# Supplementary material for: De Novo Transcriptional Analysis of Alfalfa in Response to Saline-Alkaline Stress
Source: Front Plant Sci. 2016 Jul 4;7:931. doi: 10.3389/fpls.2016.00931 (PMC4931813; doi:10.3389/fpls.2016.00931)
Supplement: Supplementary file 1 [file Data_Sheet_1.XLS]

## Sheet: DEGs in 1day
DEGs in 1 day treatment
Gene ID	log2 fold change(1day)	Gene definition
c39531_g1_i1	9.28205	Medtr5g026590.1
c60384_g1_i2	9.05295	Medtr4g112440.1
c70043_g1_i2	9.04005	Medtr2g035130.1
c61440_g1_i1	8.87181	Medtr4g102460.1
c51524_g1_i2	8.69387	Medtr2g075570.1
c81528_g2_i1	8.26456	Medtr3g467360.1
c56726_g1_i1	8.26336	Medtr7g065600.1
c66854_g2_i1	8.18626	Medtr5g031300.1
c60125_g1_i1	8.07202	Medtr5g062320.1
c53992_g2_i1	8.01772	Medtr0428s0030.1
c6673_g1_i1	7.98125	Medtr8g022770.2
c61857_g3_i1	7.88866	Medtr6g013990.1
c48223_g1_i1	7.86126	Medtr2g035210.1
c63117_g1_i1	7.84001	Medtr1g040735.1
c74982_g1_i2	7.79483	Medtr6g033535.1
c79379_g4_i1	7.77594	Medtr2g079990.2
c73925_g1_i1	7.75693	Medtr4g069520.1
c73864_g1_i2	7.74347	AT1G26970.1
c56512_g1_i1	7.71858	Medtr1g110980.1
c74086_g1_i6	7.66708	Medtr6g084640.1
c58980_g1_i1	7.63218	Medtr2g031630.1
c71058_g2_i1	7.62617	Medtr8g083290.1
c49437_g1_i1	7.61165	Medtr6g015745.1
c71194_g1_i4	7.5883	Medtr3g083130.1
c36462_g1_i1	7.57917	Medtr7g081010.1
c68976_g2_i1	7.50836	Medtr5g055690.1
c79980_g2_i1	7.43233	Medtr4g014150.1
c73977_g1_i1	7.40028	Medtr1g086530.1
c54273_g1_i1	7.39539	Medtr3g464580.3
c66140_g2_i1	7.39181	Medtr8g090095.1
c68750_g1_i2	7.37474	Medtr1g031230.1
c51294_g1_i1	7.36491	Medtr1g090867.1
c66140_g3_i1	7.35665	Medtr8g090095.1
c51658_g1_i1	7.3422	Medtr4g081390.1
c48079_g1_i1	7.32734	Medtr1g061540.1
c61576_g1_i1	7.29827	Medtr1g027960.1
c43997_g1_i2	7.29678	Medtr1g021638.1
c66086_g1_i1	7.2904	Medtr1g090150.1
c12045_g1_i1	7.27999	Medtr3g081500.1
c78682_g1_i2	7.26063	Medtr3g041720.1
c81921_g1_i1	7.20624	Medtr5g034120.1
c30741_g1_i1	7.18565	Medtr3g098310.2
c29938_g1_i1	7.17598	Medtr5g071990.1
c77236_g1_i1	7.16795	Glyma.13G270100.1.p
c38872_g1_i1	7.14561	Medtr8g046260.1
c81844_g1_i4	7.12482	Medtr2g037690.1
c80665_g3_i2	7.10016	Medtr2g037140.1
c50884_g1_i1	7.09559	Medtr5g084133.1
c76519_g2_i1	7.07945	Medtr7g065720.1
c80180_g1_i1	7.0613	Medtr7g037360.1
c67375_g1_i1	7.05665	Medtr7g096720.6
c47216_g1_i1	7.04543	Medtr3g464580.3
c59039_g1_i1	7.01232	Glyma.12G002100.1.p
c31275_g1_i1	7.01175	Glyma.18G068500.1.p
c39498_g1_i1	7.00432	Medtr4g128400.1
c79383_g1_i1	7.00033	Medtr5g061550.1
c58105_g1_i1	6.99836	Medtr2g043030.1
c80640_g2_i1	6.97394	Medtr7g090180.1
c35917_g1_i1	6.95131	Medtr3g448730.1
c77555_g1_i2	6.93298	Medtr2g098070.1
c50179_g1_i1	6.90753	Medtr7g096930.1
c56191_g1_i1	6.87873	Medtr4g088630.1
c59441_g1_i2	6.87193	Medtr5g038460.2
c52444_g1_i1	6.86246	Medtr1g017090.1
c79487_g1_i2	6.84782	Medtr1g093140.1
c46531_g1_i1	6.83861	Medtr3g026150.1
c43624_g1_i1	6.83369	Medtr1g103570.1
c80585_g1_i1	6.8311	Medtr5g062290.1
c64889_g1_i1	6.81103	Medtr1g014140.1
c77662_g1_i2	6.80151	Medtr6g090605.1
c35010_g1_i1	6.78549	Medtr3g092550.1
c44968_g1_i1	6.76559	Medtr7g090420.1
c77803_g3_i1	6.75332	Medtr4g088225.1
c78932_g2_i1	6.74522	Medtr2g079630.1
c77832_g3_i1	6.73784	Medtr7g075610.1
c49473_g1_i1	6.72555	Medtr7g021740.1
c52195_g1_i1	6.71079	Medtr2g086870.1
c71818_g1_i1	6.71079	Medtr1g078190.1
c63179_g1_i1	6.70772	Medtr4g011270.1
c65906_g1_i2	6.69726	Medtr5g063740.1
c81026_g1_i2	6.67683	Medtr4g021470.1
c57190_g2_i2	6.67669	Medtr4g094342.2
c65260_g1_i1	6.65582	Medtr8g042200.1
c59166_g1_i1	6.65528	Medtr1g057920.1
c48518_g1_i1	6.65241	Medtr4g107580.1
c70196_g1_i2	6.65072	Medtr3g040760.1
c57660_g1_i1	6.64365	Medtr8g092340.1
c78419_g1_i1	6.64023	Medtr1g075153.1
c23178_g1_i1	6.63721	Glyma.02G253200.1.p
c57062_g1_i1	6.62963	Medtr1g077470.1
c49657_g1_i1	6.62818	Medtr7g027170.1
c32509_g1_i1	6.60086	Medtr4g125930.2
c79530_g2_i1	6.59492	Medtr4g129020.1
c43681_g1_i1	6.57581	Medtr2g075405.1
c80724_g2_i2	6.56018	Medtr2g079030.1
c68965_g1_i1	6.55204	Medtr2g070860.1
c51107_g1_i1	6.54621	Medtr3g051060.1
c72059_g1_i1	6.53751	Medtr8g104380.1
c70111_g1_i1	6.51307	Glyma.13G219100.1.p
c53353_g2_i1	6.50504	Glyma.12G040700.1.p
c69991_g1_i1	6.49102	Medtr6g017235.1
c71631_g1_i3	6.49062	Medtr8g447020.1
c52303_g1_i1	6.48877	Medtr8g032000.1
c77019_g1_i1	6.47975	Medtr7g075890.1
c75728_g1_i1	6.47362	Glyma.13G070200.5.p
c32579_g1_i1	6.46983	Glyma.01G112200.3.p
c50046_g1_i1	6.4654	Medtr1g062090.1
c35719_g1_i1	6.45374	Glyma.18G158100.2.p
c22735_g1_i1	6.43539	Medtr7g116620.1
c38569_g1_i1	6.43259	Medtr8g096910.1
c75316_g2_i1	6.43208	Medtr3g100320.1
c44688_g1_i1	6.42326	Medtr2g075940.1
c82578_g1_i1	6.39891	Medtr4g087850.1
c2967_g1_i1	6.38707	Medtr5g022380.2
c71438_g2_i4	6.38239	Medtr3g435210.1
c32877_g1_i1	6.37188	Medtr5g086540.1
c53013_g1_i1	6.33632	Medtr2g103490.1
c63911_g1_i2	6.3363	Medtr5g095740.1
c69446_g1_i1	6.32838	Medtr5g057715.1
c62008_g1_i1	6.32547	Medtr2g012380.2
c49264_g1_i1	6.3198	Medtr3g088705.1
c22378_g1_i1	6.30419	Medtr7g077160.1
c70144_g1_i1	6.29811	Medtr6g011310.2
c67017_g1_i1	6.27618	Medtr1g042670.1
c66737_g2_i1	6.27397	AT1G63680.1
c58877_g1_i1	6.26752	Medtr5g018060.1
c74984_g1_i1	6.26682	Medtr5g032060.1
c74694_g1_i3	6.2651	Medtr1g014180.1
c57395_g1_i1	6.26467	Medtr3g087280.1
c58486_g1_i1	6.25226	Medtr5g046030.1
c58695_g1_i1	6.24816	Medtr3g116240.1
c47559_g2_i1	6.24718	Medtr7g116960.1
c58797_g1_i1	6.24707	Medtr7g082740.1
c64099_g1_i1	6.24671	Medtr5g035070.1
c80962_g1_i1	6.24161	Medtr6g016260.1
c37667_g1_i1	6.24096	Medtr8g028600.1
c75864_g1_i2	6.23949	Medtr3g008010.1
c56930_g1_i1	6.23269	Medtr4g094562.2
c54686_g1_i1	6.23151	Medtr3g062640.1
c76645_g2_i1	6.22303	Glyma.14G188500.1.p
c61350_g1_i2	6.22007	Medtr6g084360.1
c59644_g1_i1	6.21653	Medtr1g052110.1
c80724_g3_i1	6.21062	Medtr2g078960.1
c75971_g2_i4	6.20875	Medtr7g066260.1
c24919_g1_i1	6.20557	Medtr4g128410.1
c43334_g1_i1	6.1981	Medtr3g034640.1
c60750_g2_i1	6.19176	Medtr5g096850.1
c13346_g1_i1	6.1887	Medtr4g051380.1
c37674_g1_i1	6.1856	Medtr2g078780.1
c39020_g1_i1	6.17995	Medtr2g103490.1
c81680_g1_i2	6.169	Medtr4g127560.1
c74028_g1_i4	6.16892	Medtr7g069980.1
c42988_g1_i1	6.1622	Medtr5g064080.2
c84851_g1_i1	6.16149	Medtr7g104300.1
c87892_g1_i1	6.15486	Medtr0212s0040.1
c57868_g1_i1	6.1426	Medtr5g039730.1
c72165_g1_i2	6.14046	Medtr8g070040.1
c53583_g1_i1	6.13431	Medtr3g092500.1
c49983_g1_i1	6.12442	Medtr2g067420.1
c62471_g1_i1	6.11993	Medtr3g078633.1
c68017_g1_i1	6.1191	Medtr4g064887.1
c68924_g1_i1	6.11107	Medtr2g034370.1
c29038_g1_i1	6.11065	Medtr2g436780.1
c66203_g1_i1	6.10193	Medtr2g045280.1
c77526_g3_i1	6.09906	Medtr5g020990.1
c15766_g1_i1	6.09721	Medtr8g094810.1
c75496_g1_i7	6.09676	Medtr3g067995.1
c78628_g2_i3	6.09588	Medtr3g012080.1
c55443_g1_i2	6.07908	Medtr5g019650.1
c47625_g1_i1	6.06929	Medtr4g109980.1
c8098_g1_i1	6.06845	Medtr5g012590.1
c52524_g1_i1	6.06566	Medtr6g004430.1
c48503_g1_i1	6.06192	Medtr5g019680.1
c74086_g1_i1	6.05749	Medtr6g084640.1
c44642_g1_i1	6.03459	Medtr2g070130.1
c45622_g1_i1	6.02157	Medtr2g101090.1
c74359_g1_i6	6.00754	Medtr3g028490.1
c37194_g1_i1	6.00629	Medtr7g099280.6
c54838_g2_i1	6.00164	Medtr3g105595.1
c73902_g1_i3	5.98235	Medtr4g119840.1
c58444_g2_i1	5.97208	Medtr5g025610.3
c62794_g1_i1	5.96939	Medtr3g069290.1
c71966_g1_i1	5.96412	Medtr4g064180.2
c55145_g1_i1	5.96352	Medtr4g117330.1
c80818_g1_i6	5.95788	Medtr2g037690.1
c23246_g1_i1	5.95474	Medtr5g045190.1
c80610_g1_i3	5.95367	Medtr3g467420.1
c77616_g1_i1	5.95266	Medtr7g079080.1
c63778_g1_i1	5.94917	Medtr0475s0040.1
c40878_g1_i1	5.94859	Medtr5g046670.1
c61196_g1_i1	5.9459	Medtr4g094555.1
c57170_g1_i1	5.94437	Medtr2g089080.1
c64234_g1_i1	5.93938	Medtr1g110180.1
c72032_g2_i1	5.93868	Medtr1g090060.1
c64297_g1_i1	5.92283	Medtr6g007807.1
c56037_g1_i1	5.90432	Medtr1g074090.1
c67521_g1_i1	5.90009	Glyma.14G163200.1.p
c80459_g1_i2	5.89839	Medtr8g040170.2
c51137_g1_i1	5.89367	Medtr7g086210.1
c71272_g1_i1	5.88513	Medtr4g057765.1
c66421_g2_i1	5.87978	Medtr3g098320.1
c63881_g1_i1	5.87866	Medtr1g088920.1
c68338_g1_i1	5.86505	Medtr2g096540.1
c34779_g1_i1	5.86146	Medtr7g406860.2
c68732_g1_i1	5.86028	Medtr0927s0010.1
c64152_g1_i1	5.85605	Medtr8g075510.1
c29200_g1_i1	5.85467	Medtr2g013640.1
c64653_g1_i1	5.84613	Medtr4g017310.1
c63193_g1_i1	5.84257	Medtr7g087040.1
c70727_g2_i1	5.84222	Medtr6g088245.1
c61141_g1_i1	5.83863	Medtr7g081750.1
c23392_g1_i1	5.83497	Glyma.13G139400.1.p
c72842_g3_i3	5.83488	Medtr2g039770.1
c77177_g1_i1	5.82438	Medtr6g028100.2
c22335_g1_i1	5.82197	Medtr6g069460.1
c60529_g1_i2	5.81989	Medtr5g004990.1
c49319_g1_i1	5.81877	Medtr4g022610.1
c80860_g2_i1	5.81122	Glyma.18G266000.1.p
c40102_g1_i1	5.80633	Medtr1g110190.1
c25113_g1_i1	5.79703	Medtr3g116480.1
c81468_g1_i2	5.78733	Medtr8g069505.1
c65393_g1_i3	5.7873	Medtr1g105820.1
c50453_g1_i1	5.78234	Medtr8g028225.1
c47920_g1_i1	5.78204	Medtr4g127120.1
c72214_g1_i1	5.78137	Glyma.13G316300.1.p
c47839_g1_i1	5.77621	Medtr3g117850.2
c54157_g1_i1	5.74826	Medtr3g007240.1
c37141_g1_i1	5.73861	Medtr2g009070.1
c61436_g2_i1	5.73407	Medtr7g104870.1
c83505_g1_i1	5.69285	Medtr8g092100.1
c75381_g1_i3	5.69196	Medtr8g005560.1
c53711_g1_i1	5.68047	Medtr3g436860.2
c63235_g1_i1	5.67905	Medtr3g452730.1
c40036_g1_i1	5.67087	Medtr5g088770.1
c78522_g1_i2	5.66807	Medtr8g432490.1
c47408_g1_i1	5.66383	Medtr8g098615.1
c47322_g1_i1	5.6614	Medtr3g088440.1
c79746_g1_i1	5.65817	Medtr4g020110.1
c56252_g1_i1	5.65612	Medtr7g115550.2
c53943_g1_i1	5.65181	Medtr7g093530.1
c37454_g1_i1	5.65155	Medtr5g004720.1
c46860_g1_i2	5.64668	Medtr2g089160.1
c22088_g1_i1	5.64668	Medtr3g467420.1
c78027_g1_i1	5.64321	Medtr1g093100.1
c49828_g1_i1	5.64063	Medtr7g079320.1
c77019_g1_i2	5.63967	Medtr5g063210.1
c49851_g1_i1	5.63638	Medtr4g051515.1
c41115_g1_i1	5.63373	Medtr5g056220.1
c55083_g1_i2	5.63034	Medtr1g112270.2
c55360_g2_i2	5.62394	Medtr7g015340.1
c73939_g2_i1	5.61241	Medtr3g117530.3
c61307_g1_i1	5.60909	Medtr2g089440.2
c79995_g1_i1	5.60869	Medtr5g459450.1
c55375_g1_i1	5.59486	Medtr1g022495.1
c49529_g1_i1	5.59217	Medtr7g101385.1
c75900_g3_i4	5.58343	Medtr1g062200.2
c46845_g1_i1	5.58162	AT2G35340.1
c51328_g1_i1	5.5736	Medtr8g075380.1
c78946_g4_i2	5.5729	Medtr5g086030.1
c53330_g1_i1	5.56892	Glyma.10G261300.3.p
c58900_g1_i1	5.56356	Glyma.20G174400.1.p
c35110_g1_i1	5.56089	Medtr8g107440.1
c26922_g1_i1	5.56074	Medtr2g015850.1
c65069_g1_i1	5.55945	Medtr2g022540.1
c41400_g1_i1	5.54969	Medtr4g106800.1
c56152_g1_i2	5.54447	Medtr2g094130.2
c71880_g1_i3	5.53727	Medtr4g014300.1
c67893_g1_i1	5.53625	Medtr5g061610.1
c75880_g2_i1	5.52425	Medtr4g134760.1
c74753_g1_i1	5.51549	Medtr2g084215.1
c35899_g1_i1	5.51378	Medtr4g036880.1
c70690_g2_i1	5.51255	Medtr8g062700.1
c64700_g1_i2	5.5093	Medtr5g021000.1
c33303_g1_i1	5.50646	Medtr2g030570.1
c57447_g1_i1	5.4994	Medtr7g112970.1
c68750_g1_i1	5.49836	Medtr1g031230.1
c56289_g1_i1	5.47991	Medtr1g088680.1
c61209_g1_i1	5.47607	Medtr1g058350.1
c81669_g3_i1	5.47596	Medtr3g463760.1
c74086_g1_i5	5.47225	Medtr6g084640.1
c54497_g1_i1	5.47006	Medtr1g023340.2
c41065_g1_i1	5.46262	Medtr2g049630.1
c48497_g1_i2	5.45438	Medtr1g084660.2
c53848_g1_i1	5.45049	Medtr4g111985.3
c63159_g1_i1	5.44364	Medtr7g079350.1
c52692_g1_i1	5.44097	Medtr3g096330.1
c44516_g1_i1	5.42656	Medtr4g062510.1
c75225_g1_i2	5.4111	Medtr2g008030.1
c54540_g1_i1	5.41041	Medtr8g070950.1
c61188_g1_i1	5.41006	Medtr2g072160.1
c64336_g1_i1	5.4055	Medtr4g006080.1
c23842_g1_i1	5.40492	Medtr3g087390.1
c67714_g1_i1	5.40299	Medtr6g016260.1
c66401_g1_i2	5.40263	Medtr4g014280.1
c70153_g1_i2	5.40016	Medtr1g066710.1
c61364_g1_i1	5.39951	Medtr2g089210.1
c61786_g1_i1	5.39771	Medtr8g077580.1
c75084_g3_i1	5.39755	Medtr4g014570.1
c68002_g1_i1	5.39365	Medtr2g009750.2
c61303_g1_i1	5.39191	Medtr4g064200.1
c62520_g1_i1	5.36886	Medtr4g066210.1
c75350_g3_i1	5.36866	Medtr3g028630.1
c47643_g1_i1	5.35669	Medtr5g096680.1
c80383_g1_i1	5.34318	Medtr7g062540.1
c58582_g1_i1	5.33679	Medtr1g014140.1
c47529_g1_i1	5.33034	Medtr1g019750.1
c73915_g2_i1	5.32747	Medtr4g026030.1
c66046_g1_i1	5.32093	Medtr4g066590.1
c72713_g1_i1	5.31369	Medtr5g056500.1
c62943_g1_i1	5.31219	Medtr4g127780.1
c49791_g1_i1	5.30589	Medtr1g084170.1
c40561_g1_i1	5.30159	Medtr2g083810.1
c49121_g1_i1	5.30121	Medtr3g113170.2
c59132_g1_i1	5.28019	Medtr3g034640.1
c70588_g2_i1	5.27525	Medtr8g080770.2
c79747_g1_i1	5.26757	Medtr7g080900.1
c53886_g1_i1	5.2598	Medtr5g015830.1
c54581_g1_i1	5.25807	Glyma.09G118500.1.p
c48399_g1_i1	5.25758	Medtr5g016320.1
c64836_g1_i1	5.25546	Medtr7g052020.1
c68330_g1_i2	5.24157	Glyma.07G220000.1.p
c73977_g2_i1	5.23773	Medtr1g086530.1
c55652_g1_i1	5.23515	Medtr1g029540.1
c65209_g1_i1	5.22976	Medtr8g013780.1
c65419_g2_i1	5.22759	Medtr4g094705.1
c58375_g1_i1	5.21807	Medtr8g012725.1
c44335_g1_i1	5.20472	Medtr1g090070.1
c65940_g1_i1	5.20137	Medtr7g080490.1
c68991_g1_i1	5.20074	Medtr3g111800.2
c60750_g1_i1	5.19977	Medtr3g461480.1
c56184_g1_i1	5.19909	Medtr2g013370.1
c65861_g1_i2	5.19827	Medtr3g466420.1
c51193_g1_i1	5.19159	Medtr5g004690.1
c59388_g1_i2	5.19115	Medtr5g035740.1
c74470_g1_i2	5.19115	Medtr5g029900.1
c70438_g1_i1	5.19041	Medtr4g026030.1
c74906_g1_i2	5.18164	Medtr1g043080.1
c72545_g1_i1	5.18142	Medtr1g110550.1
c74407_g1_i1	5.17962	Medtr1g025490.1
c22321_g1_i1	5.16549	Medtr7g114630.1
c45353_g1_i1	5.16479	Medtr6g083730.1
c57446_g1_i1	5.16083	Medtr6g068970.1
c80415_g2_i1	5.15502	Medtr3g099700.1
c68244_g1_i1	5.15499	Medtr2g096030.1
c59542_g1_i1	5.15483	Medtr1g021590.1
c67453_g1_i1	5.15147	Medtr6g092940.1
c64915_g1_i1	5.14999	Glyma.08G289100.2.p
c78592_g3_i1	5.14611	Medtr6g039440.1
c66698_g1_i2	5.14469	Medtr8g079360.1
c51785_g1_i3	5.14025	Medtr0116s0010.1
c69541_g1_i1	5.13956	Glyma.05G137500.1.p
c81111_g2_i1	5.13838	Medtr1g019760.2
c51781_g1_i1	5.13717	Medtr6g043640.1
c60168_g1_i1	5.13439	Medtr2g104050.1
c57754_g1_i1	5.12849	Medtr7g063650.1
c72897_g1_i1	5.12706	Medtr2g072980.1
c77509_g1_i1	5.12555	Medtr4g048000.1
c77845_g3_i1	5.1244	Medtr2g031590.1
c18624_g1_i1	5.12353	Medtr5g093980.1
c64303_g1_i1	5.12352	Medtr5g073610.1
c77558_g2_i1	5.12187	Medtr8g040910.1
c38181_g1_i1	5.11071	Medtr0139s0020.1
c75971_g2_i2	5.11042	Medtr7g066290.1
c43150_g1_i1	5.10773	Glyma.11G099400.2.p
c69161_g1_i1	5.10299	Medtr4g114080.1
c80610_g1_i1	5.09884	Medtr3g467430.1
c61436_g1_i1	5.09859	Medtr7g104870.1
c65494_g2_i1	5.08925	Medtr1g108840.1
c68160_g1_i1	5.08751	Medtr8g096020.1
c70197_g2_i1	5.08707	Medtr1g099010.1
c63160_g1_i1	5.0709	Medtr0009s0370.1
c59965_g1_i1	5.06794	Medtr2g011180.1
c61146_g1_i1	5.0679	Medtr3g056675.1
c72022_g1_i3	5.06373	Medtr2g036490.1
c75350_g2_i5	5.05393	Medtr1g027840.1
c78573_g1_i1	5.04486	Medtr4g090525.1
c80713_g1_i2	5.04007	Medtr7g077740.1
c68432_g1_i2	5.03757	Medtr6g036500.1
c66030_g1_i2	5.03279	Medtr7g117200.1
c62728_g1_i1	5.02138	Medtr7g067530.1
c77561_g1_i2	5.01373	Medtr4g020460.1
c74553_g2_i1	5.01029	Medtr8g461330.1
c63853_g1_i1	5.01005	Medtr3g094170.2
c76323_g1_i1	5.00764	Medtr6g089960.1
c67727_g1_i1	5.00354	Medtr2g087950.1
c20439_g1_i1	5.00034	Medtr3g076540.1
c49724_g1_i1	4.99811	Medtr2g035430.1
c35317_g1_i1	4.99741	Medtr6g087920.1
c35929_g1_i1	4.99379	AT4G23160.1
c74290_g1_i1	4.99161	Medtr3g088845.1
c79154_g1_i1	4.99145	Medtr1g492690.1
c35669_g1_i1	4.98942	Medtr2g100450.2
c53719_g1_i1	4.98883	Medtr7g069120.1
c1116_g1_i1	4.97241	Medtr1g083250.4
c79577_g2_i1	4.97079	Medtr1g100623.2
c71937_g1_i1	4.97058	Medtr5g091680.2
c63722_g2_i1	4.96392	Medtr2g101610.1
c79370_g2_i1	4.96139	Medtr1g090877.1
c57741_g1_i1	4.95922	Medtr0009s0100.1
c63987_g1_i1	4.95781	Medtr3g058540.1
c75184_g2_i1	4.95767	Medtr2g102267.1
c45125_g1_i1	4.95732	Medtr5g010300.4
c69112_g2_i1	4.95599	Medtr3g012240.2
c81086_g1_i2	4.95444	Medtr1g060030.1
c31972_g1_i1	4.95282	Medtr8g088460.1
c80508_g1_i1	4.94772	Medtr1g073180.1
c59098_g1_i1	4.94617	Glyma.04G013400.1.p
c78607_g3_i1	4.94498	Medtr3g091290.1
c58709_g1_i1	4.94332	Medtr1478s0010.1
c54464_g1_i1	4.94181	Medtr4g092780.1
c71642_g1_i1	4.93607	Medtr6g016015.1
c57490_g1_i1	4.9357	Medtr3g110022.2
c77480_g2_i3	4.9324	Medtr7g066590.1
c48173_g1_i1	4.92237	Medtr4g062510.1
c65246_g1_i1	4.91535	Medtr8g063700.1
c78267_g3_i1	4.91504	Medtr4g066660.1
c76519_g1_i3	4.91279	Medtr7g065290.1
c56502_g1_i1	4.91122	Medtr3g028630.1
c73215_g1_i1	4.90978	Medtr7g082730.1
c75241_g1_i1	4.9097	Medtr4g095050.1
c69339_g1_i1	4.90079	Medtr4g088225.1
c55602_g1_i1	4.90034	Medtr3g058320.1
c65206_g1_i1	4.89963	Medtr7g010950.1
c63332_g1_i1	4.89767	Medtr7g028855.1
c66184_g1_i1	4.897	Medtr2g086040.1
c72368_g2_i1	4.89382	Medtr2g086040.1
c48946_g1_i1	4.89375	Medtr8g023990.1
c72842_g1_i1	4.8845	Medtr6g088250.1
c44972_g1_i1	4.88324	Medtr6g033000.1
c61770_g1_i1	4.88214	Medtr4g007540.2
c77749_g2_i1	4.87519	Medtr7g066210.1
c69872_g1_i2	4.86709	Medtr7g108680.1
c69184_g2_i1	4.86365	Medtr7g088825.1
c78414_g1_i1	4.8596	Medtr4g083660.1
c21148_g1_i1	4.85625	Medtr5g012590.1
c80820_g2_i1	4.8484	Medtr6g083940.1
c58491_g1_i1	4.84715	Medtr4g016590.1
c61089_g1_i1	4.84702	Medtr8g093620.1
c59342_g1_i1	4.84522	Medtr4g078535.1
c64169_g1_i1	4.83291	Medtr3g436860.1
c44510_g1_i1	4.83124	Medtr2g083920.2
c69511_g1_i1	4.82866	Medtr5g025310.1
c26597_g1_i1	4.82232	Medtr2g436020.1
c81157_g2_i1	4.82135	Medtr1g013640.1
c79980_g1_i1	4.81836	Medtr1g114550.1
c70098_g1_i2	4.81372	Medtr8g039140.2
c64756_g1_i1	4.80327	Medtr8g089810.2
c73848_g1_i4	4.80024	Medtr4g127510.1
c64141_g1_i1	4.79792	Medtr3g109040.2
c67695_g1_i1	4.7922	Medtr1g027060.1
c66210_g1_i1	4.79104	Medtr1g017770.1
c79675_g1_i1	4.79074	Medtr8g090165.1
c56054_g1_i1	4.78852	Medtr4g094268.1
c66880_g1_i3	4.78607	Medtr7g100880.1
c56000_g1_i1	4.78518	Medtr3g103050.1
c51283_g1_i1	4.77507	Medtr7g105630.1
c79441_g1_i2	4.77291	Medtr6g068930.1
c48392_g1_i2	4.76913	Medtr2g078930.1
c81086_g1_i4	4.76717	Medtr2g041070.2
c67928_g1_i1	4.76688	Medtr2g008730.1
c62274_g1_i1	4.76451	Medtr5g005330.1
c57032_g1_i1	4.76305	Medtr1g073840.1
c79441_g1_i1	4.75184	Medtr6g068930.1
c32514_g1_i1	4.74954	Medtr4g078110.1
c53374_g1_i1	4.74701	Medtr7g046515.1
c61679_g2_i1	4.74329	Medtr1g007990.1
c70739_g2_i1	4.7363	Medtr4g061833.1
c71138_g1_i1	4.73501	Medtr3g450310.1
c55349_g1_i1	4.73294	Medtr8g087730.1
c74502_g1_i1	4.73154	Medtr6g016640.1
c78113_g2_i1	4.72524	Medtr5g029580.1
c61105_g1_i1	4.72215	Medtr8g086520.3
c46517_g1_i1	4.72093	Medtr6g079470.1
c54131_g1_i1	4.71993	Medtr3g100710.1
c62806_g1_i2	4.71892	Medtr7g068710.1
c64019_g1_i1	4.717	Medtr8g465990.1
c67504_g1_i1	4.71643	Medtr3g114010.1
c66380_g1_i1	4.71071	Medtr2g097900.3
c58597_g1_i1	4.70986	Medtr4g013260.1
c60419_g1_i1	4.70883	Medtr7g021510.1
c74702_g1_i1	4.70422	Medtr1g032140.1
c68952_g2_i1	4.70268	Medtr4g011230.1
c58754_g1_i1	4.69993	Medtr1g041475.1
c75084_g3_i2	4.69266	Medtr6g015435.1
c63084_g1_i1	4.69224	Medtr3g092550.1
c68118_g1_i1	4.69148	Medtr3g436860.1
c51864_g1_i1	4.68978	Medtr2g007250.1
c59055_g1_i1	4.68951	Medtr0113s0040.1
c62906_g1_i1	4.68026	Medtr1g045560.1
c64134_g1_i1	4.67663	Medtr2g011690.1
c65888_g1_i1	4.67456	Medtr8g028600.1
c43233_g1_i1	4.67172	Medtr4g106800.1
c60442_g1_i1	4.66856	Medtr2g436510.1
c55239_g1_i1	4.66763	Medtr4g093830.1
c63008_g1_i1	4.6673	Medtr1g029130.1
c58996_g1_i1	4.66531	Medtr8g075510.1
c72027_g1_i3	4.65947	Medtr2g068850.1
c72678_g2_i1	4.65717	Medtr2g090165.1
c69400_g1_i1	4.65461	Medtr6g071340.1
c57366_g1_i1	4.64623	Medtr5g011180.1
c76948_g2_i1	4.64328	Medtr2g033170.1
c23796_g1_i1	4.6422	Medtr3g071990.2
c65597_g1_i1	4.63672	Medtr6g034515.1
c68954_g1_i1	4.63631	Medtr5g019650.1
c72529_g1_i1	4.63147	Medtr4g081880.1
c79960_g2_i1	4.62883	Medtr8g104110.1
c56216_g1_i1	4.62554	Medtr7g405790.1
c53662_g1_i1	4.62445	Medtr2g094620.3
c63080_g1_i2	4.61802	Medtr2g008710.1
c59793_g1_i1	4.61045	Medtr3g007240.1
c68485_g3_i1	4.60808	Medtr4g067260.2
c85285_g1_i1	4.60242	Medtr3g009400.1
c60099_g1_i1	4.60091	Medtr6g086805.1
c59640_g1_i1	4.60035	Medtr4g101380.1
c73059_g1_i2	4.60029	Medtr3g089090.1
c67722_g1_i1	4.59942	Medtr3g437630.1
c76400_g1_i1	4.5971	Medtr0186s0090.1
c75282_g1_i1	4.59048	Medtr3g072320.1
c64197_g1_i1	4.58881	Medtr4g051575.1
c56347_g1_i2	4.58598	Medtr7g029400.1
c64621_g4_i1	4.58564	Medtr4g080320.2
c77573_g1_i2	4.58488	Medtr3g073070.1
c79577_g3_i1	4.58402	Medtr1g100627.1
c79997_g1_i1	4.57584	Medtr3g462390.1
c78833_g1_i1	4.57501	Medtr4g124470.1
c46545_g1_i1	4.57396	Medtr1g012550.1
c76480_g1_i1	4.56922	Medtr8g015510.2
c71332_g1_i3	4.55846	Medtr5g043280.1
c58622_g1_i2	4.55054	Medtr1g073360.3
c72625_g1_i1	4.54913	Glyma.08G077300.1.p
c73061_g1_i1	4.54521	Medtr2g046450.1
c63640_g1_i2	4.53869	Medtr2g005840.3
c36978_g1_i1	4.53735	Medtr8g471180.1
c62565_g1_i1	4.53692	Medtr7g096870.1
c70778_g1_i1	4.53232	Medtr5g055680.1
c78714_g1_i2	4.53171	Medtr2g038040.1
c61685_g1_i1	4.52905	Medtr5g029070.2
c69233_g3_i1	4.51284	Medtr7g026095.1
c74521_g1_i1	4.5083	Medtr1g089130.1
c68334_g1_i1	4.5079	Medtr5g025010.2
c51655_g1_i1	4.50509	Medtr0126s0010.1
c59703_g1_i1	4.50498	Medtr3g072000.1
c65945_g1_i2	4.50473	Medtr5g014640.1
c70594_g1_i1	4.4892	Medtr4g120220.1
c72376_g1_i1	4.47951	Medtr7g082570.1
c66820_g1_i1	4.47891	Glyma.02G288600.2.p
c78414_g1_i2	4.47682	Medtr4g083660.1
c50819_g1_i1	4.47329	Medtr4g088955.1
c54914_g1_i1	4.46961	Medtr4g077763.1
c69198_g1_i1	4.46671	Medtr5g038380.1
c76488_g2_i2	4.46526	Medtr4g051698.1
c61792_g1_i1	4.45922	Medtr4g088055.1
c75344_g1_i1	4.45838	Medtr7g047270.1
c51685_g1_i1	4.44924	Medtr3g449470.1
c66860_g1_i1	4.4432	Medtr4g127630.1
c67832_g1_i3	4.44311	Medtr5g068680.1
c57081_g1_i1	4.44056	Medtr8g096730.1
c72914_g2_i2	4.43906	Medtr5g053590.1
c51935_g1_i1	4.43523	Medtr0137s0080.1
c54776_g2_i1	4.43418	Medtr3g111830.1
c77822_g2_i3	4.43178	Medtr5g019350.1
c49239_g1_i1	4.42574	Medtr5g061690.2
c60476_g1_i1	4.42291	Medtr1g031650.1
c74120_g1_i1	4.41529	Medtr5g048160.1
c65539_g1_i1	4.41397	Medtr3g460790.1
c71210_g2_i1	4.41385	Medtr2g055400.1
c64471_g1_i1	4.41355	Medtr3g008160.1
c58733_g1_i1	4.40862	Medtr6g034915.1
c80068_g1_i2	4.40727	Medtr5g068440.1
c50793_g1_i1	4.40713	Medtr1g024820.1
c64602_g1_i1	4.40587	Glyma.06G003300.1.p
c39884_g1_i1	4.40445	Medtr4g119830.1
c66706_g1_i1	4.4038	Medtr8g087740.1
c14195_g1_i1	4.40219	Medtr3g116640.2
c45130_g1_i1	4.39333	Glyma.13G368400.1.p
c79563_g1_i1	4.39299	Medtr2g022490.1
c73653_g1_i1	4.39134	Medtr4g117330.1
c63732_g1_i1	4.3868	Medtr4g090580.1
c79483_g1_i1	4.38679	Medtr1g061130.1
c51408_g1_i2	4.38605	Medtr2g084875.1
c55532_g1_i1	4.38099	Medtr4g019710.1
c69929_g2_i1	4.37938	Medtr4g014490.1
c71137_g1_i1	4.37587	Medtr3g107090.1
c78180_g1_i1	4.37488	Medtr8g061360.1
c62077_g1_i1	4.36989	Medtr5g077170.1
c67235_g1_i1	4.36453	Medtr5g038700.1
c67877_g1_i1	4.36013	Medtr8g092010.1
c45099_g1_i1	4.35994	Medtr1g027010.1
c67620_g1_i1	4.35873	Medtr5g066330.3
c65210_g1_i1	4.35374	Medtr1g110180.1
c42980_g1_i1	4.34903	Medtr1g028370.1
c43774_g1_i1	4.34735	Medtr1g074040.1
c81639_g1_i1	4.34556	Medtr3g101960.1
c81638_g1_i2	4.3435	Medtr8g028895.1
c22736_g1_i1	4.3399	Medtr2g062660.1
c80426_g1_i1	4.3399	Medtr2g461180.1
c5296_g1_i1	4.33843	Medtr3g116840.1
c63843_g1_i1	4.32618	Medtr7g110980.1
c73026_g1_i6	4.32614	Medtr0286s0040.1
c61431_g1_i1	4.32518	Medtr2g096160.1
c74362_g1_i1	4.32335	Medtr1g110220.1
c16083_g1_i1	4.32135	Medtr4g094302.1
c79577_g1_i1	4.31761	Medtr1g100627.1
c77596_g1_i3	4.31503	Medtr6g028100.2
c68072_g1_i1	4.31095	Medtr3g467100.1
c72567_g1_i1	4.31091	Medtr4g088225.2
c67889_g1_i2	4.3107	Medtr1g037460.1
c57194_g1_i1	4.30928	Medtr3g098380.1
c65985_g1_i1	4.3089	Medtr7g110780.1
c38007_g1_i1	4.30726	Medtr2g036980.1
c56327_g1_i2	4.30669	Medtr0003s0580.1
c59394_g1_i2	4.30599	Medtr6g092940.1
c69875_g1_i3	4.3055	Medtr3g048970.1
c61076_g1_i1	4.30328	Medtr1g100060.1
c63333_g1_i1	4.30249	Medtr5g053590.1
c74662_g1_i1	4.30143	Medtr8g079450.1
c67803_g2_i2	4.30113	Medtr2g019000.1
c68445_g2_i1	4.29185	Medtr8g041910.1
c60622_g2_i1	4.2899	Medtr1g061600.1
c80783_g1_i4	4.28652	Medtr3g107930.2
c75803_g1_i3	4.28408	Medtr5g048160.1
c63883_g1_i1	4.27467	Medtr4g006650.1
c66107_g1_i1	4.27394	Medtr1g029550.1
c63563_g1_i1	4.27252	Medtr2g080220.1
c72322_g2_i1	4.27034	Medtr4g031235.1
c49775_g1_i1	4.27019	Glyma.15G144500.1.p
c77940_g2_i1	4.26444	Medtr1g032220.1
c71552_g1_i1	4.26301	Medtr3g063050.1
c70934_g1_i1	4.25988	Medtr3g063180.1
c46366_g1_i1	4.25914	Glyma.03G047400.1.p
c70153_g1_i3	4.25251	Medtr1g066380.1
c63951_g1_i1	4.25095	Medtr1g078370.1
c79379_g1_i2	4.25024	Medtr8g059170.1
c69529_g1_i1	4.24847	Glyma.17G077500.1.p
c48321_g1_i1	4.24378	Medtr1g090520.1
c64254_g1_i1	4.24056	Medtr4g129670.1
c77835_g1_i2	4.24047	Medtr4g032670.1
c74897_g1_i2	4.23891	Medtr2g100100.1
c44801_g1_i1	4.23626	Medtr8g093560.1
c76809_g3_i1	4.23602	Medtr6g471210.1
c55368_g1_i1	4.23528	AT3G12110.1
c59154_g1_i1	4.23473	Medtr4g099380.1
c74040_g1_i1	4.2331	Medtr5g025690.1
c80741_g1_i2	4.23252	Medtr4g079100.1
c65777_g1_i1	4.23117	Medtr2g061690.1
c67128_g1_i2	4.22783	Medtr6g088690.1
c44140_g1_i1	4.22314	Medtr1g059660.1
c73358_g2_i1	4.22163	Medtr8g066210.1
c78133_g1_i5	4.22042	Medtr4g094550.1
c75350_g2_i1	4.216	Medtr1g028100.1
c57500_g1_i1	4.2136	Medtr7g103490.2
c72836_g1_i2	4.20799	Medtr2g068840.1
c66854_g1_i1	4.20607	Medtr5g031250.1
c62200_g1_i1	4.2048	Medtr3g037330.2
c68218_g1_i1	4.20263	Medtr6g038730.1
c58639_g1_i1	4.19999	Medtr4g109110.2
c73377_g1_i2	4.19864	Medtr3g048603.1
c60193_g1_i1	4.19651	Medtr2g019370.1
c33210_g1_i1	4.19614	Medtr3g095680.2
c81408_g2_i1	4.19602	Medtr3g078633.2
c65469_g2_i1	4.19278	Medtr4g016910.1
c45383_g1_i1	4.19135	Medtr3g007240.1
c67034_g1_i2	4.1784	Medtr4g028360.1
c53254_g1_i1	4.1758	Medtr0542s0020.1
c44842_g1_i1	4.17125	Glyma.12G125500.1.p
c73977_g1_i2	4.17107	Medtr1g086530.1
c73144_g1_i1	4.16698	Medtr7g407010.1
c62007_g1_i1	4.16643	Medtr3g111870.1
c77370_g1_i2	4.16639	Medtr2g078740.4
c36358_g1_i1	4.16314	Medtr3g068000.1
c81655_g1_i3	4.15671	Medtr6g018315.1
c22170_g1_i1	4.15599	Glyma.18G097500.1.p
c81154_g1_i1	4.14905	Medtr3g088790.1
c68069_g1_i1	4.14668	Medtr1g006990.1
c81012_g2_i1	4.14374	Medtr0856s0010.1
c81277_g1_i6	4.14341	Medtr8g042770.1
c65892_g1_i1	4.13907	Medtr1g027810.1
c61268_g1_i1	4.13276	Medtr4g109170.1
c47638_g1_i1	4.12991	Medtr1g094065.2
c68130_g1_i1	4.12575	Medtr5g010120.1
c45699_g1_i1	4.12525	Medtr2g075450.1
c74868_g1_i2	4.12463	Glyma.15G066500.1.p
c62273_g1_i1	4.12381	Medtr7g117505.1
c69051_g1_i1	4.12257	Medtr6g471240.1
c70691_g2_i1	4.12196	Medtr0148s0080.1
c52081_g1_i1	4.1188	Medtr1g007870.3
c71552_g2_i1	4.11809	Medtr3g063050.1
c61625_g1_i1	4.10727	Medtr5g016220.1
c52237_g1_i1	4.10693	Medtr1g109630.1
c71529_g1_i1	4.1016	Medtr8g074040.2
c49986_g1_i1	4.10137	Medtr1g014700.1
c79592_g1_i2	4.09602	Medtr1g098460.1
c66572_g3_i1	4.09596	Medtr6g037380.1
c69152_g1_i1	4.09595	AT1G71695.1
c72066_g1_i1	4.0942	Medtr6g012830.2
c65818_g2_i1	4.09242	Medtr7g015340.1
c53827_g1_i1	4.09006	Medtr2g011150.1
c66304_g1_i1	4.08833	Medtr3g098380.1
c64241_g1_i1	4.08794	Medtr8g012320.1
c81777_g3_i1	4.0798	Medtr1g058390.1
c74430_g2_i1	4.07708	Medtr6g045403.1
c79079_g1_i2	4.07453	Medtr4g115330.1
c63290_g1_i1	4.07233	Medtr2g018590.1
c72351_g1_i2	4.07099	Medtr6g027600.1
c75683_g1_i1	4.07021	Medtr2g018830.1
c77671_g2_i1	4.06988	Medtr7g098750.2
c63923_g1_i1	4.06839	Medtr3g031140.1
c75379_g1_i2	4.06741	Medtr4g083500.1
c66371_g1_i1	4.06719	Medtr3g023930.1
c78737_g1_i1	4.06661	Medtr5g034770.1
c63479_g1_i1	4.06605	Medtr3g096370.1
c71208_g1_i2	4.06519	Medtr4g072360.1
c55478_g1_i1	4.06449	Glyma.04G073100.1.p
c72744_g1_i1	4.05912	Medtr5g092085.1
c77018_g2_i1	4.05736	Medtr2g011630.3
c81466_g1_i2	4.05663	Medtr4g062330.1
c61397_g1_i1	4.04887	Medtr1g099550.1
c72022_g1_i1	4.04686	Medtr2g036490.1
c50858_g1_i1	4.04527	Medtr5g083500.1
c66806_g1_i1	4.04269	Medtr1g085390.1
c79132_g1_i1	4.04126	Medtr4g060480.1
c61491_g1_i1	4.04061	Medtr1g090280.1
c68338_g1_i2	4.03065	Medtr2g096540.1
c77622_g1_i2	4.02525	Medtr7g034355.1
c68868_g1_i1	4.01966	Medtr4g485640.1
c74990_g1_i2	4.01667	Medtr1g045370.1
c78138_g2_i1	4.00556	Medtr8g080800.1
c73633_g2_i1	4.00457	Medtr5g045370.1
c80536_g2_i1	4.00263	Medtr6g042540.1
c43930_g1_i1	3.9955	Medtr2g438510.1
c76945_g1_i1	3.99491	Medtr6g488100.1
c63704_g1_i2	3.99304	Medtr5g068060.1
c67652_g1_i1	3.9919	Medtr7g111650.5
c71456_g2_i1	3.99021	Medtr2g011180.2
c73031_g1_i2	3.98745	Medtr1g088845.1
c73542_g1_i1	3.9871	Medtr2g018670.1
c62611_g3_i1	3.98705	Medtr8g007190.1
c81806_g1_i2	3.98666	Medtr4g010130.1
c68975_g1_i1	3.98606	Medtr5g091100.1
c45620_g1_i1	3.984	Medtr4g054820.1
c24162_g1_i1	3.98162	Glyma.17G177300.1.p
c66782_g1_i3	3.9786	Medtr8g069315.1
c57011_g1_i1	3.97835	Medtr6g084660.1
c73270_g1_i1	3.9731	Medtr3g103580.1
c59992_g1_i1	3.9715	Medtr4g094588.1
c69067_g1_i2	3.97013	Medtr5g018680.1
c68735_g1_i1	3.96467	Medtr5g010640.1
c63220_g1_i2	3.96456	Medtr1g052170.2
c63645_g1_i1	3.96377	Medtr3g008160.2
c57673_g1_i1	3.96356	Medtr3g008020.1
c69248_g1_i1	3.95996	Medtr4g090580.1
c58323_g1_i1	3.95952	Medtr5g036540.1
c72565_g1_i1	3.9557	Medtr6g464510.1
c58875_g1_i1	3.95507	Medtr4g123040.1
c75802_g1_i3	3.95474	Medtr6g082950.1
c64154_g1_i1	3.95434	Medtr1g079400.2
c77273_g1_i1	3.94523	Medtr3g098310.1
c67906_g1_i1	3.94389	Medtr1g061170.2
c74335_g2_i1	3.93858	Medtr5g007460.1
c81699_g2_i1	3.93241	Medtr8g013560.1
c76011_g1_i2	3.92653	Medtr5g042520.1
c56699_g1_i1	3.91915	Medtr2g096640.1
c75803_g1_i2	3.9188	Medtr5g048160.1
c69012_g1_i1	3.91834	Medtr3g069570.1
c55040_g1_i1	3.91743	Medtr8g470880.1
c61805_g1_i1	3.91514	Medtr8g096920.1
c62924_g1_i1	3.91214	Medtr2g461920.1
c77206_g1_i2	3.91166	Medtr3g051610.1
c82116_g1_i1	3.9009	Medtr3g011820.1
c69296_g1_i1	3.90077	Medtr1g021610.1
c64808_g1_i1	3.89238	Medtr1g094185.1
c60035_g1_i1	3.89227	Medtr7g082300.1
c73381_g1_i1	3.88737	Medtr3g098580.1
c58353_g1_i1	3.88668	Medtr2g011600.2
c81768_g2_i1	3.8839	Medtr8g028140.1
c76938_g2_i1	3.88382	Medtr7g007080.1
c63154_g1_i1	3.88367	Medtr4g080320.2
c71866_g1_i1	3.88246	Medtr3g069050.1
c24157_g1_i1	3.8766	Medtr8g094880.1
c66088_g1_i1	3.87585	Medtr3g437630.1
c72175_g2_i3	3.87578	Medtr2g021190.1
c65473_g1_i2	3.87415	Medtr8g042940.1
c72657_g1_i1	3.8714	Medtr5g073620.1
c76854_g4_i1	3.86829	Medtr6g061850.1
c57697_g1_i1	3.86626	Medtr5g034120.1
c54694_g1_i1	3.86573	Medtr7g104610.1
c67394_g1_i1	3.86347	Medtr4g115930.4
c64013_g1_i1	3.86223	Medtr2g016530.1
c25354_g1_i1	3.85255	Medtr3g462080.1
c75796_g1_i1	3.84585	Medtr3g466180.1
c75158_g1_i2	3.84414	AT1G76130.1
c55718_g1_i1	3.84333	Medtr4g130250.1
c63101_g1_i2	3.84133	Medtr8g080380.1
c79926_g2_i1	3.8382	Medtr6g086270.1
c75706_g1_i1	3.83726	Glyma.19G020700.1.p
c60408_g1_i1	3.83521	Medtr3g081440.1
c23345_g1_i1	3.83509	Medtr3g074730.1
c70114_g1_i1	3.82615	Medtr7g050425.1
c71788_g1_i1	3.82615	Medtr8g023860.1
c78578_g1_i2	3.80361	Medtr4g077803.1
c79575_g1_i1	3.80254	Medtr0189s0030.1
c80527_g3_i1	3.80072	Medtr3g069190.1
c77674_g1_i1	3.79808	Medtr1g050730.1
c73294_g1_i1	3.78785	Medtr2g089670.1
c64062_g1_i1	3.7808	Medtr2g025470.1
c68698_g1_i3	3.77758	Medtr3g048860.1
c62848_g1_i1	3.77694	Medtr1g075330.1
c78090_g1_i1	3.77138	Medtr7g068910.1
c67081_g1_i2	3.76586	Medtr5g066760.1
c70007_g2_i1	3.76578	Medtr2g038510.1
c73144_g1_i2	3.76231	Medtr7g407010.1
c58854_g1_i1	3.76125	Medtr8g469540.1
c60925_g1_i1	3.75944	Medtr2g045445.1
c67008_g2_i1	3.75894	Medtr4g076520.1
c72941_g1_i1	3.75213	Medtr2g018175.1
c76461_g1_i2	3.7516	Medtr4g016510.1
c80900_g1_i2	3.74905	Glyma.07G077700.2.p
c72288_g1_i1	3.7373	Glyma.13G247200.1.p
c71035_g1_i2	3.73294	Medtr1g027050.1
c66913_g1_i1	3.72865	Medtr7g105640.1
c64294_g1_i1	3.72439	Medtr3g097240.3
c60136_g1_i1	3.72246	Medtr5g057040.1
c67109_g1_i1	3.71855	Medtr8g041940.1
c9657_g1_i1	3.71771	Medtr2g030600.1
c80730_g3_i1	3.71757	Medtr4g094248.1
c80430_g1_i1	3.71618	Medtr6g042660.1
c67424_g1_i1	3.71068	Medtr1g047670.1
c70424_g1_i1	3.71021	Medtr8g027200.1
c63969_g1_i1	3.70853	Glyma.15G194200.4.p
c70985_g1_i1	3.70576	Medtr4g113270.2
c55578_g1_i1	3.70534	Medtr8g071300.1
c52419_g1_i1	3.70168	Medtr8g023445.1
c77802_g1_i2	3.70105	Medtr2g089970.1
c51871_g1_i1	3.69976	Medtr3g009400.1
c2991_g1_i1	3.69892	Medtr5g014720.1
c67660_g1_i2	3.69587	Medtr5g045200.1
c78039_g1_i1	3.69521	Medtr3g464580.3
c79865_g1_i2	3.69359	Medtr6g471270.1
c69915_g1_i1	3.69048	Medtr7g072510.1
c68888_g1_i2	3.68483	Glyma.08G253400.1.p
c67792_g1_i1	3.68366	Medtr8g468330.1
c73497_g1_i1	3.68321	Medtr5g082750.1
c62450_g1_i1	3.68173	Medtr1g098300.1
c64386_g1_i1	3.68082	Medtr4g068220.1
c77641_g1_i1	3.67924	Medtr0035s0150.1
c52725_g2_i1	3.67906	Medtr5g095840.1
c58355_g1_i2	3.67857	Medtr4g005730.3
c80097_g2_i1	3.67391	Medtr5g066380.1
c74198_g1_i1	3.67283	Medtr2g018590.1
c63928_g1_i1	3.6709	Medtr1g102230.1
c71485_g1_i1	3.66984	Medtr4g019450.1
c66049_g1_i2	3.66932	Medtr8g069785.1
c76810_g1_i1	3.66361	Medtr0144s0030.1
c61845_g1_i1	3.66206	Medtr7g101890.1
c74741_g1_i1	3.6606	Medtr0062s0020.1
c65108_g1_i1	3.659	Medtr6g008620.1
c63327_g1_i1	3.65873	Medtr3g103070.2
c60097_g1_i1	3.65132	Medtr4g116273.1
c59305_g1_i1	3.64837	Medtr8g088520.1
c80232_g1_i2	3.64714	Medtr4g082590.1
c61702_g1_i1	3.64163	Medtr8g069780.1
c78145_g1_i3	3.64148	Medtr0019s0100.1
c64851_g1_i1	3.63936	Medtr1g088260.1
c58206_g1_i1	3.63376	Medtr4g132000.1
c66823_g1_i1	3.63164	Medtr2g079490.1
c77889_g1_i1	3.62968	Medtr1g077890.1
c72151_g1_i1	3.62779	Medtr3g062570.2
c56220_g1_i1	3.62755	Medtr1g017570.1
c76141_g1_i1	3.62658	Medtr2g075590.1
c51732_g1_i1	3.62593	Medtr2g090115.1
c66876_g1_i1	3.62373	Medtr8g089530.1
c64056_g1_i1	3.62134	Medtr5g004720.1
c68559_g1_i1	3.61928	Medtr6g011610.1
c71089_g1_i1	3.61471	Medtr3g070810.1
c67569_g2_i2	3.61463	Glyma.04G190900.1.p
c65693_g1_i1	3.61429	Medtr1g084010.1
c5248_g1_i1	3.60765	Medtr1g012020.1
c73664_g2_i1	3.60765	Medtr8g041150.1
c62675_g1_i1	3.60661	Medtr5g020060.1
c58046_g1_i1	3.60498	Medtr2g020440.2
c63525_g1_i3	3.60077	Medtr4g114060.2
c81816_g1_i1	3.59842	Medtr5g011430.1
c61588_g2_i1	3.59641	Medtr3g073780.1
c55534_g1_i1	3.59602	Medtr6g059330.1
c22526_g1_i2	3.58952	Medtr4g133600.2
c61408_g1_i1	3.58758	Medtr5g069600.1
c65603_g1_i1	3.58696	Medtr1g111990.1
c70947_g1_i1	3.58661	Medtr8g030800.1
c60891_g1_i1	3.58525	Medtr8g099535.1
c74339_g2_i1	3.58454	Medtr8g090105.1
c66779_g1_i4	3.58422	Medtr3g011420.1
c78226_g1_i3	3.57552	Medtr2g041070.1
c78525_g2_i1	3.57044	AT4G04720.1
c79443_g2_i1	3.56943	Medtr7g096870.1
c70324_g1_i3	3.56596	Medtr1g034230.1
c56207_g1_i1	3.5654	Medtr1g088880.1
c74722_g1_i1	3.56405	Medtr4g081870.1
c73187_g1_i1	3.56269	Medtr5g070850.1
c67139_g1_i1	3.56225	Medtr7g090940.2
c72751_g2_i5	3.56047	Medtr6g073650.1
c70260_g1_i1	3.5575	Medtr2g061790.2
c78702_g1_i1	3.55472	Medtr0014s0440.3
c67643_g1_i2	3.5544	Medtr2g010350.1
c72583_g2_i1	3.55434	Medtr6g083730.1
c53546_g1_i1	3.55195	AT4G23160.1
c64042_g1_i1	3.55193	AT4G23160.1
c80174_g1_i4	3.55093	Medtr1g075310.1
c62185_g1_i1	3.5502	Glyma.07G196600.1.p
c74150_g1_i3	3.54996	Medtr8g018100.1
c60062_g1_i1	3.5492	Medtr8g107070.1
c57530_g1_i1	3.54584	Medtr8g091670.1
c77820_g1_i1	3.54393	Medtr4g088770.1
c66360_g1_i1	3.54393	Glyma.19G081500.1.p
c49591_g1_i2	3.53538	Medtr3g093000.1
c69007_g1_i1	3.53462	Medtr3g070890.3
c79859_g1_i3	3.5228	Medtr1g068830.1
c68348_g1_i4	3.51263	Medtr7g013820.1
c54030_g1_i1	3.51163	Medtr8g099340.1
c78534_g1_i2	3.5057	Medtr7g062280.1
c18704_g1_i1	3.4992	Glyma.18G190900.1.p
c75247_g1_i1	3.4948	Medtr7g010800.1
c64499_g1_i2	3.48823	Medtr7g010750.1
c63766_g1_i1	3.48154	Medtr3g093120.1
c62178_g1_i1	3.4769	Medtr4g006970.1
c75774_g1_i1	3.47379	Medtr5g091060.1
c79143_g2_i1	3.46925	Medtr3g437580.1
c40811_g1_i1	3.46655	Glyma.06G180800.1.p
c59494_g1_i1	3.46549	Medtr3g037330.2
c61585_g1_i1	3.46377	Medtr3g095680.2
c67964_g1_i1	3.45666	Medtr4g113710.1
c82121_g1_i2	3.45466	ATMG00710.1
c59656_g1_i1	3.45377	Medtr5g094840.1
c64361_g1_i1	3.44971	Medtr8g059125.1
c78145_g1_i2	3.44559	Medtr0019s0100.1
c75765_g1_i1	3.44148	Medtr3g109120.3
c61183_g1_i1	3.44146	Medtr1g083290.1
c70213_g1_i2	3.43504	Medtr4g128570.1
c80201_g1_i2	3.43184	Medtr0014s0440.2
c76732_g1_i3	3.42998	Medtr2g089450.1
c66782_g1_i2	3.42958	Medtr8g069283.1
c69905_g1_i1	3.42654	Medtr5g096820.1
c75899_g1_i2	3.41985	Medtr6g016480.1
c81452_g1_i2	3.4178	Medtr8g027870.1
c47288_g1_i1	3.41631	Medtr8g101640.2
c76809_g3_i2	3.41493	Medtr6g071430.2
c56080_g1_i1	3.412	Medtr6g082980.1
c44300_g1_i1	3.4106	Medtr1g017700.1
c72117_g1_i1	3.40898	Medtr7g068770.1
c67071_g1_i1	3.40576	Medtr6g083900.1
c81026_g2_i1	3.39939	Medtr4g021470.1
c70704_g1_i1	3.39845	Medtr4g035100.3
c46543_g1_i1	3.39387	Medtr3g077000.1
c72304_g1_i1	3.3902	Medtr3g117850.1
c69591_g1_i1	3.38972	Medtr5g016890.1
c77509_g2_i1	3.38955	Medtr5g032720.1
c81894_g1_i3	3.38648	Medtr8g090165.1
c79592_g1_i5	3.38495	Medtr7g020980.1
c74045_g1_i1	3.38337	Medtr5g005920.1
c37587_g1_i1	3.38098	Medtr1g007030.1
c65298_g1_i3	3.37947	Medtr5g083910.1
c80281_g1_i2	3.37889	Medtr8g008820.1
c56713_g1_i1	3.37803	Medtr0268s0050.1
c54405_g1_i2	3.37644	Medtr8g009980.1
c81497_g1_i3	3.37483	Medtr3g466590.1
c72290_g1_i1	3.3722	Medtr3g101780.2
c45937_g1_i1	3.37187	Medtr7g062990.1
c81898_g3_i2	3.36875	Medtr2g082770.1
c44527_g1_i1	3.36775	Medtr7g117200.1
c60721_g1_i1	3.36688	Medtr5g037340.2
c75030_g1_i1	3.36365	Medtr5g042590.1
c73451_g2_i1	3.36309	Medtr8g080370.1
c69020_g2_i1	3.36177	Medtr8g094290.1
c71998_g1_i2	3.36008	Medtr4g133890.2
c71835_g1_i1	3.35973	Medtr7g100390.1
c79413_g1_i3	3.35866	Medtr6g029460.1
c78900_g1_i1	3.3537	Medtr8g104520.1
c73583_g1_i1	3.35303	Medtr7g072270.1
c70655_g1_i1	3.35232	Medtr7g079350.1
c72435_g3_i1	3.35218	Medtr2g085300.1
c66765_g1_i1	3.345	Medtr4g098930.1
c79969_g1_i3	3.34126	Medtr5g037400.1
c67863_g1_i1	3.33733	Medtr3g108360.1
c67981_g1_i3	3.33289	Medtr8g072510.1
c73970_g1_i1	3.33253	Medtr3g090860.1
c77788_g1_i3	3.33241	Medtr5g096820.1
c76811_g1_i1	3.33235	Medtr7g088790.1
c47575_g1_i1	3.33142	Medtr2g013010.1
c71953_g1_i1	3.32991	Medtr4g089060.1
c62206_g1_i1	3.32868	Medtr5g078270.1
c64800_g1_i1	3.32783	Medtr2g090710.1
c72383_g1_i1	3.32246	Medtr5g010590.1
c73227_g1_i1	3.31954	Medtr4g035330.1
c81084_g3_i2	3.31938	Medtr7g014200.1
c59943_g1_i1	3.31734	Medtr8g012080.1
c67852_g1_i1	3.31621	Medtr1g074170.1
c61532_g1_i1	3.31587	Medtr5g073450.1
c64479_g1_i1	3.314	Medtr0022s0430.1
c78138_g1_i1	3.31179	Medtr3g085050.2
c77179_g1_i2	3.3092	Medtr6g082920.1
c72239_g1_i1	3.30351	Medtr3g100120.1
c74595_g1_i1	3.3021	Medtr8g015910.1
c71579_g3_i1	3.3008	Medtr6g025730.1
c80777_g1_i1	3.3006	Medtr4g092760.1
c77728_g1_i3	3.30038	Medtr1g027880.1
c79669_g1_i2	3.29798	Medtr7g077870.1
c81900_g1_i3	3.29657	Medtr2g040970.3
c66786_g1_i2	3.29608	Medtr8g076940.1
c73845_g2_i1	3.29114	Medtr3g088440.2
c62895_g1_i1	3.28707	Medtr3g095080.1
c73719_g1_i1	3.28085	Medtr6g053620.2
c53285_g1_i1	3.27985	Medtr2g016200.1
c65840_g1_i1	3.27609	Medtr1g012480.5
c65829_g1_i1	3.27608	Medtr1g066940.8
c80392_g1_i1	3.2736	Medtr4g057200.1
c78531_g1_i3	3.2723	Medtr2g101920.1
c70240_g1_i1	3.27112	Medtr5g069480.4
c80966_g1_i3	3.26986	Medtr7g079350.1
c79980_g1_i2	3.26846	Medtr3g046875.1
c79982_g1_i1	3.26794	Medtr1g050478.1
c71009_g1_i1	3.26327	Medtr5g078040.1
c75095_g1_i5	3.25486	Medtr2g450870.1
c65707_g1_i1	3.24966	Medtr7g075030.1
c74360_g1_i1	3.24886	Medtr4g047870.2
c72560_g1_i1	3.24094	Medtr6g015010.1
c79672_g4_i1	3.23848	Medtr1g007160.1
c72471_g1_i3	3.23799	Medtr2g083650.1
c77355_g1_i1	3.23156	Medtr5g082520.1
c68852_g1_i2	3.22736	Medtr4g057470.1
c81696_g1_i1	3.22649	Medtr1g046350.1
c69003_g1_i2	3.22617	Medtr5g060950.1
c67902_g1_i1	3.22477	Medtr4g103840.1
c79875_g1_i1	3.22181	Medtr5g072930.1
c70407_g1_i2	3.22141	Medtr2g038000.1
c49554_g1_i2	3.21902	Medtr3g088855.1
c66040_g1_i1	3.217	Medtr2g435490.1
c79033_g2_i1	3.21525	Medtr4g126970.1
c69772_g2_i1	3.21467	Medtr1g086520.1
c69213_g1_i2	3.21314	Medtr2g069420.1
c75917_g1_i1	3.21086	Medtr3g077080.2
c69196_g1_i2	3.20413	Medtr5g079890.1
c61812_g1_i1	3.20068	Medtr4g101880.1
c68719_g1_i1	3.19598	Medtr4g095450.1
c71807_g2_i1	3.19487	Medtr2g096950.1
c64266_g1_i1	3.19149	Medtr6g053150.1
c75710_g1_i2	3.18583	Medtr2g064415.1
c80879_g2_i1	3.18407	Medtr8g080050.1
c75211_g1_i1	3.1831	Medtr2g436540.1
c72235_g1_i2	3.17989	Medtr1g041885.1
c70161_g1_i1	3.17587	Medtr4g061050.1
c72152_g1_i1	3.17246	Glyma.08G070000.1.p
c54257_g1_i2	3.17224	Medtr1g080800.1
c22768_g1_i1	3.16879	Glyma.05G206500.1.p
c69849_g2_i1	3.16304	Medtr8g028800.1
c66903_g1_i1	3.16074	Medtr4g073840.1
c43332_g1_i1	3.15893	Medtr2g081980.1
c78395_g1_i1	3.15249	Medtr3g022930.1
c70214_g1_i1	3.15158	Medtr4g130540.1
c74134_g2_i1	3.14831	Medtr2g007510.1
c77009_g1_i2	3.14779	Medtr7g026520.1
c62034_g1_i1	3.13888	Medtr3g103040.2
c69306_g2_i7	3.13876	Medtr5g084530.2
c60165_g1_i1	3.13391	Medtr8g069400.1
c64067_g1_i1	3.133	Medtr2g019190.1
c78329_g1_i2	3.13271	Medtr6g052455.1
c75452_g1_i2	3.13221	Medtr3g103590.1
c71355_g1_i1	3.13204	Medtr1g044795.1
c80577_g1_i2	3.12699	Medtr4g005410.1
c79997_g1_i3	3.12684	Medtr3g462390.1
c21557_g1_i1	3.12464	Medtr1g116370.1
c80201_g1_i1	3.12429	Medtr0014s0440.2
c80712_g1_i1	3.12379	Medtr1g035130.6
c81044_g1_i1	3.12191	Medtr1g009680.2
c64522_g1_i1	3.11776	Medtr1g087300.1
c79323_g1_i1	3.11753	Glyma.19G013200.1.p
c44261_g1_i1	3.11468	Medtr4g109140.1
c75798_g1_i1	3.11323	Medtr7g083410.1
c71671_g1_i1	3.10868	Medtr2g027010.1
c71399_g1_i1	3.10688	Medtr6g013220.1
c75578_g1_i1	3.10653	Medtr7g112560.1
c73116_g1_i3	3.10536	Medtr3g030055.1
c77839_g1_i2	3.10329	Medtr5g098310.4
c71749_g1_i1	3.10231	Glyma.08G093600.1.p
c73543_g1_i1	3.10137	Medtr2g038080.2
c73979_g1_i2	3.101	Medtr3g108240.3
c68392_g1_i1	3.09817	Medtr4g107290.2
c49607_g1_i1	3.09466	Glyma.03G126500.1.p
c55419_g1_i1	3.09405	Medtr2g089080.1
c81316_g1_i2	3.09369	Medtr1g009190.1
c68952_g1_i1	3.08857	Medtr4g011230.1
c78614_g1_i1	3.08002	Medtr2g024970.1
c79237_g1_i2	3.07685	Medtr3g452360.2
c73766_g1_i1	3.07373	Medtr2g040240.1
c68275_g1_i1	3.07182	Medtr3g086670.1
c66351_g1_i1	3.06621	Medtr4g119850.1
c69852_g1_i1	3.06517	Medtr4g089105.1
c79768_g1_i4	3.0593	Medtr1g026140.1
c80149_g1_i1	3.05852	Medtr1g103680.1
c64225_g1_i1	3.0564	Medtr4g120760.1
c77645_g1_i3	3.05449	Medtr1g031530.1
c58959_g1_i1	3.05347	AT2G24720.1
c43084_g1_i1	3.05313	Medtr3g056240.1
c58617_g1_i1	3.05133	Medtr1g026078.2
c57800_g1_i1	3.04742	Medtr4g083580.1
c54457_g1_i1	3.04597	Medtr1g114070.1
c61945_g1_i1	3.0348	Medtr7g055720.1
c54746_g1_i1	3.03093	Medtr3g056270.1
c82116_g2_i2	3.03017	Medtr3g011820.1
c44575_g1_i1	3.03001	Medtr3g006170.1
c78775_g1_i5	3.02984	Medtr3g088150.1
c68718_g1_i2	3.02913	Glyma.20G211400.1.p
c58129_g1_i1	3.02758	Medtr7g006750.1
c74469_g1_i1	3.02649	Glyma.05G002500.1.p
c71540_g1_i1	3.02469	Medtr8g063460.1
c67259_g1_i2	3.02381	Medtr5g089520.1
c70688_g1_i3	3.01782	Medtr5g013610.1
c77803_g2_i2	3.01776	Medtr1g073740.1
c75509_g2_i1	3.01028	Medtr5g007520.1
c74900_g1_i2	3.00769	Medtr4g459450.1
c78151_g1_i2	3.00685	Medtr6g013820.1
c77919_g1_i1	3.00563	Medtr4g085890.1
c75771_g3_i1	3.00509	Medtr8g095140.1
c75619_g1_i1	3.00386	Medtr8g071900.1
c64246_g1_i1	3.00233	Medtr2g022780.2
c74052_g2_i1	3.00137	Medtr2g091175.1
c72327_g2_i1	2.99898	Medtr4g129500.2
c69763_g1_i1	2.99727	Glyma.06G319900.1.p
c68648_g1_i1	2.98806	Medtr5g090020.1
c60722_g2_i1	2.98592	Medtr7g102860.2
c76698_g1_i1	2.98184	Medtr5g076180.5
c74563_g1_i2	2.97878	Medtr8g085900.1
c65301_g2_i1	2.97815	Medtr8g096660.1
c65562_g1_i1	2.9705	Medtr4g130490.4
c69140_g1_i1	2.97007	Medtr3g110450.1
c55781_g1_i1	2.96797	Medtr4g126780.1
c63907_g1_i1	2.96727	Medtr2g020860.3
c70110_g1_i1	2.96684	Medtr8g076820.1
c73204_g1_i1	2.96648	Medtr6g023910.1
c71136_g1_i2	2.9634	Medtr8g101480.1
c75334_g1_i1	2.95742	ATMG01360.1
c70444_g1_i1	2.95552	Medtr6g079540.2
c52164_g1_i1	2.95394	Medtr3g464030.1
c61627_g1_i1	2.9527	Medtr1g078420.2
c70523_g1_i2	2.95169	Medtr5g012850.5
c62050_g1_i1	2.94886	Medtr1g089760.1
c71544_g2_i2	2.946	Medtr1g114690.4
c69392_g1_i3	2.94232	Medtr2g438720.1
c79411_g2_i1	2.94083	Medtr5g023980.1
c58251_g1_i1	2.93933	Glyma.12G239800.1.p
c64924_g1_i1	2.93087	Medtr8g096920.1
c78653_g2_i1	2.92667	Medtr2g089440.2
c79554_g1_i3	2.92627	Medtr6g033280.1
c68482_g1_i1	2.92522	Medtr7g085220.1
c53402_g1_i1	2.92146	Medtr7g092050.1
c63819_g1_i1	2.91758	Medtr4g102530.2
c78876_g1_i2	2.91653	Medtr4g052300.1
c60404_g1_i1	2.91288	Medtr1g105600.1
c69466_g1_i1	2.91149	Medtr4g076980.1
c68584_g1_i1	2.91118	Medtr2g095700.1
c80149_g2_i1	2.90949	Medtr1g103680.1
c80497_g2_i2	2.90934	Medtr4g051698.1
c80645_g1_i4	2.90671	Glyma.05G136300.1.p
c77249_g1_i2	2.90224	Medtr4g052800.1
c80619_g1_i1	2.89543	Medtr3g030540.1
c56948_g1_i1	2.89282	Medtr3g111120.1
c72288_g2_i2	2.89064	Medtr4g091490.1
c64871_g1_i1	2.89047	Medtr8g099495.1
c56209_g1_i1	2.8903	Medtr1g017830.1
c79563_g2_i1	2.88826	Medtr2g022480.1
c71822_g1_i3	2.88399	Medtr0002s0040.1
c75507_g1_i3	2.88283	Medtr5g062230.1
c74246_g1_i2	2.88226	Medtr4g077650.1
c66281_g1_i1	2.88116	Medtr6g007170.1
c77884_g1_i1	2.87583	Medtr8g072350.1
c67646_g1_i1	2.87238	Medtr7g098750.2
c69265_g2_i1	2.86836	Medtr7g103300.1
c69586_g1_i2	2.86566	Medtr1g032160.1
c59577_g1_i1	2.86027	Medtr4g100700.2
c75833_g1_i1	2.86022	Medtr7g013820.1
c81590_g1_i1	2.85916	Medtr6g007757.1
c69510_g1_i1	2.85592	ATMG00730.1
c67790_g1_i1	2.85444	Medtr3g065480.1
c68291_g1_i1	2.85427	Medtr4g087895.1
c54922_g1_i1	2.85371	Medtr1g100145.1
c64366_g2_i1	2.84945	Medtr2g015590.1
c53441_g1_i1	2.84328	Glyma.09G012900.1.p
c81763_g2_i1	2.84108	Medtr6g034030.2
c73150_g1_i1	2.83799	Medtr1g077030.1
c68969_g2_i1	2.83757	Medtr7g082300.1
c70902_g1_i1	2.83723	Medtr7g081780.1
c72452_g1_i1	2.83315	Medtr7g107060.2
c70828_g1_i1	2.83241	Medtr5g089820.1
c79788_g1_i2	2.82904	Medtr7g021850.1
c59115_g1_i1	2.82175	Medtr1g050505.1
c80609_g1_i1	2.81877	Medtr4g037105.1
c80763_g2_i1	2.81728	Medtr7g096680.1
c72353_g1_i1	2.81457	Medtr3g100690.1
c66164_g1_i1	2.80806	Medtr3g117290.1
c61699_g1_i1	2.80741	Medtr4g128310.2
c75801_g1_i2	2.80639	Medtr6g004800.1
c76360_g1_i1	2.80499	Medtr6g007490.1
c69091_g1_i1	2.80422	Medtr7g105070.1
c65660_g1_i1	2.80186	Medtr4g019225.1
c75599_g1_i1	2.80032	Medtr4g048330.1
c77794_g1_i1	2.79823	Medtr5g056480.1
c77267_g1_i3	2.7979	Medtr2g089765.1
c59809_g1_i1	2.79156	Medtr2g031380.2
c76082_g1_i1	2.79035	Medtr3g070010.1
c64938_g1_i1	2.79009	Medtr2g438140.1
c76476_g1_i2	2.78659	Medtr8g006910.1
c70607_g1_i1	2.78636	Medtr4g058740.1
c59218_g1_i1	2.78232	Glyma.16G029900.2.p
c76159_g2_i1	2.78108	Medtr5g009080.1
c78353_g2_i1	2.7806	Medtr4g087110.1
c72085_g1_i3	2.77997	Medtr4g089095.1
c81247_g2_i1	2.77848	Medtr5g062190.1
c61837_g1_i1	2.77511	Medtr3g053340.1
c65573_g1_i1	2.7665	Medtr3g006370.1
c77104_g1_i2	2.76647	Medtr4g086835.1
c62611_g1_i1	2.76385	Medtr4g071360.1
c70523_g1_i1	2.76289	Medtr5g012850.5
c64792_g1_i1	2.75508	Medtr5g068060.1
c67281_g1_i1	2.75477	Medtr5g077540.1
c55082_g1_i1	2.75425	Medtr4g119780.1
c78214_g1_i1	2.75339	Medtr7g072420.1
c86227_g1_i1	2.75316	Medtr3g106700.1
c58013_g1_i1	2.74793	Medtr1g087710.1
c70147_g1_i1	2.7453	Medtr1g057130.1
c82105_g2_i3	2.74463	Medtr8g031480.1
c57616_g1_i1	2.74327	Medtr7g065130.1
c66500_g1_i1	2.73923	AT5G02500.2
c65989_g1_i1	2.73676	Medtr2g044040.1
c72527_g1_i1	2.73404	Medtr3g100470.1
c64379_g1_i1	2.73403	Medtr6g027510.1
c61090_g1_i2	2.73139	Medtr4g113600.1
c81840_g1_i2	2.72795	Medtr2g451540.1
c64886_g1_i1	2.72364	Medtr4g057635.1
c73172_g1_i1	2.72162	Medtr5g035830.1
c77741_g1_i1	2.71983	Medtr7g068810.1
c54822_g1_i1	2.71541	Medtr6g092790.1
c77404_g2_i2	2.71287	Medtr3g098840.1
c71086_g1_i1	2.71202	Medtr5g010635.1
c77114_g2_i1	2.70963	Medtr8g079790.1
c63401_g1_i1	2.7092	Medtr2g021690.1
c76963_g1_i1	2.70026	Medtr2g437880.1
c67220_g1_i1	2.69657	Medtr5g085790.1
c68930_g1_i1	2.69109	Glyma.08G141300.1.p
c69328_g1_i1	2.68695	Medtr5g069480.2
c80962_g2_i1	2.68422	Medtr6g016260.1
c61628_g1_i1	2.68265	Medtr7g026095.1
c76204_g1_i1	2.68248	Medtr5g077170.1
c69600_g1_i1	2.67123	Medtr3g099010.1
c73217_g1_i1	2.66836	Medtr1g050520.1
c55283_g1_i1	2.66728	Medtr4g124960.1
c69928_g1_i1	2.66369	Medtr7g102820.1
c76314_g1_i1	2.65938	Medtr3g069050.1
c63070_g1_i1	2.65548	Medtr3g451150.1
c81002_g1_i2	2.65429	Medtr6g073110.1
c80672_g1_i1	2.64724	Medtr3g084410.1
c57547_g1_i1	2.64435	Medtr1g066400.2
c70067_g1_i1	2.64361	Glyma.08G097800.1.p
c57802_g1_i1	2.64334	Medtr8g102160.1
c78395_g1_i3	2.64322	Medtr3g022930.1
c78434_g1_i1	2.63981	Medtr8g079400.1
c69844_g1_i1	2.6395	Medtr1g105020.1
c77865_g1_i2	2.6383	Medtr3g116860.1
c63299_g1_i1	2.63555	Medtr4g076760.1
c78783_g1_i2	2.63414	Medtr2g030380.1
c79685_g1_i2	2.63303	Medtr5g021240.1
c76406_g1_i1	2.63291	Medtr4g082510.3
c79943_g1_i6	2.63208	Medtr3g105990.1
c78969_g1_i2	2.63167	Medtr2g008360.1
c78166_g2_i1	2.62754	Medtr0027s0030.1
c71476_g1_i2	2.62613	Medtr1g016440.1
c81894_g2_i1	2.61945	Medtr8g090165.1
c80397_g1_i2	2.61373	Medtr7g105430.1
c71544_g2_i3	2.60834	Medtr1g114690.4
c78314_g1_i1	2.60456	Medtr5g068820.2
c78097_g1_i1	2.6009	Medtr4g078860.4
c76886_g1_i4	2.60028	Medtr7g114850.1
c78185_g1_i1	2.59675	Medtr5g012870.1
c80843_g1_i2	2.59466	Medtr2g461610.1
c78618_g1_i2	2.59069	Medtr4g079510.1
c80619_g1_i2	2.58643	Medtr2g060350.1
c72623_g1_i1	2.58208	Medtr2g035080.1
c64848_g1_i1	2.58025	Medtr4g108260.1
c76369_g1_i1	2.57948	Glyma.08G096800.1.p
c66683_g1_i1	2.57636	Medtr3g096310.1
c63239_g1_i1	2.57315	Medtr6g061690.1
c75975_g2_i1	2.56544	Medtr3g085020.1
c72612_g1_i1	2.56384	Medtr3g092390.1
c80775_g1_i1	2.56133	Medtr5g035665.1
c62937_g1_i1	2.55716	Medtr3g113630.2
c77865_g1_i1	2.55674	Medtr4g070430.3
c68790_g1_i1	2.5535	Medtr6g013220.1
c59256_g1_i1	2.54563	ATMG01170.1
c64298_g1_i1	2.54556	Medtr1g070195.1
c74409_g1_i2	2.54332	Medtr2g066700.1
c75649_g1_i1	2.54233	Medtr3g056700.1
c64036_g1_i1	2.53959	Medtr7g105870.1
c74249_g1_i1	2.53528	Medtr6g005210.1
c69306_g2_i2	2.53491	Medtr5g084530.2
c79431_g1_i1	2.53232	Medtr2g034720.1
c60454_g1_i1	2.53113	Medtr4g133932.1
c75508_g1_i1	2.52977	Medtr7g086780.1
c74822_g1_i1	2.52909	Medtr5g021450.1
c80448_g2_i1	2.52248	Medtr1g011720.1
c62249_g1_i1	2.51689	Medtr4g116480.1
c66571_g1_i1	2.5165	Medtr7g118300.1
c60532_g1_i1	2.5164	Medtr4g090460.1
c69734_g1_i1	2.51384	Medtr8g070640.1
c68123_g1_i1	2.51057	Medtr6g087600.1
c56484_g1_i1	2.5092	Medtr2g008190.1
c77982_g1_i2	2.50817	Medtr4g021350.1
c81336_g1_i1	2.50455	Medtr3g031220.1
c76439_g1_i1	2.50241	Medtr8g020670.1
c70411_g1_i1	2.50237	Medtr4g132430.1
c64043_g2_i1	2.50029	Medtr4g080060.2
c78525_g1_i1	2.49868	Medtr3g051770.1
c72835_g1_i1	2.49641	Medtr7g089140.9
c72883_g3_i1	2.49596	Medtr5g085330.1
c1237_g1_i1	2.49531	Medtr2g015870.1
c70924_g1_i1	2.49121	Medtr7g095220.1
c78893_g1_i6	2.48747	Medtr3g035815.1
c61404_g1_i2	2.48616	Medtr8g035910.1
c67473_g1_i1	2.48246	Medtr1g050760.2
c81737_g1_i1	2.4782	Medtr1g032010.1
c77535_g1_i1	2.4706	Medtr2g011820.1
c72742_g1_i1	2.46897	Medtr5g006070.1
c79550_g1_i3	2.46665	Medtr4g077920.1
c66939_g1_i1	2.46645	Medtr5g019490.1
c69633_g1_i1	2.46086	Medtr4g127120.1
c68362_g1_i1	2.45912	Medtr7g010800.1
c71156_g1_i1	2.45626	Medtr5g011120.1
c80728_g1_i1	2.45241	Medtr4g063710.1
c75095_g1_i3	2.45078	Medtr2g450870.1
c81242_g1_i1	2.45061	Medtr8g468030.1
c82102_g1_i1	2.44993	Medtr3g024330.1
c81312_g2_i1	2.44096	Glyma.16G062800.1.p
c8198_g1_i1	2.43345	Medtr2g078050.1
c71235_g1_i1	2.43091	Medtr4g082330.1
c76614_g1_i1	2.42895	Medtr8g038100.1
c79560_g1_i1	2.42812	Medtr4g044110.1
c64146_g1_i1	2.42245	Medtr8g107730.1
c78042_g1_i1	2.42	Medtr6g083980.1
c73571_g1_i2	2.41987	Glyma.02G044000.1.p
c77690_g2_i4	2.41881	Medtr3g105190.2
c76866_g1_i1	2.41738	Medtr2g438140.1
c72635_g1_i3	2.41383	Medtr8g096880.1
c71588_g1_i1	2.41352	Medtr1g016120.1
c68133_g1_i2	2.41324	Glyma.18G245800.2.p
c65563_g1_i1	2.41227	Medtr3g112530.1
c71168_g2_i1	2.40897	Medtr6g087590.1
c71066_g2_i1	2.40673	Medtr7g015190.2
c59940_g1_i1	2.4028	Medtr3g087980.1
c75178_g1_i1	2.40248	Medtr8g089500.1
c75136_g1_i2	2.40065	Medtr1g096990.1
c73393_g1_i1	2.39862	Medtr8g039090.1
c51699_g1_i1	2.39826	Medtr3g085890.1
c74885_g1_i2	2.3957	Glyma.15G066500.1.p
c78035_g1_i1	2.39025	Medtr8g031080.1
c67441_g1_i1	2.38378	Medtr2g030160.1
c75446_g1_i1	2.37976	Glyma.16G204600.1.p
c63910_g1_i1	2.3785	Medtr7g029555.1
c81740_g1_i1	2.37508	Medtr7g022310.1
c77241_g1_i1	2.3678	Medtr1g093780.1
c69077_g1_i1	2.36761	Medtr8g033290.1
c81751_g1_i1	2.36592	Medtr6g053510.2
c49795_g1_i1	2.36257	Medtr4g063190.1
c68004_g1_i1	2.35813	Glyma.11G165800.1.p
c66445_g1_i1	2.35591	Medtr4g128580.1
c64015_g1_i1	2.35234	Medtr1g076250.1
c69565_g1_i1	2.34888	Medtr1g008050.1
c81229_g3_i1	2.34391	Medtr2g072180.2
c34028_g1_i1	2.34364	Medtr2g087660.1
c78627_g1_i1	2.3423	Medtr4g011820.1
c79540_g1_i1	2.34036	Glyma.02G013700.1.p
c80665_g3_i3	2.33972	Medtr4g036080.1
c71685_g1_i1	2.33927	Medtr1g050670.2
c78518_g1_i2	2.33618	Medtr7g073650.1
c75712_g1_i1	2.3356	Medtr5g065980.2
c71708_g1_i1	2.33471	Medtr7g029540.1
c68267_g1_i2	2.33319	Medtr3g055330.1
c79842_g1_i1	2.32712	Medtr1g080250.1
c80304_g1_i1	2.3262	Medtr6g083020.1
c79594_g1_i4	2.32102	Medtr7g092360.3
c68597_g1_i2	2.31586	Medtr5g063390.1
c75409_g2_i2	2.31482	Medtr7g113050.1
c76628_g1_i1	2.31421	Medtr2g100630.2
c77854_g1_i2	2.30718	Medtr5g075260.2
c77112_g1_i1	2.30635	Medtr5g022880.1
c73576_g1_i1	2.29055	Medtr1g025420.1
c61096_g1_i1	2.28158	Medtr5g024320.1
c78331_g1_i3	2.27484	Medtr7g074150.1
c58921_g1_i1	2.27396	Medtr4g117050.1
c73382_g1_i1	2.27236	Medtr4g107010.1
c52088_g1_i1	2.26787	Medtr3g087590.2
c82096_g1_i1	2.26753	Glyma.07G103000.3.p
c64424_g1_i1	2.26424	Medtr5g069330.1
c76600_g1_i1	2.25731	Medtr2g055850.1
c75883_g1_i1	2.25543	Glyma.07G049700.1.p
c73701_g1_i1	2.25444	Medtr4g124040.5
c80944_g1_i1	2.2532	Medtr3g115340.1
c79732_g3_i1	2.2518	Medtr5g464340.1
c76020_g1_i1	2.24253	Medtr5g043880.1
c58341_g1_i1	2.23698	Medtr7g108735.1
c77767_g1_i5	2.23461	Medtr2g100560.1
c71227_g1_i1	2.23314	Medtr5g066840.1
c66132_g1_i1	2.23157	Medtr1g041240.2
c80296_g1_i1	2.22007	Medtr7g068850.1
c60116_g1_i1	2.22007	Medtr3g083960.1
c80050_g1_i1	2.20982	Medtr1g074950.1
c75454_g1_i1	2.20791	Medtr2g014040.1
c80334_g1_i1	2.20344	Medtr5g099130.1
c81229_g1_i2	2.20293	Medtr2g072180.1
c76184_g1_i1	2.20092	Medtr4g023590.1
c79733_g1_i1	2.19977	Medtr7g073230.1
c82049_g1_i1	2.19647	Medtr6g045307.1
c65439_g1_i1	2.19419	Medtr7g090630.2
c78000_g1_i1	2.19338	Medtr1g109490.1
c73815_g3_i1	2.19275	Medtr2g031990.1
c79913_g1_i1	2.19226	Medtr1g104610.1
c74397_g1_i1	2.19177	Medtr3g013790.1
c81340_g2_i1	2.19045	Medtr7g094660.1
c81847_g2_i2	2.17424	Medtr4g133968.1
c74486_g1_i2	2.16341	Medtr4g120130.1
c80954_g1_i1	2.16294	Medtr4g054920.1
c79129_g2_i2	2.16098	Glyma.08G326700.6.p
c71993_g1_i1	2.15926	Medtr3g088895.2
c75469_g1_i1	2.15912	Medtr6g082500.1
c79311_g2_i1	2.15598	Medtr3g081580.1
c77005_g1_i1	2.15532	Medtr5g030770.1
c80958_g1_i1	2.15518	Medtr3g080500.1
c58222_g1_i2	2.15282	Medtr1g033090.1
c60445_g1_i1	2.15012	Medtr5g064620.1
c76281_g1_i2	2.13525	Medtr4g121080.1
c75451_g1_i1	2.12854	Medtr7g108930.1
c76207_g1_i1	2.12338	Medtr3g033040.1
c64119_g1_i1	2.12213	Medtr7g068550.1
c66266_g1_i1	2.11892	Medtr8g045030.1
c80087_g2_i1	2.11874	Medtr2g032100.1
c66578_g1_i1	2.11098	Medtr2g099820.1
c66570_g1_i1	2.10799	Medtr2g088000.1
c69921_g1_i1	2.10608	Medtr4g106860.1
c72811_g1_i2	2.10481	Medtr4g075790.2
c75666_g1_i1	2.09114	Medtr2g010470.1
c81319_g1_i2	2.09007	Medtr3g106480.1
c81276_g1_i4	2.08983	Medtr5g076960.1
c80182_g1_i2	2.08781	Medtr1g110300.4
c74820_g1_i1	2.08235	Glyma.15G251200.1.p
c81715_g1_i1	2.07146	Medtr8g087425.1
c79350_g1_i2	2.07008	Glyma.08G327200.1.p
c73755_g1_i1	2.06857	Medtr2g091170.1
c69611_g1_i1	2.065	Medtr5g092060.1
c75811_g1_i1	2.06374	Medtr2g064470.1
c81551_g1_i1	2.06292	Medtr0365s0010.1
c73890_g1_i1	2.061	Medtr3g005170.1
c73461_g2_i1	2.05432	Medtr5g096570.1
c80619_g1_i4	2.05308	Medtr2g060350.1
c80744_g1_i1	2.05181	Medtr5g016440.1
c78469_g1_i3	2.05145	Medtr2g090245.1
c78981_g3_i1	2.04784	Medtr5g037540.1
c53023_g1_i1	2.0475	Medtr1g026110.1
c66608_g1_i1	2.04413	Medtr5g026640.1
c58999_g1_i1	2.04379	Medtr4g106690.1
c81336_g2_i1	2.03745	Medtr5g074400.1
c75001_g1_i1	2.03465	Glyma.15G261300.1.p
c74145_g1_i2	2.03374	Medtr4g107930.1
c81947_g1_i1	2.03291	Medtr1g031460.1
c74361_g2_i1	2.01144	Medtr7g110810.1
c80004_g3_i1	2.00941	Medtr1099s0010.1
c80106_g1_i1	2.00551	Medtr8g091390.1
c67036_g1_i2	2.00124	Medtr6g015890.1
c79323_g1_i6	1.99825	Medtr3g467360.2
c72619_g1_i2	1.99755	Medtr2g067980.1
c79102_g2_i1	1.99618	Medtr2g034480.1
c77303_g1_i2	1.99337	Medtr2g461920.1
c71857_g1_i2	1.98707	Medtr8g088110.1
c71857_g2_i1	1.98355	Medtr8g088110.1
c75373_g1_i2	1.97677	Medtr8g094150.1
c74382_g1_i1	1.97329	Medtr7g100120.1
c79666_g1_i1	1.9676	Medtr5g097900.1
c75445_g1_i1	1.96655	Medtr1g014690.1
c70312_g1_i1	1.96565	Medtr5g090910.1
c78132_g1_i1	1.96502	Medtr1g016780.1
c74117_g1_i3	1.96162	Medtr3g112050.1
c78096_g1_i1	1.95741	Medtr1g089310.1
c75374_g1_i1	1.95469	Medtr4g011610.1
c69650_g1_i1	1.95357	Medtr2g094093.1
c78506_g1_i1	1.94881	Medtr3g093780.1
c75967_g2_i1	1.94411	Medtr4g094908.1
c51837_g1_i1	1.94335	Medtr4g116530.1
c75312_g1_i1	1.94335	Medtr3g093970.1
c80750_g1_i1	1.94299	Medtr1g047210.1
c80757_g3_i1	1.94077	Medtr8g104510.1
c79348_g1_i1	1.93413	Medtr3g082750.2
c81791_g1_i1	1.93302	Medtr8g020970.1
c74762_g1_i1	1.91967	Medtr4g107940.1
c80790_g1_i2	1.91814	Glyma.11G180100.1.p
c59624_g1_i2	1.91538	Medtr2g015870.1
c69236_g1_i1	1.91459	Medtr2g084735.1
c75087_g1_i1	1.91206	Medtr1g099280.1
c81561_g1_i4	1.90125	Medtr2g101590.1
c74041_g1_i1	1.89636	Medtr4g065077.1
c80549_g1_i1	1.89543	Medtr6g007760.1
c73545_g1_i1	1.88561	Medtr2g016230.1
c74535_g1_i1	1.88548	Medtr7g113410.1
c62948_g1_i1	1.88484	Medtr2g086190.1
c67786_g1_i1	1.88442	Medtr8g021380.1
c76238_g1_i2	1.87982	Glyma.09G148900.2.p
c76149_g1_i1	1.87969	Glyma.02G037500.1.p
c81522_g1_i4	1.87707	Medtr1g112910.3
c65302_g1_i1	1.87196	Medtr3g064350.1
c80399_g1_i1	1.86939	Medtr1g072420.1
c70255_g1_i1	1.86284	Medtr8g463180.1
c79732_g1_i1	1.86209	Medtr5g064345.1
c79748_g1_i1	1.85605	Medtr4g094730.1
c58307_g1_i1	1.85515	Medtr3g078420.1
c71098_g1_i2	1.8456	Medtr4g125770.3
c68360_g1_i2	1.83457	Medtr7g109145.1
c73983_g1_i1	1.82696	Medtr2g005130.1
c78045_g1_i1	1.82292	Medtr7g114980.1
c45839_g1_i1	1.82079	Medtr6g091770.1
c81934_g1_i2	1.81822	Medtr7g077780.1
c75962_g1_i3	1.81489	Medtr1g031820.1
c73804_g1_i1	1.81337	Medtr7g117980.1
c76899_g1_i1	1.79104	Medtr1g007170.1
c75167_g1_i1	1.79054	Glyma.11G140500.1.p
c77063_g3_i3	1.78015	Medtr7g111980.1
c78213_g1_i1	1.76879	Medtr2g069480.1
c69374_g1_i1	1.76077	Medtr5g023170.1
c73693_g1_i2	1.75858	Medtr3g082720.1
c66501_g1_i1	1.75587	Medtr3g061630.1
c75122_g1_i4	1.75566	Medtr4g131810.1
c70473_g3_i1	1.754	Medtr5g005170.1
c74749_g1_i1	1.74752	Glyma.14G223600.1.p
c68656_g1_i1	1.74727	Medtr8g066350.1
c67880_g1_i1	1.74615	Medtr2g103795.1
c80969_g1_i2	1.74612	Medtr4g024000.2
c81751_g2_i1	1.73364	Medtr6g053510.2
c78365_g2_i1	1.72787	Medtr5g082070.1
c80071_g1_i1	1.71121	Medtr1g029750.1
c49439_g1_i1	1.7065	Medtr8g105630.1
c69306_g2_i4	1.70256	Medtr5g084570.1
c68891_g1_i1	1.66291	Medtr3g115040.1
c77435_g2_i1	1.65966	Medtr4g087110.1
c66585_g1_i1	1.65753	Medtr4g131400.1
c67536_g1_i1	1.65742	Medtr3g096410.1
c74579_g1_i3	1.63804	Medtr4g090580.1
c73579_g1_i1	1.60964	Medtr1g097300.1
c75671_g1_i1	1.57448	Medtr1g484940.2
c70284_g1_i2	1.56098	Medtr4g059530.1
c70868_g1_i1	1.5343	Medtr7g109350.1
c80899_g1_i4	1.43415	Medtr4g131020.2
c77070_g1_i1	1.41227	Glyma.20G164500.1.p
c77792_g1_i1	1.35108	Medtr8g099065.1
c82090_g1_i2	1.29744	Medtr2g046550.1
c67807_g1_i1	1.28031	Medtr1g083620.1
c76627_g1_i1	1.22863	Medtr3g105390.1
c81697_g1_i2	1.02068	Medtr2g435560.1
c79426_g1_i1	0.999986	Glyma.16G039600.1.p
c81562_g1_i4	0.825818	Medtr5g094430.1
c79045_g1_i1	-1.58776	Medtr4g068970.1
c81224_g1_i1	-1.62544	Medtr4g057970.1
c78473_g1_i1	-1.6668	Medtr4g076600.1
c81008_g1_i1	-1.70827	Medtr5g025270.1
c73828_g1_i1	-1.742	Glyma.10G255500.1.p
c79271_g1_i1	-1.8432	Glyma.11G133800.1.p
c78276_g1_i1	-1.85897	Medtr1g061230.1
c65488_g1_i1	-1.87051	Medtr5g016250.1
c78291_g2_i1	-1.90727	Medtr1g105480.1
c70502_g1_i1	-1.91796	Medtr7g101190.1
c70109_g1_i1	-1.96196	Medtr2g012450.1
c81525_g1_i1	-1.96908	Medtr5g096530.1
c46282_g1_i1	-1.99004	Medtr7g118060.2
c73420_g1_i1	-2.03802	Medtr4g099340.1
c82078_g1_i1	-2.04436	Medtr5g059820.1
c76167_g2_i1	-2.06803	Medtr4g063630.1
c81367_g1_i1	-2.07503	Medtr5g064610.1
c81030_g1_i1	-2.07539	Medtr2g076340.1
c74033_g1_i1	-2.09938	Medtr2g069330.1
c78276_g3_i1	-2.10716	Medtr1g061230.1
c62329_g1_i1	-2.1284	Medtr1g064230.1
c66633_g1_i1	-2.13375	Medtr3g101670.1
c73626_g2_i2	-2.1557	Medtr3g098510.1
c69690_g1_i1	-2.15821	Medtr4g079750.1
c60315_g1_i1	-2.1649	Medtr8g088720.1
c75548_g1_i1	-2.21197	Medtr7g011060.1
c60214_g1_i1	-2.2148	Medtr3g037750.1
c47344_g1_i1	-2.24026	Medtr1g023180.1
c80317_g2_i1	-2.24049	Medtr4g015460.1
c69729_g1_i1	-2.2726	Medtr2g079710.1
c65139_g1_i1	-2.27292	Medtr5g096670.1
c63182_g1_i1	-2.28155	Medtr1g012710.1
c73857_g2_i1	-2.34063	Medtr6g011880.1
c68943_g1_i1	-2.37208	Medtr1g059660.1
c73165_g1_i1	-2.48751	Medtr3g100500.1
c71444_g1_i1	-2.53498	Medtr8g100120.1
c74708_g1_i1	-2.55169	Medtr3g460780.1
c74944_g2_i2	-2.60096	Glyma.16G162600.1.p
c75731_g1_i2	-2.6089	Medtr4g128150.1
c69126_g3_i1	-2.65804	Glyma.03G252600.1.p
c71231_g1_i1	-2.69902	Medtr3g436680.1
c50257_g1_i1	-2.77018	Medtr8g104140.1
c69862_g1_i1	-2.77288	Medtr7g007120.1
c62531_g1_i1	-2.86505	Medtr1g008590.1
c55063_g1_i2	-2.88303	Medtr4g117470.1
c77200_g1_i3	-2.90627	Medtr1g090973.1
c70155_g1_i1	-2.97133	Medtr4g119600.1
c73314_g1_i1	-2.9774	Medtr7g109600.1
c70046_g2_i1	-2.9946	Medtr4g088150.1
c74944_g2_i1	-3.10919	Glyma.16G162600.1.p
c69812_g1_i2	-3.13564	Medtr0332s0040.1
c70863_g2_i2	-3.17911	Medtr1g063180.1
c64998_g1_i2	-3.25929	Medtr3g030860.1
c61340_g1_i1	-3.30212	Medtr7g061020.1
c63812_g1_i1	-3.31692	Medtr4g102280.1
c68699_g1_i1	-3.32683	Medtr8g020590.1
c67824_g1_i1	-3.37153	Medtr2g041260.1
c48498_g1_i1	-3.42315	Medtr4g035870.1
c44360_g1_i1	-3.42526	Medtr3g027280.1
c69423_g1_i3	-3.42939	Glyma.09G033900.1.p
c77007_g2_i1	-3.44595	Medtr3g074390.1
c55124_g1_i1	-3.48384	Medtr0445s0040.1
c57860_g1_i1	-3.5287	Medtr5g082290.1
c81401_g1_i2	-3.54904	Medtr7g070740.1
c77200_g1_i2	-3.55328	Medtr1g090973.1
c64867_g1_i1	-3.55535	Medtr7g498320.1
c77262_g1_i3	-3.65679	Medtr7g103000.1
c81539_g1_i2	-3.66609	Medtr3g110740.1
c60578_g1_i1	-3.68198	Medtr1g012020.1
c64823_g1_i1	-3.69885	Glyma.15G237700.1.p
c50227_g1_i1	-3.73804	Glyma.13G046400.1.p
c66739_g1_i2	-3.7435	Medtr2g104050.1
c72934_g1_i1	-3.75276	Medtr0125s0060.1
c64230_g1_i1	-3.78899	Medtr4g094285.1
c64975_g1_i1	-3.80704	Glyma.19G046500.1.p
c54537_g1_i1	-3.82323	Medtr1g090050.1
c78931_g1_i1	-3.87754	Medtr2g091200.1
c72362_g1_i1	-3.88105	Medtr7g113360.1
c82090_g1_i1	-3.89323	Medtr2g046550.1
c70071_g1_i1	-3.89833	Medtr2g100340.1
c65411_g1_i2	-3.92168	Medtr3g011650.1
c54770_g1_i2	-3.92458	Medtr5g059130.1
c68791_g2_i1	-3.93061	Glyma.10G154700.1.p
c36536_g1_i1	-3.93338	Medtr4g084060.1
c45646_g1_i1	-3.96371	Medtr8g018790.1
c66572_g2_i1	-3.97632	Medtr6g037380.1
c69125_g1_i1	-3.99502	Medtr3g115200.1
c67635_g1_i4	-4.01824	Medtr0428s0040.1
c72268_g2_i7	-4.03853	Medtr4g063975.1
c76299_g1_i3	-4.03998	Medtr0006s0160.1
c67069_g1_i1	-4.0458	Medtr6g037090.1
c58149_g1_i1	-4.08006	Medtr5g034580.1
c75975_g1_i2	-4.09123	Medtr7g085050.1
c51675_g1_i1	-4.09466	Medtr1g087760.1
c67041_g2_i1	-4.09974	Glyma.06G222100.1.p
c64815_g1_i1	-4.11287	Medtr2g041550.1
c64781_g1_i1	-4.1245	Medtr5g071780.1
c23619_g1_i1	-4.15723	Medtr1g090690.1
c74508_g3_i4	-4.16212	Medtr5g090300.1
c77434_g3_i1	-4.19827	Medtr1g008670.1
c72604_g1_i2	-4.25267	Medtr4g125710.1
c74661_g2_i1	-4.2798	Medtr7g067000.1
c55730_g1_i1	-4.29369	Medtr2g095220.3
c32971_g1_i1	-4.30316	AT4G23160.1
c70259_g2_i2	-4.31118	Medtr3g110028.2
c79667_g2_i6	-4.32971	Medtr5g075530.1
c73279_g1_i2	-4.35265	Medtr8g099695.1
c65111_g1_i1	-4.37632	Medtr1g069575.1
c43832_g1_i1	-4.38336	Medtr4g068920.1
c80487_g1_i1	-4.40464	Medtr5g072260.1
c41567_g1_i1	-4.42202	Medtr6g461770.1
c70649_g1_i1	-4.43716	Medtr6g005360.1
c37345_g1_i1	-4.46193	Medtr2g436080.1
c42859_g1_i2	-4.47672	Medtr4g093660.1
c72607_g1_i3	-4.62909	Medtr5g015830.1
c36572_g1_i1	-4.6382	Medtr2g082040.1
c68901_g1_i2	-4.66926	Medtr5g005710.1
c80112_g2_i1	-4.6837	Medtr7g086510.1
c54088_g1_i1	-4.69059	Medtr5g012600.1
c78268_g1_i1	-4.70193	Medtr7g015240.1
c41113_g1_i1	-4.70462	Medtr7g055850.1
c46959_g1_i1	-4.71628	Medtr3g091940.1
c72075_g1_i3	-4.73206	Medtr8g075440.1
c42405_g1_i1	-4.75252	Medtr7g066260.1
c55267_g1_i1	-4.75559	Medtr3g104560.2
c63849_g1_i1	-4.80511	Medtr8g461110.2
c76171_g2_i2	-4.80515	Medtr8g047190.1
c76414_g2_i1	-4.80687	Medtr2g021248.1
c46060_g1_i1	-4.8213	Medtr8g038990.1
c72437_g1_i1	-4.84812	Medtr6g034220.1
c76739_g1_i5	-4.85201	Medtr3g031860.1
c66855_g2_i2	-4.86232	Medtr6g075970.1
c77831_g1_i3	-4.86499	Medtr8g032590.2
c63107_g1_i1	-4.872	Medtr2g043410.1
c67675_g1_i1	-4.88941	Medtr1g064560.1
c69474_g1_i8	-4.89053	Medtr4g020535.1
c72691_g1_i1	-4.89548	Medtr7g113960.1
c74746_g1_i3	-4.90098	Medtr2g034580.1
c81879_g1_i1	-4.907	Medtr3g098650.1
c16342_g1_i1	-4.91028	Medtr1g112350.1
c56817_g1_i1	-4.92254	Medtr3g040760.1
c32842_g1_i1	-4.93997	Medtr4g095065.1
c63047_g1_i1	-4.99456	Medtr8g445780.1
c56883_g1_i1	-5.00011	Medtr2g040920.1
c64413_g1_i1	-5.01211	Medtr4g077590.1
c19091_g1_i1	-5.03323	Glyma.19G139400.1.p
c60232_g1_i2	-5.03382	Medtr7g021570.2
c63147_g1_i1	-5.03923	Medtr5g092510.1
c52467_g1_i1	-5.07937	Medtr7g113520.1
c50261_g1_i1	-5.09372	Medtr6g088670.1
c58724_g2_i1	-5.11455	Medtr4g059020.1
c73098_g2_i1	-5.11799	Medtr5g041255.1
c80531_g1_i4	-5.12338	Medtr2g074980.1
c27877_g1_i2	-5.16758	Medtr1g101540.1
c69028_g2_i1	-5.16996	Medtr6g015750.1
c36889_g1_i1	-5.18215	Medtr4g123730.1
c53373_g1_i1	-5.18954	Medtr8g007125.1
c29796_g1_i1	-5.20545	Medtr3g107970.1
c65656_g1_i1	-5.20911	AT5G12950.1
c58535_g1_i1	-5.22746	Medtr4g112025.1
c53263_g1_i1	-5.23025	Medtr2g087810.1
c56366_g1_i1	-5.27269	Medtr6g048300.1
c23875_g1_i1	-5.30965	Medtr0470s0020.1
c60406_g1_i2	-5.31099	Medtr8g036115.1
c80119_g2_i1	-5.31228	Medtr4g122920.1
c62085_g1_i1	-5.36685	Medtr4g057345.1
c75617_g1_i1	-5.36875	Medtr1g073130.1
c50991_g1_i1	-5.37391	Medtr6g021530.1
c43445_g1_i1	-5.37426	Medtr3g093790.1
c62763_g1_i1	-5.38988	Glyma.05G221500.1.p
c57580_g1_i2	-5.39179	Medtr3g008960.1
c76017_g1_i5	-5.43254	Medtr6g038980.1
c80179_g2_i3	-5.43414	Medtr5g055310.1
c16766_g1_i1	-5.43423	Medtr5g026790.1
c56225_g1_i1	-5.4351	Medtr8g022430.1
c44414_g1_i1	-5.45043	Medtr7g015280.1
c72763_g1_i1	-5.47523	Medtr7g080040.1
c59747_g1_i1	-5.4951	Medtr1g013190.1
c65818_g1_i1	-5.5129	Medtr7g015340.1
c65077_g1_i1	-5.51736	Medtr8g092675.1
c55259_g1_i1	-5.53408	Medtr1g035250.1
c48000_g1_i1	-5.55287	Medtr2g010050.1
c41924_g1_i1	-5.57027	Medtr2g021710.1
c78658_g2_i2	-5.57549	Medtr8g085570.3
c74332_g1_i2	-5.57631	Medtr6g011060.1
c59050_g1_i1	-5.57639	Medtr5g087320.1
c74364_g2_i3	-5.57789	Medtr1g070355.1
c30713_g1_i1	-5.605	Medtr3g005330.1
c55902_g1_i1	-5.64165	Medtr1g079465.1
c81055_g4_i1	-5.64307	Medtr5g070470.1
c56504_g1_i1	-5.64955	Medtr2g105390.1
c67064_g1_i1	-5.65175	Medtr2g046620.1
c24052_g1_i1	-5.694	Medtr2g086200.1
c78149_g1_i2	-5.6986	Medtr8g092510.1
c71602_g1_i1	-5.70431	Medtr2g093740.12
c79419_g1_i1	-5.71172	Medtr0168s0080.2
c48970_g1_i1	-5.73022	Medtr8g014580.2
c35197_g1_i1	-5.73127	Medtr7g081120.1
c69432_g1_i3	-5.73538	Medtr6g471100.1
c54982_g1_i1	-5.73997	Medtr6g027620.1
c81028_g1_i7	-5.7664	Medtr2g103990.4
c27240_g1_i1	-5.77298	Medtr5g082460.1
c77838_g2_i2	-5.77764	Medtr8g093580.1
c64004_g3_i1	-5.77849	Medtr8g018260.1
c52588_g1_i1	-5.80976	Glyma.16G031600.4.p
c20075_g1_i1	-5.81438	Medtr4g104610.1
c162_g1_i1	-5.8193	Medtr8g020430.1
c54469_g1_i1	-5.81987	Medtr1g086650.1
c75950_g1_i3	-5.83305	Medtr6g085070.1
c70142_g3_i1	-5.83745	Medtr3g452600.1
c49022_g1_i1	-5.84311	Medtr6g043510.1
c53453_g1_i1	-5.84447	AT4G23160.1
c55074_g1_i1	-5.84752	Medtr3g450390.1
c44313_g1_i1	-5.86332	Medtr5g038570.1
c42615_g1_i1	-5.86586	Medtr5g092250.1
c54660_g1_i1	-5.87025	Medtr5g091220.1
c68080_g2_i1	-5.87387	Medtr7g032380.1
c47013_g1_i1	-5.87788	Medtr8g085560.1
c34433_g1_i1	-5.9117	Medtr2g450060.1
c54100_g1_i1	-5.91903	Medtr1g032590.1
c35296_g1_i1	-5.93261	Medtr4g020630.1
c71464_g2_i1	-5.93788	Medtr4g071360.1
c49736_g1_i1	-5.93882	Medtr3g005770.1
c53421_g1_i1	-5.94381	Medtr8g078970.1
c39093_g1_i1	-5.94869	Medtr3g082420.2
c5056_g1_i1	-5.96892	Medtr5g022770.1
c60253_g1_i2	-5.97388	AT4G31360.1
c62480_g1_i1	-5.979	Medtr4g112035.1
c19041_g1_i1	-5.97976	Medtr4g134400.2
c14411_g1_i1	-5.99629	Medtr8g039080.1
c83295_g1_i1	-5.99655	Medtr4g104350.2
c47602_g1_i1	-6.00836	Medtr7g115430.1
c65606_g1_i2	-6.02468	Medtr5g070490.1
c59771_g2_i1	-6.03199	Medtr3g047140.1
c32556_g1_i1	-6.04292	Glyma.02G018900.1.p
c68037_g2_i1	-6.05493	Medtr4g055420.1
c65353_g2_i1	-6.05634	Medtr8g080910.1
c32422_g1_i1	-6.06334	Medtr7g111650.2
c82117_g1_i3	-6.06769	Medtr5g464720.1
c63885_g2_i1	-6.07094	Medtr2g097700.1
c53131_g1_i1	-6.07307	Medtr7g095430.2
c87643_g1_i1	-6.07605	Medtr5g046670.1
c62543_g2_i1	-6.07631	Medtr6g017300.1
c57555_g2_i1	-6.08435	Medtr4g077590.1
c48808_g1_i1	-6.087	Medtr3g019010.1
c80725_g1_i1	-6.08987	Medtr8g085210.1
c45918_g1_i1	-6.0904	Medtr7g091470.1
c49425_g1_i1	-6.09743	Medtr4g085810.1
c14926_g1_i1	-6.11235	Glyma.06G183500.1.p
c59797_g1_i1	-6.113	Medtr3g109030.1
c52253_g1_i1	-6.11947	Glyma.10G295000.1.p
c71816_g2_i2	-6.13334	Medtr1g060030.1
c73584_g2_i5	-6.13371	Medtr8g059295.1
c34969_g1_i1	-6.13653	Medtr4g094692.1
c48874_g1_i1	-6.14271	Medtr0032s0030.1
c52119_g1_i1	-6.1581	Glyma.17G174900.1.p
c43729_g1_i1	-6.16308	Medtr2g008210.1
c58944_g1_i1	-6.16784	Medtr6g072495.1
c41991_g1_i1	-6.19089	Medtr4g046713.1
c58891_g1_i2	-6.20211	Medtr8g106695.1
c37853_g1_i1	-6.23433	Medtr8g094810.1
c48375_g1_i1	-6.23483	Medtr7g111320.1
c54491_g1_i1	-6.24501	Glyma.02G181400.1.p
c56659_g1_i1	-6.24811	Medtr1g105785.1
c63203_g1_i1	-6.26528	Medtr6g022140.2
c73159_g1_i1	-6.27244	Medtr8g494240.3
c60054_g1_i1	-6.27734	Medtr8g039910.4
c54083_g1_i1	-6.28462	Glyma.03G077000.1.p
c57623_g2_i1	-6.29727	Medtr8g042470.1
c53663_g1_i1	-6.29787	Medtr4g066380.1
c36170_g1_i1	-6.31874	Medtr5g023040.1
c74003_g3_i2	-6.33641	Medtr6g009110.1
c80391_g1_i1	-6.33707	Medtr3g022300.1
c74332_g1_i6	-6.34318	Medtr6g011060.1
c51061_g1_i1	-6.37058	Medtr1g029680.1
c76410_g1_i3	-6.37692	Medtr5g054780.1
c37388_g1_i1	-6.38828	Medtr7g056640.1
c81221_g2_i7	-6.39102	Medtr4g022480.1
c50940_g1_i1	-6.39613	Medtr7g022220.1
c64262_g1_i1	-6.3972	Medtr1g084120.1
c8748_g1_i1	-6.40024	Medtr3g118010.1
c55182_g1_i1	-6.40116	Medtr7g056280.1
c64084_g1_i1	-6.41721	Medtr1g012180.1
c49466_g1_i1	-6.42167	Medtr3g065300.1
c50878_g1_i1	-6.42203	AT5G54500.1
c51064_g1_i1	-6.43456	Medtr4g097080.1
c88777_g1_i1	-6.43482	Medtr3g084790.1
c45466_g1_i1	-6.43738	Medtr4g057493.1
c49903_g1_i1	-6.43962	Medtr5g094700.1
c81594_g1_i8	-6.45051	Medtr7g084040.1
c70211_g1_i1	-6.45912	Medtr5g017790.1
c64000_g2_i1	-6.50446	Medtr3g062610.1
c29292_g1_i1	-6.52178	Medtr1g088720.1
c54195_g1_i3	-6.5346	Medtr3g097290.2
c80752_g1_i1	-6.53911	Medtr8g099550.1
c33433_g1_i1	-6.54746	Glyma.19G023400.1.p
c49518_g1_i1	-6.54746	Medtr1g094210.1
c43421_g1_i1	-6.55806	Medtr4g130400.1
c73114_g4_i1	-6.55815	Medtr4g124900.2
c50443_g1_i1	-6.55884	Medtr4g022290.1
c67739_g1_i4	-6.56805	Medtr7g087455.1
c51459_g1_i1	-6.56945	Medtr1g007020.1
c52387_g1_i1	-6.57591	Medtr3g111990.1
c46779_g1_i1	-6.59955	Medtr3g033620.1
c51894_g1_i1	-6.60576	Medtr8g071970.1
c44524_g1_i1	-6.62682	Medtr4g123110.1
c46769_g1_i1	-6.62929	Medtr5g005940.1
c50222_g1_i1	-6.64133	Medtr3g064250.1
c6968_g1_i1	-6.64177	Medtr3g104590.1
c67172_g1_i1	-6.64695	Medtr4g051880.1
c40901_g2_i1	-6.64871	Medtr2g023220.1
c67636_g1_i2	-6.65216	Medtr8g028500.1
c60543_g1_i1	-6.65499	Medtr0007s0380.1
c83271_g1_i1	-6.67139	Medtr8g022750.1
c47935_g1_i1	-6.67254	Medtr6g088715.1
c28379_g1_i1	-6.67342	Medtr6g044600.1
c45417_g1_i1	-6.68444	Medtr3g067940.1
c59611_g1_i1	-6.68581	Medtr2g072610.1
c23094_g1_i1	-6.7162	Medtr1g085980.1
c72543_g1_i1	-6.72586	Medtr3g049490.1
c67979_g1_i1	-6.7397	Medtr3g067940.1
c63695_g1_i1	-6.73996	Medtr8g016150.1
c63709_g1_i1	-6.74052	Medtr2g007880.1
c52639_g1_i1	-6.74749	Medtr5g042100.1
c41725_g1_i1	-6.7588	Medtr3g113140.1
c60587_g1_i1	-6.76191	Medtr2g091140.1
c75377_g2_i1	-6.76932	Medtr5g070700.1
c75736_g1_i3	-6.77676	Medtr5g046560.1
c45494_g1_i1	-6.77954	Medtr8g018890.1
c71911_g1_i1	-6.78641	Medtr6g037750.1
c36780_g1_i1	-6.80708	Medtr3g105470.1
c51360_g1_i1	-6.81359	Medtr1g086540.1
c58926_g1_i1	-6.82346	Medtr0116s0090.1
c22721_g1_i1	-6.82437	Medtr8g087530.1
c31411_g1_i1	-6.82501	Medtr4g057345.1
c77134_g1_i5	-6.83705	Medtr1g075200.1
c56221_g2_i1	-6.84934	Medtr3g101410.1
c28738_g1_i1	-6.85294	Medtr3g466110.1
c77673_g1_i1	-6.85348	Medtr2g006020.1
c3126_g1_i1	-6.8562	Medtr5g012600.1
c67801_g3_i1	-6.86509	Medtr8g068120.1
c24197_g1_i1	-6.87294	Glyma.16G030600.1.p
c25680_g1_i1	-6.88653	Medtr3g117060.1
c62187_g1_i1	-6.89282	Medtr3g072400.1
c78157_g1_i1	-6.8938	Medtr3g075540.1
c7847_g1_i1	-6.89454	Medtr4g076600.1
c73117_g1_i1	-6.90665	Medtr0019s0170.1
c55822_g1_i1	-6.90765	Medtr0530s0020.1
c48988_g1_i1	-6.91483	Medtr6g045607.1
c71824_g1_i1	-6.91824	Medtr8g102190.3
c68505_g1_i1	-6.92239	Medtr7g106780.1
c77691_g4_i1	-6.92503	Medtr7g109130.1
c80269_g2_i1	-6.92819	Glyma.02G258200.1.p
c16734_g1_i1	-6.93455	Medtr7g013810.1
c80900_g2_i1	-6.9594	Glyma.07G077700.2.p
c50315_g1_i1	-6.96079	Medtr8g022240.1
c77243_g2_i1	-6.96122	Medtr3g082700.1
c78932_g1_i3	-6.97087	Medtr2g079650.1
c74254_g1_i1	-7.01542	Medtr4g130270.1
c64548_g1_i1	-7.02065	Medtr3g084800.1
c33772_g1_i1	-7.03404	Medtr1g034440.1
c55774_g2_i1	-7.03532	Medtr5g074860.2
c8337_g1_i1	-7.03613	Medtr1g059090.2
c68785_g1_i1	-7.03974	Medtr5g086945.1
c77660_g1_i2	-7.05661	Medtr8g035880.1
c52202_g1_i1	-7.07646	Medtr8g011600.1
c86727_g1_i1	-7.14173	Medtr1g107580.1
c59684_g1_i1	-7.15108	Glyma.01G184700.1.p
c68374_g1_i1	-7.15591	Medtr1g035090.1
c68824_g1_i1	-7.20028	Medtr5g030920.2
c79622_g1_i1	-7.20275	Medtr2g079550.1
c66242_g1_i1	-7.20342	Medtr1g064240.1
c24693_g1_i1	-7.22841	Glyma.10G045500.4.p
c87409_g1_i1	-7.22841	Medtr1g028280.2
c55154_g1_i1	-7.24388	Medtr5g430750.1
c69869_g1_i4	-7.24415	Medtr8g070020.1
c40407_g1_i1	-7.25436	Medtr7g084880.1
c67793_g2_i1	-7.25556	Medtr7g078180.1
c56577_g1_i3	-7.28289	Medtr3g498785.2
c63854_g1_i1	-7.28429	Glyma.08G330300.5.p
c51582_g1_i1	-7.31482	Medtr4g122070.1
c441_g1_i1	-7.31628	Medtr8g016170.1
c66221_g1_i2	-7.3417	Medtr4g076180.1
c28376_g1_i1	-7.3479	Medtr1g048630.1
c48424_g1_i1	-7.3494	Medtr8g006260.1
c56109_g1_i1	-7.34985	Medtr4g011660.1
c72224_g1_i1	-7.43913	Glyma.08G003200.2.p
c57533_g1_i1	-7.47396	Medtr5g036520.1
c75152_g1_i2	-7.49086	Medtr5g079680.2
c61732_g1_i1	-7.52217	Medtr6g077830.1
c73465_g2_i3	-7.53588	Medtr0232s0030.1
c18747_g1_i1	-7.54093	Medtr2g031560.1
c50426_g1_i1	-7.5413	Medtr7g050445.1
c22217_g1_i1	-7.54772	Medtr2g094860.1
c60608_g1_i1	-7.54821	Medtr6g043460.1
c34407_g1_i1	-7.55671	Medtr2g034810.2
c3302_g1_i1	-7.56608	Glyma.11G062900.1.p
c63363_g1_i1	-7.61176	Medtr4g029720.1
c61387_g1_i1	-7.66652	Medtr8g086320.1
c25965_g1_i1	-7.67181	Medtr7g094190.1
c43464_g1_i1	-7.68419	Medtr1g106200.1
c70259_g1_i1	-7.68614	Medtr3g110028.2
c81981_g3_i1	-7.70098	Medtr2g078050.1
c81257_g1_i1	-7.71426	Medtr2g033080.1
c31191_g1_i1	-7.72185	Medtr4g107840.1
c23051_g1_i1	-7.72897	Medtr7g111460.1
c46272_g1_i1	-7.73111	Medtr4g074330.1
c66189_g1_i2	-7.73329	Medtr5g076840.1
c57007_g1_i1	-7.74515	Medtr6g073540.1
c80029_g3_i1	-7.76087	Medtr0043s0080.2
c63597_g1_i1	-7.77369	Medtr3g030080.1
c63885_g1_i1	-7.81127	Medtr2g097700.1
c59505_g1_i1	-7.82181	Medtr5g044980.1
c40577_g1_i1	-7.8279	Medtr6g032880.1
c5345_g1_i1	-7.8355	Medtr3g088415.2
c1888_g1_i1	-7.84001	Medtr1g090320.2
c39811_g1_i1	-7.85825	Medtr4g109580.2
c71840_g1_i3	-7.88594	Medtr1g109320.1
c74154_g1_i1	-7.89441	Medtr1g009650.1
c31200_g1_i1	-7.89774	Medtr8g079690.1
c62831_g1_i2	-7.90678	Medtr8g069880.1
c53422_g1_i2	-7.91817	Medtr7g114100.1
c42816_g1_i1	-7.93594	Glyma.10G098100.1.p
c66189_g2_i1	-7.96448	Medtr7g078640.1
c80372_g1_i2	-7.98803	Medtr4g116770.1
c48756_g1_i1	-7.99224	Medtr2g038760.1
c66036_g1_i1	-8.00943	Medtr4g105770.1
c604_g1_i1	-8.02228	Medtr8g446950.1
c52820_g1_i1	-8.02978	Medtr2g068910.1
c55839_g1_i1	-8.05203	Medtr8g092060.2
c43588_g1_i1	-8.05375	Medtr1g105655.1
c68723_g2_i2	-8.07342	Medtr4g094742.1
c70935_g1_i1	-8.08782	Medtr2g040350.2
c42835_g1_i1	-8.0934	Medtr4g106410.1
c47919_g1_i1	-8.10577	Medtr2g090260.1
c72251_g2_i1	-8.10655	Medtr7g113510.2
c48324_g1_i1	-8.11918	Medtr2g060420.4
[truncated: 288 more rows]

## Sheet: DEGs in 7day
DEGs in 7 day treatment
Gene ID	log2 fold change(7day)	Gene definition
c74086_g1_i6	9.63705	Medtr6g084640.1
c79577_g1_i1	9.19645	Medtr1g100627.1
c79577_g2_i1	9.07858	Medtr1g100623.2
c60125_g1_i1	8.75979	Medtr5g062320.1
c60391_g1_i1	8.69782	Medtr3g034640.1
c74086_g1_i5	8.66312	Medtr6g084640.1
c73864_g1_i2	8.46681	AT1G26970.1
c74086_g1_i1	8.4092	Medtr6g084640.1
c37217_g1_i1	8.39621	Medtr2g040740.1
c29423_g1_i1	8.08112	Medtr3g436100.1
c79746_g1_i1	8.07612	Medtr4g020110.1
c76519_g2_i1	8.04222	Medtr7g065720.1
c27049_g1_i1	7.9781	Medtr3g436100.1
c55130_g1_i1	7.8126	Medtr2g084160.1
c68160_g1_i1	7.79345	Medtr8g096020.1
c62675_g1_i1	7.74786	Medtr5g020060.1
c76854_g4_i1	7.69958	Medtr6g061850.1
c74982_g1_i2	7.68396	Medtr6g033535.1
c41513_g1_i1	7.65815	Medtr8g028760.1
c79530_g2_i1	7.59132	Medtr4g129020.1
c57473_g1_i1	7.49311	Medtr2g094060.3
c49529_g1_i1	7.47964	Medtr7g101385.1
c52284_g1_i1	7.47696	Medtr4g099370.1
c38087_g1_i1	7.46341	Medtr8g012620.1
c71058_g2_i1	7.44195	Medtr8g083290.1
c41707_g1_i1	7.42325	Medtr3g113140.1
c76545_g2_i1	7.40346	Medtr6g045607.1
c50826_g1_i1	7.38208	Medtr3g108040.1
c78133_g2_i1	7.37096	Medtr4g094548.1
c56037_g1_i1	7.35298	Medtr1g074090.1
c79379_g4_i1	7.34426	Medtr2g079990.2
c71822_g1_i4	7.33611	Medtr1457s0010.1
c80640_g2_i1	7.33461	Medtr7g090180.1
c61440_g1_i1	7.30971	Medtr4g102460.1
c72165_g1_i2	7.28849	Medtr8g070040.1
c68952_g1_i1	7.28646	Medtr4g011230.1
c77194_g2_i1	7.27109	Glyma.16G063700.1.p
c80665_g3_i2	7.22622	Medtr2g037140.1
c58486_g1_i1	7.22603	Medtr5g046030.1
c38569_g1_i1	7.18643	Medtr8g096910.1
c61089_g1_i1	7.13831	Medtr8g093620.1
c84851_g1_i1	7.1278	Medtr7g104300.1
c52725_g2_i1	7.10864	Medtr5g095840.1
c22378_g1_i1	7.0995	Medtr7g077160.1
c51785_g1_i3	7.08075	Medtr0116s0010.1
c30741_g1_i1	7.07362	Medtr3g098310.2
c70214_g1_i1	7.07058	Medtr4g130540.1
c64791_g1_i1	7.03179	Medtr4g099370.1
c43334_g1_i1	7.01486	Medtr3g034640.1
c55333_g1_i1	7.01265	Medtr1g063080.1
c68976_g2_i1	6.98748	Medtr5g055690.1
c68898_g1_i1	6.98028	Medtr8g447310.1
c68952_g2_i1	6.97968	Medtr4g011230.1
c81528_g2_i1	6.96403	Medtr3g467360.1
c35010_g1_i1	6.96179	Medtr3g092550.1
c69062_g1_i1	6.95398	Medtr7g060260.1
c81026_g1_i2	6.95368	Medtr4g021470.1
c73273_g1_i4	6.9193	Medtr7g062300.1
c36618_g1_i1	6.91528	Medtr3g101260.1
c66140_g3_i1	6.90726	Medtr8g090095.1
c36462_g1_i1	6.9067	Medtr7g081010.1
c9883_g1_i1	6.8749	Medtr8g077430.4
c51294_g1_i1	6.8626	Medtr1g090867.1
c73905_g2_i1	6.85621	Medtr8g020870.1
c63117_g1_i1	6.85381	Medtr1g040735.1
c78260_g1_i1	6.83893	Medtr7g100370.1
c77832_g3_i1	6.83625	Medtr7g075610.1
c47559_g2_i1	6.83568	Medtr7g116960.1
c73877_g1_i1	6.83009	Medtr5g064060.1
c25441_g1_i1	6.82627	Medtr2g437930.1
c57395_g1_i1	6.82028	Medtr3g087280.1
c74753_g1_i3	6.81105	Medtr2g084200.1
c70043_g1_i2	6.79279	Medtr2g035130.1
c66689_g1_i1	6.76251	Medtr4g100650.1
c37674_g1_i1	6.74033	Medtr2g078780.1
c35719_g1_i1	6.73314	Glyma.18G158100.2.p
c77786_g1_i2	6.73117	Medtr6g091630.3
c36965_g1_i1	6.71563	Medtr6g463630.1
c87892_g1_i1	6.71264	Medtr0212s0040.1
c75247_g1_i1	6.70679	Medtr7g010800.1
c71818_g1_i1	6.70642	Medtr1g078190.1
c81489_g1_i3	6.70378	Medtr2g040830.1
c60191_g1_i1	6.69638	Medtr4g050330.1
c12045_g1_i1	6.68616	Medtr3g081500.1
c54878_g1_i1	6.68069	Medtr3g062570.2
c79270_g2_i1	6.63107	Medtr0032s0060.1
c81511_g1_i1	6.62854	Medtr7g060170.1
c81686_g2_i1	6.627	Glyma.20G238400.2.p
c48298_g1_i1	6.62438	Medtr8g041190.1
c74753_g1_i4	6.61312	Medtr2g084215.1
c55360_g2_i2	6.59917	Medtr7g015340.1
c77236_g1_i1	6.59549	Glyma.13G270100.1.p
c56152_g1_i2	6.5936	Medtr2g094130.2
c17640_g1_i1	6.58695	Medtr7g110810.1
c44510_g1_i1	6.5819	Medtr2g083920.2
c61436_g1_i1	6.56451	Medtr7g104870.1
c81727_g2_i1	6.55928	Medtr8g469270.2
c76507_g3_i1	6.55076	Medtr4g013315.1
c40361_g1_i1	6.54778	Medtr5g008450.1
c82074_g1_i1	6.54255	Medtr0025s0060.1
c49319_g1_i1	6.53914	Medtr4g022610.1
c74086_g1_i3	6.51501	Medtr6g084640.1
c60750_g1_i1	6.50964	Medtr3g461480.1
c61876_g1_i2	6.50836	Medtr3g058740.4
c58695_g1_i1	6.48834	Medtr3g116240.1
c61262_g1_i2	6.46442	Medtr4g009410.1
c50046_g1_i1	6.4425	Medtr1g062090.1
c44642_g1_i1	6.38942	Medtr2g070130.1
c62456_g1_i1	6.38771	Medtr7g058920.1
c48497_g1_i2	6.37895	Medtr1g084660.2
c33338_g1_i1	6.37462	Medtr4g068360.1
c23178_g1_i1	6.37089	Glyma.02G253200.1.p
c39581_g1_i1	6.36802	Medtr5g020530.1
c56957_g1_i1	6.35407	Medtr4g485550.1
c67683_g1_i1	6.33147	Medtr8g077150.2
c70144_g1_i1	6.32877	Medtr6g011310.2
c25113_g1_i1	6.30855	Medtr3g116480.1
c53353_g2_i1	6.29679	Glyma.12G040700.1.p
c71822_g2_i1	6.28427	Medtr1457s0010.1
c60750_g2_i1	6.28204	Medtr5g096850.1
c47216_g1_i1	6.27528	Medtr3g464580.3
c57735_g1_i1	6.27464	Medtr8g008640.1
c79762_g1_i1	6.27378	Medtr8g087770.1
c81468_g1_i2	6.23818	Medtr8g069505.1
c81669_g3_i1	6.22861	Medtr3g463760.1
c33500_g1_i1	6.20009	Medtr5g073020.1
c64010_g1_i1	6.19853	Medtr6g006775.1
c23392_g1_i1	6.18437	Glyma.13G139400.1.p
c39005_g1_i1	6.17799	Medtr3g110108.1
c45174_g1_i1	6.17471	Glyma.18G266300.1.p
c40036_g1_i1	6.16719	Medtr5g088770.1
c66049_g1_i2	6.15962	Medtr8g069785.1
c68965_g1_i1	6.14996	Medtr2g070860.1
c47529_g1_i1	6.14557	Medtr1g019750.1
c59644_g1_i1	6.14293	Medtr1g052110.1
c61078_g1_i1	6.13292	Glyma.13G182100.2.p
c60642_g1_i2	6.11621	Medtr5g094430.4
c44475_g1_i1	6.11039	Medtr7g094520.1
c70195_g1_i1	6.11029	Medtr1g018650.1
c80724_g2_i2	6.10262	Medtr2g079030.1
c48555_g1_i1	6.0992	Medtr4g094705.1
c35179_g1_i1	6.09848	Medtr1g013650.1
c57315_g1_i1	6.09777	Medtr3g102040.1
c36764_g1_i1	6.09615	Medtr4g081570.1
c42583_g1_i1	6.09184	Glyma.16G036100.1.p
c43624_g1_i1	6.09146	Medtr1g103570.1
c57378_g1_i2	6.0818	Medtr7g078700.1
c43997_g1_i2	6.07605	Medtr1g021638.1
c74040_g1_i1	6.06939	Medtr5g025690.1
c74753_g1_i2	6.0666	Medtr2g084215.1
c47625_g1_i1	6.05227	Medtr4g109980.1
c66737_g2_i1	6.04618	Medtr2g104050.1
c81993_g2_i1	6.03759	Medtr8g028265.1
c80602_g1_i4	6.03263	Medtr3g005670.2
c20494_g1_i1	6.02539	Medtr8g042000.2
c43098_g1_i1	6.02293	Medtr5g026400.8
c63883_g1_i1	6.02268	Medtr4g006650.1
c74753_g1_i1	6.01714	Medtr2g084215.1
c37928_g1_i1	6.00752	Medtr4g097120.1
c68036_g3_i1	5.99302	Medtr5g083520.1
c72150_g1_i3	5.99175	Medtr8g018747.1
c75971_g2_i2	5.97707	Medtr7g066290.1
c61138_g1_i1	5.96663	Medtr6g072515.1
c57612_g1_i1	5.95555	Medtr4g063940.2
c63265_g1_i1	5.95254	Medtr3g083230.1
c68362_g1_i1	5.94971	Medtr7g010800.1
c50977_g1_i1	5.94437	Medtr5g009970.5
c54364_g1_i1	5.94225	Medtr4g070810.1
c81844_g1_i4	5.90596	Medtr2g037690.1
c43347_g1_i1	5.90331	Medtr2g031390.1
c88440_g1_i1	5.89783	Medtr5g071410.1
c56970_g1_i1	5.89687	Medtr2g032060.1
c49239_g1_i1	5.89594	Medtr5g061690.2
c71631_g1_i3	5.88691	Medtr8g447020.1
c68929_g1_i1	5.87929	Medtr1g014110.1
c69915_g1_i1	5.87111	Medtr7g072510.1
c35899_g1_i1	5.8666	Medtr4g036880.1
c56184_g1_i1	5.85905	Medtr2g013370.1
c23842_g1_i1	5.84701	Medtr3g087390.1
c58444_g2_i1	5.84588	Medtr5g025610.3
c76323_g1_i1	5.8282	Medtr6g089960.1
c75005_g1_i1	5.8252	Medtr5g015460.1
c63968_g1_i1	5.81972	Medtr8g012550.1
c34779_g1_i1	5.81671	Medtr7g406860.2
c51770_g1_i1	5.81553	Glyma.17G251000.3.p
c59163_g1_i1	5.81377	Medtr7g117220.2
c65538_g1_i2	5.80782	Medtr6g088525.1
c62274_g1_i1	5.80771	Medtr5g005330.1
c46531_g1_i1	5.78775	Medtr3g026150.1
c59239_g1_i1	5.78375	Medtr7g058860.1
c20439_g1_i1	5.78355	Medtr3g076540.1
c16657_g1_i1	5.77766	Medtr4g069970.1
c71194_g1_i4	5.77699	Medtr3g083130.1
c56533_g1_i1	5.77369	Medtr3g092090.2
c58876_g1_i1	5.77087	Medtr6g044600.1
c74325_g1_i1	5.76361	Medtr1g046350.1
c64340_g1_i2	5.76224	Medtr1g030220.1
c57754_g1_i1	5.75881	Medtr7g063650.1
c66808_g1_i1	5.75671	Medtr3g092460.1
c43205_g1_i1	5.7524	Medtr2g088190.1
c69772_g2_i1	5.73671	Medtr1g086520.1
c62594_g1_i1	5.73042	Medtr8g016975.1
c47575_g1_i1	5.71172	Medtr2g013010.1
c58458_g1_i1	5.70887	Medtr8g085640.1
c35110_g1_i1	5.70139	Medtr8g107440.1
c61171_g1_i1	5.70013	Medtr5g091720.4
c67880_g1_i1	5.67915	Medtr2g103795.1
c33877_g1_i1	5.67567	Glyma.18G295500.1.p
c66984_g1_i2	5.66733	Medtr8g031080.1
c58375_g1_i1	5.66362	Medtr8g012725.1
c79541_g2_i1	5.65904	Medtr8g013600.1
c49309_g1_i1	5.65488	Medtr1g071720.1
c57741_g1_i1	5.64644	Medtr0009s0100.1
c50010_g1_i1	5.64466	Medtr3g035620.1
c70963_g1_i2	5.63963	Medtr6g007753.1
c59281_g1_i1	5.63928	AT2G31200.1
c57614_g1_i3	5.63176	Medtr7g012000.1
c34577_g1_i1	5.61017	Glyma.08G180400.1.p
c82061_g2_i1	5.60085	Medtr4g033390.1
c68165_g1_i1	5.59506	Medtr4g109680.1
c67053_g1_i1	5.5806	Medtr2g083810.1
c20983_g1_i1	5.5721	Glyma.11G101600.1.p
c70678_g1_i2	5.56506	Medtr4g057345.1
c70588_g2_i1	5.56262	Medtr8g080770.2
c60645_g2_i1	5.55873	Medtr8g043660.1
c39138_g1_i1	5.55354	Medtr3g084140.1
c67017_g1_i1	5.55275	Medtr1g042670.1
c70258_g4_i1	5.54602	Medtr2g104170.1
c61891_g1_i1	5.54454	Medtr3g452970.1
c44972_g1_i1	5.54204	Medtr6g033000.1
c55058_g1_i1	5.53898	Medtr2g082570.3
c80171_g1_i2	5.53156	Medtr4g061070.1
c76696_g1_i1	5.53123	Medtr1g102830.1
c47874_g1_i1	5.52805	Medtr0057s0100.1
c61188_g1_i1	5.52446	Medtr2g072160.1
c77316_g2_i1	5.51093	Medtr7g065230.1
c50833_g1_i1	5.49209	Medtr0153s0070.1
c37141_g1_i1	5.47685	Medtr2g009070.1
c54450_g1_i1	5.47287	Medtr7g025650.1
c65311_g1_i2	5.45095	Medtr5g022690.1
c34923_g1_i1	5.44158	Medtr8g013040.1
c60988_g1_i1	5.44155	Medtr3g111095.1
c47408_g1_i1	5.4276	Medtr8g098615.1
c39943_g1_i1	5.42194	Medtr3g046300.1
c24417_g1_i1	5.41678	Medtr5g082660.1
c78932_g2_i1	5.41585	Medtr2g079630.1
c46194_g1_i2	5.41248	Medtr3g081640.1
c68348_g1_i4	5.41135	Medtr7g013820.1
c55342_g1_i1	5.40132	Medtr1g101950.1
c78406_g1_i5	5.39704	Medtr2g032710.2
c53684_g1_i1	5.38862	Medtr8g098770.1
c47567_g1_i1	5.37709	Medtr7g069710.1
c57868_g1_i1	5.37065	Medtr5g039730.1
c33064_g1_i1	5.36782	Medtr2g041610.1
c51239_g1_i1	5.3657	Medtr1g083400.1
c53671_g1_i1	5.36014	Medtr2g030160.1
c7504_g1_i1	5.35706	Medtr3g116590.2
c74031_g1_i1	5.35701	Medtr8g024240.2
c71009_g1_i1	5.34651	Medtr5g078040.1
c58435_g1_i1	5.34639	Medtr4g094548.1
c48518_g1_i1	5.33743	Medtr4g107580.1
c29200_g1_i1	5.32851	Medtr2g013640.1
c35819_g1_i1	5.3276	Medtr3g094670.1
c75900_g3_i4	5.32457	Medtr1g062200.2
c81639_g1_i1	5.3233	Medtr3g101960.1
c25953_g1_i2	5.32149	Medtr2g044580.3
c34665_g1_i1	5.32064	Medtr8g039910.4
c49309_g2_i1	5.30757	Medtr1g071720.2
c68002_g1_i1	5.30707	Medtr2g009750.2
c61941_g1_i1	5.30376	Glyma.09G257000.1.p
c58877_g1_i1	5.30285	Medtr5g018060.1
c69319_g1_i1	5.30117	Glyma.08G109400.1.p
c27244_g1_i1	5.29157	Medtr5g020630.1
c47643_g1_i1	5.28704	Medtr5g096680.1
c57550_g1_i1	5.28328	Medtr1g030410.1
c67902_g1_i1	5.27483	Medtr4g103840.1
c55375_g1_i1	5.27233	Medtr4g107670.1
c74359_g1_i6	5.25827	Medtr3g028490.1
c40102_g1_i1	5.2508	Medtr1g110190.1
c81806_g1_i2	5.24011	Medtr4g010130.1
c73464_g1_i1	5.23958	Medtr0118s0070.1
c60805_g1_i1	5.22752	Medtr7g093140.1
c68975_g1_i1	5.22238	Medtr5g091100.1
c62696_g1_i1	5.22058	Medtr7g010820.1
c57773_g1_i1	5.22022	Medtr4g012430.1
c61303_g1_i1	5.21927	Medtr4g064200.1
c72022_g1_i3	5.21795	Medtr2g036490.1
c35317_g1_i1	5.2136	Medtr6g087920.1
c79945_g1_i3	5.20919	Medtr4g093260.3
c77767_g1_i4	5.20747	Medtr2g097530.1
c43012_g1_i1	5.20098	Glyma.07G077700.2.p
c61625_g1_i1	5.19771	Medtr5g016220.1
c63881_g1_i1	5.1803	Medtr1g088920.1
c79330_g1_i1	5.17696	Medtr1g054205.1
c47368_g1_i1	5.17649	Medtr2g072530.1
c31272_g1_i1	5.17584	Medtr5g019050.1
c77749_g2_i1	5.17198	Medtr7g066210.1
c53735_g1_i1	5.15975	Medtr0136s0010.1
c67803_g2_i2	5.15417	Medtr2g019000.1
c70181_g1_i1	5.14943	Medtr1g077420.2
c56544_g1_i1	5.14804	Medtr4g095430.1
c80426_g1_i1	5.14323	Medtr2g461180.1
c51781_g1_i1	5.1422	Medtr6g043640.1
c58087_g1_i1	5.13391	Medtr3g085660.7
c59542_g1_i1	5.13208	Medtr1g021590.1
c68227_g1_i1	5.13156	Medtr3g067715.1
c55925_g1_i1	5.1276	Medtr2g101090.1
c57439_g1_i1	5.11622	Medtr6g016655.1
c78946_g4_i2	5.11523	Medtr5g086030.1
c72383_g1_i1	5.11304	Medtr5g010590.1
c80713_g1_i2	5.10806	Medtr7g077740.1
c73939_g2_i1	5.09108	Medtr3g117530.3
c53886_g1_i1	5.09102	Medtr5g015830.1
c69091_g1_i1	5.08511	Medtr7g105070.1
c62185_g1_i1	5.07643	Glyma.07G196600.1.p
c76645_g2_i1	5.07487	Glyma.14G188500.1.p
c85285_g1_i1	5.07027	Medtr3g009400.1
c63894_g1_i1	5.0702	Medtr8g102660.1
c64197_g1_i1	5.06887	Medtr4g051575.1
c73848_g1_i4	5.06546	Medtr4g127510.1
c68756_g1_i1	5.06343	Medtr5g012220.1
c69511_g1_i1	5.05725	Medtr5g025310.1
c63346_g1_i1	5.05458	Medtr0082s0050.1
c49264_g1_i1	5.05282	Medtr3g088705.1
c61685_g1_i1	5.0496	Medtr5g029070.2
c43418_g1_i1	5.04631	Medtr6g075400.1
c53848_g1_i1	5.04026	Medtr4g111985.3
c65272_g1_i1	5.03583	Medtr4g011570.1
c56054_g1_i1	5.03263	Medtr4g094268.1
c51193_g1_i1	5.0278	Medtr5g004690.1
c64653_g1_i1	5.02247	Medtr4g017310.1
c75373_g1_i2	5.02023	Medtr8g094150.1
c74290_g1_i1	5.00831	Medtr3g088845.1
c73377_g1_i2	5.00298	Medtr3g048603.1
c52195_g1_i1	5.00096	Medtr2g086870.1
c81157_g2_i1	5.00095	Medtr1g013640.1
c74886_g1_i1	4.9965	Medtr2g100100.1
c77509_g1_i1	4.99474	Medtr4g048000.1
c23131_g1_i1	4.98623	Glyma.16G059800.1.p
c70963_g2_i2	4.98236	Medtr6g007747.1
c61247_g1_i2	4.97077	Medtr1g104490.1
c44968_g1_i1	4.96443	Medtr7g090420.1
c75350_g2_i5	4.963	Medtr1g027840.1
c60099_g1_i1	4.96181	Medtr6g086805.1
c39708_g1_i1	4.96035	Medtr2g056070.1
c71553_g1_i1	4.95602	Medtr4g085070.1
c78174_g1_i4	4.9354	Medtr7g063260.1
c52734_g1_i1	4.93368	Medtr3g011280.2
c62029_g1_i1	4.92373	Medtr1g031520.1
c77391_g5_i1	4.91734	Medtr3g024150.2
c79473_g2_i1	4.91577	Medtr8g101230.3
c40033_g1_i1	4.90732	Medtr2g069560.2
c75516_g1_i4	4.89859	Medtr5g071310.1
c80401_g1_i2	4.87915	Medtr3g051280.4
c53583_g1_i1	4.87253	Medtr3g092500.1
c75241_g1_i1	4.86904	Medtr4g095050.1
c49775_g1_i1	4.86323	Glyma.15G144500.1.p
c69586_g1_i2	4.85547	Medtr1g032160.1
c62178_g1_i1	4.85096	Medtr4g006970.1
c61623_g1_i1	4.85053	Medtr8g104340.3
c56663_g1_i1	4.84985	Medtr5g088610.1
c69445_g1_i1	4.84805	Medtr3g015420.1
c56100_g1_i1	4.84433	Medtr1g084820.1
c72675_g2_i1	4.84119	Medtr2g096870.1
c70778_g1_i1	4.83293	Medtr5g055680.1
c89373_g1_i1	4.83237	Medtr4g006070.1
c76854_g2_i1	4.83132	Medtr6g061940.1
c51283_g1_i1	4.82168	Medtr7g105630.1
c62110_g1_i1	4.82107	Glyma.19G164300.1.p
c80050_g1_i1	4.81246	Medtr1g074950.1
c58623_g1_i1	4.81166	Medtr5g006940.1
c71485_g1_i1	4.8116	Medtr4g019450.1
c63457_g1_i1	4.80735	Medtr2g012650.2
c73633_g2_i1	4.80554	Medtr5g045370.1
c66380_g1_i1	4.8033	Medtr2g097900.3
c68586_g2_i1	4.78208	Medtr3g086630.1
c63987_g1_i1	4.78015	Medtr3g058540.1
c71937_g1_i1	4.78014	Medtr5g091680.2
c47583_g1_i1	4.77832	Medtr4g074190.3
c72625_g1_i1	4.77321	Glyma.08G077300.1.p
c61146_g1_i1	4.76891	Medtr3g056675.1
c53312_g1_i1	4.76747	Medtr6g077680.1
c74412_g1_i1	4.7671	Medtr0042s0030.1
c74430_g2_i1	4.76003	Medtr6g045403.1
c61307_g1_i1	4.75917	Medtr2g089440.2
c59675_g1_i1	4.75841	Medtr8g064870.1
c61770_g1_i1	4.752	Medtr4g007540.2
c73865_g1_i1	4.74177	Medtr7g106200.2
c63802_g1_i1	4.7326	Medtr7g110880.1
c73234_g1_i1	4.7294	Medtr1g074410.1
c62728_g1_i1	4.72883	Medtr7g067530.1
c58352_g1_i1	4.72808	Medtr1g014700.1
c37111_g1_i1	4.72761	Medtr2g080080.1
c77468_g3_i1	4.72729	Medtr2g014470.1
c69541_g1_i1	4.7271	Glyma.05G137500.1.p
c64963_g1_i1	4.72652	Medtr1g039270.1
c65846_g2_i1	4.72224	Medtr7g069480.2
c66086_g1_i1	4.72224	Medtr1g090150.1
c57341_g1_i1	4.71701	Medtr2g022710.6
c63204_g1_i1	4.70598	Medtr0945s0020.1
c77940_g2_i1	4.70563	Medtr1g032220.1
c66332_g1_i1	4.69894	Medtr4g063975.1
c55239_g1_i1	4.69762	Medtr4g093830.1
c68235_g1_i1	4.69115	Medtr4g083590.1
c66084_g1_i1	4.68635	Medtr2g094470.2
c74662_g1_i1	4.68534	Medtr8g079450.1
c58216_g1_i1	4.68211	Medtr3g098980.1
c54921_g1_i1	4.67762	Medtr3g088675.1
c70138_g1_i1	4.67595	Medtr2g038410.1
c67214_g1_i1	4.67219	Medtr4g037495.1
c51573_g1_i1	4.6695	Medtr3g092400.1
c59061_g1_i1	4.66896	Medtr1g094085.3
c42922_g1_i1	4.66882	Medtr1g081830.1
c48746_g1_i1	4.66756	Medtr2g028880.1
c76078_g2_i2	4.66178	Medtr2g049020.1
c58392_g1_i1	4.65403	Medtr3g466740.1
c13237_g1_i1	4.65105	Medtr7g051210.1
c59149_g1_i1	4.64853	Medtr3g098600.1
c61554_g1_i2	4.63692	Medtr5g021810.2
c67222_g1_i1	4.62449	Medtr6g044830.1
c72477_g1_i1	4.61604	Medtr8g028265.1
c71953_g1_i1	4.61595	Medtr4g089060.1
c60585_g1_i1	4.6144	Medtr2g082590.1
c43763_g1_i1	4.60701	Medtr5g070310.1
c71300_g1_i1	4.59789	Medtr2g014470.1
c61436_g2_i1	4.59538	Medtr7g104870.1
c40561_g1_i1	4.59443	Medtr2g083810.1
c71822_g1_i3	4.59257	Medtr0002s0040.1
c70142_g1_i2	4.59013	Medtr1g079370.1
c62919_g1_i1	4.58348	Glyma.05G137500.1.p
c68072_g1_i1	4.58127	Medtr3g467100.1
c69181_g2_i1	4.57456	Medtr7g068290.1
c80132_g2_i3	4.57347	Glyma.10G212900.1.p
c71124_g1_i1	4.57214	Medtr4g045997.1
c53601_g1_i1	4.57148	Medtr1g050570.1
c60084_g1_i1	4.56893	Medtr5g042560.2
c53254_g1_i1	4.56439	Medtr0542s0020.1
c80962_g1_i1	4.56423	Medtr6g016260.1
c62627_g1_i1	4.56146	Medtr5g041350.1
c81354_g1_i1	4.55399	Medtr5g056160.1
c70985_g1_i1	4.55378	Medtr4g113270.2
c58973_g1_i1	4.5535	Medtr3g466360.1
c61240_g1_i1	4.55225	Medtr7g018090.1
c69184_g2_i1	4.55084	Medtr7g088825.1
c69772_g3_i1	4.5508	Medtr3g061150.1
c50942_g1_i1	4.55025	Medtr3g096555.1
c73807_g2_i1	4.54929	Medtr8g028220.1
c63330_g1_i1	4.54919	Medtr4g029210.1
c20189_g1_i1	4.54115	Medtr6g008170.1
c78100_g1_i1	4.53969	Medtr2g037850.3
c81655_g1_i3	4.53613	Medtr6g018315.1
c66786_g1_i2	4.53249	Medtr8g076940.1
c57336_g1_i1	4.52618	Medtr3g077250.1
c24919_g1_i1	4.52476	Medtr4g128410.1
c54265_g1_i1	4.5241	Medtr0856s0010.1
c76519_g1_i3	4.52399	Medtr7g065290.1
c68991_g1_i1	4.51444	Medtr3g111800.2
c64915_g1_i1	4.51355	Glyma.08G289100.2.p
c76185_g1_i1	4.51325	Medtr6g004940.2
c60168_g1_i1	4.5119	Medtr2g104050.1
c50040_g1_i1	4.50691	Medtr3g436390.1
c37558_g1_i1	4.50628	Medtr3g106560.3
c72842_g3_i3	4.50511	Medtr2g039770.1
c69598_g1_i1	4.50229	Medtr2g035840.1
c60747_g1_i1	4.49954	Medtr5g081550.1
c58353_g1_i1	4.49609	Medtr2g011600.2
c55079_g1_i2	4.49087	Medtr2g014440.1
c54405_g1_i2	4.49075	Medtr8g009980.1
c36978_g1_i1	4.482	Medtr8g471180.1
c82116_g1_i1	4.48148	Medtr3g011820.1
c20441_g1_i1	4.47636	Medtr3g088675.1
c58743_g1_i1	4.47299	Medtr3g111410.1
c47773_g1_i1	4.4726	Medtr3g067730.1
c63160_g1_i1	4.46458	Medtr0009s0370.1
c78414_g1_i1	4.46354	Medtr4g083660.1
c78833_g1_i1	4.46025	Medtr4g124470.1
c81436_g2_i1	4.45976	Medtr3g461480.1
c59121_g1_i1	4.45775	Glyma.11G011500.2.p
c77168_g2_i1	4.45356	Medtr3g463270.1
c48366_g1_i2	4.45038	Medtr8g023445.1
c63505_g1_i1	4.43488	Medtr1g110270.1
c62077_g1_i1	4.43242	Medtr5g077170.1
c78310_g1_i1	4.42373	Medtr8g027750.1
c63499_g1_i1	4.42298	Medtr3g058410.1
c78113_g2_i1	4.42297	Medtr5g029580.1
c57210_g1_i1	4.42258	Medtr7g012000.1
c41857_g1_i1	4.42095	Medtr2g036070.1
c64874_g1_i1	4.41787	Medtr3g092200.1
c37936_g1_i1	4.41524	Medtr2g055250.1
c76169_g2_i1	4.41033	Medtr0260s0010.1
c80820_g2_i1	4.40918	Medtr6g083940.1
c48626_g1_i1	4.4058	Medtr1g010150.1
c55971_g1_i1	4.40423	Medtr4g077510.1
c59374_g1_i1	4.39963	Medtr8g012795.1
c77573_g1_i2	4.39525	Medtr3g073070.1
c79960_g2_i1	4.39042	Medtr8g104110.1
c76630_g4_i1	4.38996	Medtr8g007095.1
c74382_g1_i1	4.38716	Medtr7g100120.1
c66145_g1_i1	4.38659	Medtr8g106560.2
c43202_g1_i1	4.3817	Medtr2g038030.2
c49986_g1_i1	4.37931	Medtr1g014700.1
c58890_g1_i1	4.37864	Medtr7g068290.1
c79301_g1_i1	4.37274	Medtr5g030600.1
c54337_g1_i2	4.36806	Medtr4g006070.1
c44047_g1_i1	4.36463	Medtr5g011540.1
c63008_g1_i1	4.36209	Medtr1g029130.1
c66436_g1_i1	4.36171	Medtr1g009760.1
c77021_g3_i1	4.36048	Medtr1g073420.1
c71238_g1_i1	4.36036	Medtr3g436680.1
c54674_g1_i1	4.35863	Glyma.11G079600.1.p
c59098_g1_i1	4.35659	Glyma.04G013400.1.p
c63946_g1_i1	4.35658	Medtr6g011330.1
c61364_g1_i1	4.35346	Medtr2g089210.1
c55349_g1_i1	4.3489	Medtr8g087730.1
c47085_g1_i1	4.34603	Medtr5g055020.1
c63433_g1_i1	4.34425	Medtr1g034480.1
c82016_g2_i1	4.34371	Medtr5g080530.1
c76668_g1_i3	4.34269	Medtr8g011560.1
c57468_g1_i1	4.33852	Medtr4g059560.2
c66756_g1_i1	4.33641	Medtr3g092840.1
c49724_g1_i1	4.33559	Medtr2g035430.1
c65585_g1_i1	4.33462	Medtr2g034580.1
c56327_g1_i2	4.32928	Medtr0003s0580.1
c42760_g1_i1	4.32217	Medtr2g007880.1
c56289_g1_i1	4.31986	Medtr1g088680.1
c79143_g2_i1	4.31449	Medtr3g437580.1
c72032_g2_i1	4.31306	Medtr1g090060.1
c61105_g1_i1	4.31306	Medtr8g086520.3
c65945_g1_i2	4.30923	Medtr5g014640.1
c58861_g1_i1	4.30509	Medtr7g095680.1
c67351_g2_i1	4.3029	Medtr1g019970.1
c67714_g1_i1	4.29814	Medtr6g016260.1
c68218_g1_i1	4.29661	Medtr6g038730.1
c74473_g2_i1	4.2923	Medtr1g093780.1
c61635_g1_i1	4.28816	Medtr5g079920.1
c65262_g1_i1	4.28444	Medtr3g115450.1
c56586_g1_i1	4.28317	Medtr3g088460.1
c63327_g1_i1	4.28196	Medtr3g103070.2
c79443_g1_i1	4.2818	Medtr7g096880.1
c64479_g1_i1	4.27946	Medtr0022s0430.1
c23796_g1_i1	4.27702	Medtr3g071990.2
c66833_g1_i1	4.27521	Medtr3g088465.1
c64885_g1_i1	4.2698	Medtr8g099065.2
c74010_g1_i2	4.26794	Medtr6g033350.1
c65380_g1_i1	4.26612	Medtr1g026810.4
c79002_g1_i3	4.26481	Medtr4g050930.2
c81818_g1_i1	4.26333	Medtr4g021260.1
c78702_g1_i1	4.26112	Medtr0014s0440.3
c73287_g2_i1	4.26012	Medtr8g080340.1
c76461_g1_i2	4.25242	Medtr4g016510.1
c66371_g1_i1	4.24566	Medtr3g023930.1
c67394_g1_i1	4.24092	Medtr4g115930.4
c80610_g1_i1	4.24041	Medtr3g467430.1
c73693_g1_i3	4.23429	Medtr3g082740.1
c66860_g1_i1	4.23081	Medtr4g127630.1
c48415_g1_i1	4.22803	Medtr4g077620.1
c50265_g1_i1	4.22574	Glyma.13G137100.2.p
c60247_g2_i1	4.22557	Medtr1g100100.1
c70934_g1_i1	4.22137	Medtr3g063180.1
c56661_g1_i1	4.21992	AT1G77940.1
c74360_g1_i1	4.2163	Medtr4g047870.2
c67895_g1_i3	4.21531	Medtr3g116810.1
c58416_g1_i1	4.21385	Medtr2g026725.1
c64800_g1_i1	4.21308	Medtr2g090710.1
c61209_g1_i1	4.21216	Medtr1g058350.1
c9882_g1_i1	4.21117	Medtr3g112000.1
c66304_g1_i1	4.2086	Medtr3g098380.1
c47985_g1_i1	4.20732	Medtr3g102560.1
c80741_g1_i2	4.20688	Medtr4g079100.1
c47895_g1_i1	4.20481	Medtr8g104930.1
c63479_g1_i1	4.20457	Medtr3g096370.1
c44863_g1_i1	4.20229	AT3G23390.1
c50372_g1_i1	4.20047	Medtr7g106910.1
c66689_g2_i1	4.19714	Medtr4g100650.1
c77018_g2_i1	4.19671	Medtr2g011630.3
c51902_g1_i2	4.19654	Medtr7g056567.1
c5537_g1_i1	4.19163	Medtr1g022495.1
c63333_g1_i1	4.19088	Medtr5g053590.1
c63488_g1_i1	4.18831	Medtr4g005860.1
c52315_g1_i1	4.18526	Medtr1g073170.1
c70098_g1_i2	4.18497	Medtr8g039140.2
c73337_g1_i1	4.18448	Medtr6g012730.2
c57500_g1_i1	4.18298	Medtr7g103490.2
c66854_g1_i1	4.17592	Medtr5g031250.1
c54132_g1_i1	4.17481	Medtr7g070940.1
c49318_g1_i1	4.16941	Medtr4g011370.1
c55652_g1_i1	4.16811	Medtr1g029540.1
c37258_g1_i2	4.16692	Medtr4g015850.1
c74521_g1_i1	4.16569	Medtr1g089130.1
c74117_g1_i3	4.16184	Medtr3g112050.1
c64955_g1_i1	4.15325	Medtr4g013315.1
c63551_g1_i1	4.15177	Medtr3g012090.1
c56598_g1_i1	4.14929	Medtr4g115880.1
c76948_g2_i1	4.14877	Medtr2g033170.1
c73284_g1_i1	4.14803	Medtr1g048720.4
c68869_g1_i1	4.14606	Medtr6g027460.1
c73519_g1_i2	4.1432	Medtr7g089905.1
c77339_g2_i1	4.14237	Medtr4g046713.1
c74150_g1_i3	4.14017	Medtr8g018100.1
c65954_g1_i1	4.13809	Medtr7g111010.1
c56216_g1_i1	4.13676	Medtr7g405790.1
c69198_g1_i1	4.13459	Medtr5g038380.1
c55879_g1_i1	4.13037	Medtr1g015620.1
c53670_g1_i1	4.1295	Medtr3g093120.1
c58639_g1_i1	4.12803	Medtr4g109110.2
c73388_g1_i3	4.12136	Medtr6g088270.1
c60097_g1_i1	4.12052	Medtr4g116273.1
c67081_g1_i2	4.12005	Medtr5g066760.1
c72322_g2_i1	4.11842	Medtr4g031235.1
c75489_g1_i1	4.11798	Medtr8g070070.1
c53936_g1_i1	4.11678	Medtr2g054380.1
c55791_g1_i1	4.11584	Medtr8g079250.1
c60445_g1_i1	4.11511	Medtr4g133932.1
c67540_g1_i1	4.11237	Glyma.12G146600.1.p
c72896_g1_i1	4.11053	Medtr3g463370.1
c48830_g1_i1	4.11024	Medtr8g020300.1
c72066_g1_i1	4.10812	Medtr6g012830.2
c64499_g1_i2	4.10647	Medtr7g010750.1
c79926_g2_i1	4.10551	Medtr6g086270.1
c59703_g1_i1	4.1052	Medtr1g101870.1
c67008_g2_i1	4.10257	Medtr4g076520.1
c80097_g2_i1	4.09865	Medtr5g066380.1
c65597_g1_i1	4.095	Medtr6g034515.1
c75158_g1_i2	4.09319	AT1G76130.1
c60802_g2_i1	4.09283	Medtr7g090750.1
c61848_g1_i1	4.09237	Medtr1g109620.3
c68707_g1_i1	4.08808	Medtr5g008550.1
c71697_g1_i3	4.08635	Medtr4g459420.1
c53013_g1_i1	4.08563	Medtr2g103490.1
c66291_g1_i1	4.08208	Medtr4g077550.1
c69220_g1_i1	4.08151	Medtr2g012470.1
c61792_g1_i1	4.07956	Medtr4g088055.1
c74822_g1_i1	4.07577	Medtr7g065660.1
c70874_g1_i1	4.07235	Medtr2g084555.1
c57079_g1_i1	4.06688	Medtr5g064620.1
c57466_g1_i1	4.05867	Medtr1g023570.1
c70240_g1_i1	4.05413	Medtr5g069480.4
c73905_g1_i1	4.0536	Medtr8g020870.1
c80900_g1_i2	4.05279	Glyma.07G077700.2.p
c55242_g1_i1	4.05095	Medtr7g096210.2
c79980_g1_i1	4.04661	Medtr1g114550.1
c67603_g1_i1	4.04651	Medtr1g104890.1
c70153_g1_i1	4.04318	Medtr1g066640.1
c81844_g1_i2	4.04143	Medtr2g037690.1
c77616_g1_i1	4.03986	Medtr7g079080.1
c60979_g1_i1	4.03096	Medtr7g080920.1
c59869_g1_i1	4.02457	Medtr4g030040.2
c63272_g1_i1	4.02263	Medtr8g101290.1
c80728_g1_i2	4.02073	Glyma.17G072400.1.p
c76423_g1_i1	4.0165	Medtr1g015165.1
c36428_g1_i1	4.01526	Medtr4g122930.1
c77889_g1_i1	4.01315	Medtr1g077890.1
c53174_g1_i1	4.00542	Medtr5g042910.2
c66880_g1_i3	4.00289	Medtr7g100880.1
c64254_g1_i1	3.99288	Medtr4g129670.1
c70843_g1_i1	3.99154	Medtr6g011290.3
c69515_g1_i1	3.9899	Medtr2g012440.1
c74741_g1_i1	3.98852	Medtr0062s0020.1
c60272_g1_i1	3.98818	Medtr4g005500.1
c46619_g1_i1	3.98584	Glyma.05G078100.1.p
c77574_g1_i2	3.98516	Medtr4g073840.1
c69872_g1_i2	3.98216	Medtr7g108680.1
c78573_g1_i1	3.98215	Medtr4g090525.1
c68761_g1_i2	3.97919	Medtr3g107660.1
c66750_g2_i1	3.97856	Medtr3g099150.1
c54694_g1_i1	3.97792	Medtr7g104610.1
c67128_g1_i2	3.97765	Medtr6g088690.1
c55772_g1_i1	3.97471	Medtr3g111410.1
c75454_g1_i1	3.9742	Medtr2g014040.1
c64176_g1_i1	3.97301	Medtr5g042920.1
c57772_g1_i1	3.97194	Medtr6g044010.1
c51939_g1_i1	3.96324	Medtr1g098680.1
c81590_g1_i1	3.9613	Medtr6g007757.1
c50897_g1_i1	3.95854	Medtr6g015460.1
c71566_g1_i1	3.95781	Medtr5g097270.1
c75409_g1_i1	3.95754	Medtr7g112615.1
c67910_g1_i1	3.95475	Medtr5g095650.2
c71749_g1_i1	3.95315	Glyma.08G093600.1.p
c59394_g1_i2	3.95282	Medtr6g092940.1
c71078_g1_i1	3.94696	Medtr8g028785.1
c78027_g1_i1	3.94564	Medtr1g093100.1
c57448_g1_i1	3.94471	Medtr4g077940.1
c59472_g1_i1	3.94235	Medtr8g063270.1
c50888_g1_i1	3.94001	Medtr5g030580.1
c39884_g1_i1	3.93954	Medtr4g119830.1
c67727_g1_i1	3.9358	Medtr2g087950.1
c80232_g1_i1	3.93367	Medtr4g082590.1
c69955_g1_i1	3.92762	Medtr3g092150.1
c69339_g1_i1	3.9187	Medtr4g088225.1
c52114_g1_i1	3.91758	Medtr3g466170.1
c80959_g1_i2	3.91443	Medtr5g034570.4
c70424_g1_i1	3.91441	Medtr8g027200.1
c78534_g1_i2	3.91288	Medtr7g062280.1
c78852_g1_i2	3.91069	Medtr2g069273.1
c67399_g1_i1	3.90847	Glyma.18G084500.1.p
c56491_g1_i1	3.90092	Medtr4g075520.1
c71104_g1_i1	3.90066	Medtr6g471080.1
c58622_g1_i2	3.8972	Medtr1g073360.3
c71385_g2_i1	3.89311	Medtr5g049280.1
c67906_g1_i1	3.88916	Medtr1g061170.2
c59850_g1_i1	3.88846	Glyma.20G199600.1.p
c61805_g1_i1	3.88768	Medtr8g096920.1
c67012_g1_i1	3.88617	Medtr4g091200.1
c62848_g1_i1	3.88541	Medtr1g075330.1
c58808_g2_i1	3.88342	Medtr3g452180.1
c77792_g1_i1	3.88231	Medtr8g099065.1
c63952_g1_i1	3.87986	Medtr3g083960.1
c88052_g1_i1	3.87723	Medtr4g084520.1
c72854_g1_i1	3.87695	Medtr1g103420.1
c72565_g1_i1	3.87463	Medtr6g464510.1
c73977_g2_i1	3.87248	Medtr1g086530.1
c62027_g1_i1	3.87182	Medtr4g077370.1
c71518_g1_i1	3.86844	Medtr8g090180.1
c74647_g1_i1	3.86417	Medtr2g005830.1
c73170_g1_i1	3.86284	Medtr3g058670.1
c74339_g2_i1	3.8617	Medtr8g090105.1
c70153_g1_i3	3.86124	Medtr1g066380.1
c80251_g1_i1	3.86017	Medtr4g017030.1
c54822_g1_i1	3.85738	Medtr6g092790.1
c63084_g1_i1	3.85574	Medtr3g092550.1
c81721_g1_i5	3.85549	Medtr7g109530.3
c74595_g1_i1	3.85307	Medtr8g015910.1
c66469_g1_i1	3.8529	Medtr1g054285.1
c63710_g1_i1	3.85253	Medtr5g027030.1
c55924_g1_i1	3.85148	Medtr7g037360.1
c56106_g1_i1	3.8472	Medtr8g038765.1
c81768_g2_i1	3.84486	Medtr8g028140.1
c72117_g1_i1	3.84242	Medtr7g068770.1
c51072_g1_i1	3.8418	Medtr7g029555.1
c69929_g2_i1	3.83789	Medtr4g014490.1
c57673_g1_i1	3.83209	Medtr3g008020.1
c69336_g1_i1	3.83057	Medtr2g016190.1
c63360_g1_i1	3.82995	Medtr7g450930.2
c73187_g1_i1	3.82782	Medtr5g070850.1
c69007_g1_i1	3.82362	Medtr3g070890.3
c61930_g1_i1	3.82284	Medtr2g090740.1
c70704_g1_i1	3.82028	Medtr4g035100.3
c71194_g1_i5	3.8201	Medtr3g083130.1
c63951_g1_i1	3.81971	Medtr1g078370.1
c81311_g4_i1	3.81936	Medtr8g089380.1
c65888_g1_i1	3.81783	Medtr8g028600.1
c60466_g1_i1	3.81548	Medtr8g103850.1
c81497_g1_i3	3.81463	Medtr3g466590.1
c79747_g1_i1	3.81175	Medtr7g080900.1
c66913_g1_i1	3.80912	Medtr7g105640.1
c64136_g1_i1	3.80365	Medtr6g059650.1
c63190_g1_i1	3.80323	Medtr5g021180.1
c67790_g1_i1	3.80202	Medtr3g065480.1
c54414_g1_i1	3.79888	Medtr4g094545.1
c62942_g1_i1	3.79539	Medtr5g067840.1
c70260_g1_i1	3.79202	Medtr2g061790.2
c72941_g1_i1	3.78995	Medtr2g018175.1
c64525_g1_i1	3.78983	Medtr5g042920.1
c58129_g1_i1	3.78604	Medtr7g006750.1
c64855_g2_i1	3.78468	Medtr8g102480.1
c73909_g2_i3	3.78324	Medtr8g012620.1
c79200_g2_i1	3.78046	Medtr0289s0030.1
c61149_g1_i1	3.77862	Medtr2g023450.1
c67274_g1_i1	3.77841	Medtr3g070390.4
c78522_g1_i2	3.77489	Medtr8g432490.1
c59817_g1_i1	3.77312	Medtr5g032660.1
c72990_g1_i2	3.76542	Medtr7g033100.2
c76972_g1_i4	3.76283	Medtr3g037390.1
c79379_g1_i2	3.75739	Medtr8g059170.1
c62924_g1_i1	3.75728	Medtr2g461920.1
c62007_g1_i1	3.75197	Medtr3g111870.1
c60442_g1_i1	3.7474	Medtr5g064620.1
c64808_g1_i1	3.74024	Medtr1g094185.1
c65562_g1_i1	3.73694	Medtr4g130490.4
c48955_g1_i1	3.73463	Medtr4g114000.1
c58891_g1_i1	3.73151	Medtr8g106695.1
c73227_g1_i1	3.73055	Medtr4g035330.1
c50697_g1_i1	3.73032	Medtr1g112780.1
c65858_g1_i1	3.73021	Glyma.09G093000.3.p
c73358_g2_i1	3.72665	Medtr8g066210.1
c66977_g1_i2	3.72576	Glyma.02G013900.1.p
c79987_g3_i1	3.72532	Medtr3g116255.1
c53285_g1_i1	3.72489	Medtr2g016200.1
c74558_g1_i1	3.72445	Medtr7g009820.1
c71108_g1_i1	3.72381	Medtr6g013050.1
c68620_g1_i1	3.72204	Medtr1g019360.1
c70630_g1_i3	3.7161	Medtr8g063300.1
c67248_g1_i2	3.71152	Medtr2g014240.1
c75957_g2_i1	3.7107	Medtr3g083500.2
c69600_g1_i1	3.70967	Medtr3g099010.1
c69270_g1_i1	3.70839	Medtr3g030050.1
c49329_g1_i1	3.70824	Medtr7g089950.1
c71208_g1_i2	3.7053	Medtr4g072360.1
c75479_g1_i5	3.70517	Medtr1g106085.1
c55315_g1_i1	3.70498	Medtr7g070500.1
c50294_g1_i1	3.70373	Medtr1g076990.1
c66645_g1_i1	3.70131	Medtr8g078200.1
c67555_g1_i1	3.69488	Medtr2g041610.1
c41935_g1_i1	3.69365	Medtr2g022760.2
c48521_g1_i1	3.69274	Medtr8g106640.3
c79982_g1_i1	3.69064	Medtr1g050478.1
c66294_g1_i2	3.68817	Medtr1g030630.1
c63264_g1_i1	3.68793	Medtr8g031360.1
c72435_g3_i1	3.68762	Medtr2g085300.1
c46545_g1_i1	3.68643	Medtr1g012550.1
c69306_g2_i7	3.68323	Medtr5g084530.2
c71541_g2_i1	3.6819	Medtr6g018400.1
c66077_g2_i1	3.68155	Medtr6g022790.1
c70110_g1_i1	3.67628	Medtr8g076820.1
c54073_g1_i1	3.6762	Medtr7g017330.1
c79969_g1_i3	3.67408	Medtr5g037400.1
c80775_g1_i1	3.67388	Medtr5g035665.1
c48791_g1_i1	3.6735	Medtr8g043760.1
c80513_g1_i1	3.67215	Medtr2g059240.1
c6976_g1_i1	3.67192	Medtr2g086640.1
c66965_g1_i1	3.66671	Medtr4g006730.3
c67139_g1_i1	3.66605	Medtr7g090940.2
c36329_g1_i1	3.66125	Medtr7g109560.1
c64700_g1_i2	3.66079	Medtr5g021000.1
c67406_g2_i1	3.66043	Medtr6g015315.1
c62390_g1_i1	3.65933	Medtr7g103520.1
c81692_g1_i1	3.65464	Medtr1g115340.1
c81626_g2_i1	3.65433	Medtr4g124000.2
c65881_g1_i1	3.65376	Medtr8g091680.1
c79746_g1_i2	3.65363	Medtr4g020110.1
c72288_g1_i1	3.65062	Glyma.13G247200.1.p
c74535_g1_i1	3.64593	Medtr7g113410.1
c80610_g1_i3	3.64529	Medtr3g467420.1
c82007_g3_i1	3.64511	Medtr6g034755.1
c78133_g1_i5	3.64467	Medtr4g094550.1
c58897_g1_i1	3.64373	Medtr2g076680.1
c66121_g1_i1	3.64136	Medtr3g103970.1
c74422_g1_i4	3.63885	Medtr7g069580.2
c54746_g1_i1	3.63643	Medtr3g056270.1
c77396_g1_i2	3.63577	Medtr4g101030.1
c74130_g1_i1	3.6346	Medtr8g096570.1
c75765_g1_i1	3.63013	Medtr3g109120.3
c52990_g1_i2	3.62968	Medtr8g463800.1
c70368_g1_i1	3.6284	Medtr7g010800.1
c77736_g1_i1	3.62695	Medtr8g089925.2
c78353_g2_i1	3.62681	Medtr4g087110.1
c69504_g1_i1	3.61689	Medtr3g098910.1
c68675_g1_i1	3.61596	Glyma.12G184900.2.p
c68370_g2_i1	3.61517	Medtr7g038700.2
c78138_g2_i1	3.61454	Medtr8g080800.1
c55578_g1_i1	3.61443	Medtr8g071300.1
c74885_g1_i2	3.60427	Medtr4g073840.1
c70594_g1_i1	3.60268	Medtr4g120220.1
c54681_g1_i2	3.59967	Medtr1g043320.1
c77835_g1_i2	3.59954	Medtr4g032670.1
c67565_g1_i1	3.59637	Glyma.06G081700.1.p
c67645_g1_i2	3.5956	Medtr7g006690.1
c66903_g1_i1	3.59234	Medtr4g073840.1
c73059_g1_i2	3.59175	Medtr3g089090.1
c34284_g1_i1	3.5913	Medtr4g100950.1
c71807_g2_i1	3.5857	Medtr2g096950.1
c65654_g1_i1	3.58481	Medtr2g026725.1
c45055_g1_i1	3.5847	Medtr3g068130.1
c63290_g1_i1	3.58176	Medtr2g018590.1
c60116_g1_i1	3.58048	Medtr3g083960.1
c43233_g1_i1	3.57491	Medtr4g106800.1
c45566_g1_i1	3.57181	Medtr7g093010.1
c59745_g1_i1	3.5697	Medtr4g134280.1
c65820_g1_i1	3.56498	Medtr4g097470.1
c78214_g1_i1	3.56392	Medtr7g072420.1
c51690_g1_i1	3.56268	Medtr3g045440.1
c78133_g1_i2	3.55984	Medtr4g094560.1
c59712_g1_i1	3.55965	Medtr3g019360.1
c70915_g1_i1	3.55919	Medtr2g040010.1
c64241_g1_i1	3.55875	Medtr8g012320.1
c76184_g1_i1	3.55618	Medtr4g023590.1
c81154_g1_i1	3.5561	Medtr3g088790.1
c74802_g1_i3	3.55531	Medtr8g010620.1
c37659_g1_i1	3.54876	Medtr8g028325.1
c78106_g2_i1	3.54264	Glyma.02G125400.8.p
c54681_g1_i1	3.53928	Medtr1g043320.1
c65621_g1_i1	3.53213	Medtr5g043645.1
c79859_g1_i3	3.53027	Medtr1g068830.1
c81777_g3_i1	3.52207	Medtr1g058390.1
c72304_g1_i1	3.52139	Medtr3g117850.1
c54362_g1_i2	3.5213	Medtr1g099380.1
c44260_g1_i1	3.52027	Medtr3g462080.1
c79170_g1_i4	3.51427	Glyma.13G011700.1.p
c61094_g1_i1	3.51259	Medtr8g027495.1
c72885_g1_i1	3.51071	Medtr8g067265.1
c76945_g1_i1	3.50965	Medtr6g488100.1
c77622_g1_i2	3.50764	Medtr7g034355.1
c71302_g1_i1	3.5074	Glyma.08G242100.2.p
c34854_g1_i1	3.50489	Medtr4g094598.2
c79592_g1_i2	3.50121	Medtr1g098460.1
c72952_g1_i1	3.50092	Medtr2g096180.2
c80783_g1_i4	3.49954	Medtr3g107930.2
c49548_g1_i1	3.4983	Glyma.12G077800.1.p
c74459_g1_i1	3.49619	Medtr0020s0120.1
c58781_g1_i1	3.49475	Medtr8g094810.1
c68888_g1_i2	3.49315	Glyma.08G253400.1.p
c67854_g1_i1	3.49093	Glyma.09G213500.1.p
c64642_g1_i1	3.48211	Medtr4g082310.1
c72834_g1_i1	3.4821	Medtr2g079990.1
c64851_g1_i1	3.478	Medtr1g088260.1
c68718_g1_i1	3.47748	Medtr1g076640.1
c79672_g4_i1	3.47571	Medtr1g007160.1
c69824_g1_i1	3.47223	Medtr5g061300.1
c65383_g1_i1	3.47111	Medtr1g032430.2
c73116_g1_i3	3.47106	Medtr3g030055.1
c55478_g1_i1	3.46841	Glyma.04G073100.1.p
c48478_g1_i1	3.46509	Glyma.19G256500.1.p
c70890_g1_i2	3.46499	Medtr4g021820.1
c66767_g1_i1	3.46463	Medtr8g091910.1
c70994_g3_i1	3.46197	Medtr3g094630.1
c70994_g2_i1	3.46055	Medtr5g083860.1
c73045_g1_i2	3.45591	Medtr4g063710.1
c58602_g2_i1	3.45497	Medtr2g062600.1
c66962_g1_i1	3.4547	Medtr1g090687.1
c51389_g1_i1	3.45444	Medtr4g005160.1
c72751_g2_i5	3.45269	Medtr6g073650.1
c65678_g1_i1	3.45253	Medtr6g088670.1
c80430_g1_i1	3.45116	Medtr6g042660.1
c68804_g1_i1	3.45042	Medtr2g104530.1
c71685_g1_i1	3.44877	Medtr1g050670.2
c77624_g1_i1	3.44845	Medtr1g076880.1
c67034_g1_i2	3.44647	Medtr4g028360.1
c62394_g1_i1	3.44318	Medtr3g088520.2
c41253_g1_i1	3.44248	Medtr5g014300.1
c81102_g1_i2	3.44203	Medtr4g037690.1
c74564_g1_i3	3.44095	Medtr8g078170.1
c72175_g2_i3	3.43942	Medtr2g021190.1
c65563_g1_i1	3.43527	Medtr3g112530.1
c67620_g1_i1	3.43201	Medtr5g066330.3
c79323_g1_i1	3.43081	Glyma.19G013200.1.p
c65586_g1_i1	3.43003	Medtr5g066080.1
c70465_g1_i2	3.42787	Medtr1g030220.1
c78505_g1_i4	3.41934	Medtr6g465690.1
c69006_g1_i1	3.41765	Medtr2g018600.1
c70582_g1_i2	3.41762	Medtr3g035650.1
c65895_g1_i2	3.41695	Medtr0311s0010.1
c79443_g2_i1	3.4151	Medtr7g096870.1
c69591_g1_i1	3.41472	Medtr5g016890.1
c78406_g1_i8	3.41002	Medtr2g032710.2
c73270_g1_i1	3.40467	Medtr3g103580.1
c81279_g1_i1	3.40354	Medtr3g104920.2
c76011_g1_i2	3.40123	Medtr5g042520.1
c63928_g1_i1	3.39955	Medtr1g102230.1
c60891_g1_i1	3.3986	Medtr8g099535.1
c75975_g2_i1	3.39668	Medtr3g085020.1
c56458_g1_i1	3.39398	Medtr3g037080.1
c65156_g1_i1	3.39388	Medtr7g011663.1
c67788_g1_i2	3.39115	Medtr8g027255.1
c75211_g1_i1	3.3909	Medtr2g436540.1
c44591_g1_i1	3.38837	Medtr7g080980.1
c68572_g1_i1	3.38612	Medtr7g022790.1
c68782_g1_i1	3.38456	Medtr7g117415.1
c74871_g1_i2	3.38022	Medtr4g073840.1
c77865_g1_i2	3.37978	Medtr3g116860.1
c77177_g1_i1	3.37592	Medtr6g028100.2
c70270_g1_i1	3.37548	Medtr8g098915.1
c81696_g1_i1	3.37504	Medtr1g046350.1
c75491_g2_i2	3.37503	Medtr3g077550.1
c72290_g1_i1	3.37085	Medtr3g101780.2
c64043_g2_i1	3.36948	Medtr4g080060.2
c75578_g1_i1	3.36622	Medtr7g112560.1
c69161_g1_i1	3.3652	Medtr4g114080.1
c74950_g1_i1	3.36491	Medtr3g073560.1
c78714_g1_i2	3.3631	Medtr2g038040.1
c72836_g1_i2	3.3616	Medtr2g068840.1
c64462_g1_i1	3.36109	Medtr7g065050.1
c62927_g1_i1	3.35932	Medtr5g013070.1
c74034_g3_i1	3.35607	Medtr8g087650.3
c59305_g1_i1	3.35605	Medtr8g088520.1
c73719_g1_i1	3.35537	Medtr6g053620.2
c62233_g1_i1	3.35238	Medtr2g014410.1
c78899_g1_i1	3.35054	Medtr4g081675.1
c75529_g1_i1	3.3504	Medtr4g095075.1
c71215_g1_i1	3.35031	Medtr3g101930.1
c77099_g1_i1	3.34707	Medtr8g042410.1
c78180_g1_i1	3.34169	Medtr8g061360.1
c57026_g1_i1	3.33864	Medtr5g083770.1
c62572_g1_i1	3.33201	Glyma.19G213200.3.p
c65426_g1_i1	3.33096	Medtr7g088040.1
c58292_g1_i1	3.3309	Medtr3g055900.1
c73979_g1_i2	3.33069	Medtr3g108240.3
c80619_g1_i2	3.32107	Medtr2g060350.1
c22526_g1_i2	3.32104	Medtr4g133600.2
c65418_g1_i1	3.31696	AT1G29965.1
c81247_g2_i1	3.31681	Medtr5g062190.1
c73461_g2_i1	3.3111	Medtr5g096570.1
c75225_g1_i2	3.31082	Medtr2g008030.1
c62130_g1_i1	3.31077	Medtr1g028510.1
c69852_g1_i1	3.31065	Medtr4g089105.1
c74722_g1_i1	3.31026	Medtr4g081870.1
c75822_g2_i2	3.30874	Medtr8g103490.1
c74198_g1_i1	3.30816	Medtr2g018590.1
c68069_g1_i1	3.30567	Medtr1g006990.1
c54326_g1_i1	3.3027	Medtr7g115600.1
c80728_g1_i1	3.30185	Medtr4g063710.1
c33033_g1_i1	3.29772	Medtr3g088510.1
c75509_g2_i1	3.2965	Medtr5g007520.1
c60291_g1_i1	3.29551	Medtr8g091530.1
c73543_g1_i1	3.29541	Medtr2g038080.2
c55906_g1_i1	3.29211	Medtr2g028420.1
c59457_g1_i1	3.29114	Medtr8g027450.1
c68346_g1_i1	3.28934	Medtr2g072930.1
c70868_g1_i1	3.28826	Medtr7g109350.1
c75030_g1_i1	3.28784	Medtr5g042590.1
c69529_g1_i1	3.28507	Glyma.17G077500.1.p
c65603_g1_i1	3.28481	Medtr1g111990.1
c80132_g3_i1	3.27824	AT5G60390.3
c74407_g1_i1	3.27671	Medtr1g025490.1
c75796_g1_i1	3.27516	Medtr3g466180.1
c71136_g1_i2	3.27479	Medtr8g101480.1
c79669_g1_i2	3.27145	Medtr7g077870.1
c62888_g1_i1	3.27053	Medtr7g104190.1
c76698_g1_i1	3.26948	Medtr5g076180.5
c73815_g3_i1	3.26811	Medtr2g031990.1
c63307_g1_i1	3.26763	Medtr5g017720.1
c72914_g2_i2	3.26463	Medtr5g053590.1
c68291_g1_i1	3.25977	Medtr4g087895.1
c59943_g1_i1	3.2539	Medtr8g012080.1
c78671_g1_i1	3.24687	Medtr7g029630.1
c72108_g1_i1	3.24611	Medtr1g008740.1
c80174_g1_i4	3.24435	Medtr1g075310.1
c81894_g1_i3	3.24315	Medtr8g090165.1
c65592_g1_i1	3.24271	Glyma.07G269400.1.p
c69829_g1_i1	3.24208	Medtr2g039320.1
c54884_g1_i1	3.24052	Medtr8g102240.1
c73296_g1_i1	3.23432	Medtr8g080980.1
c80207_g3_i1	3.2305	AT3G12110.1
c46210_g1_i1	3.22926	Medtr8g070770.1
c59965_g1_i1	3.22784	Medtr2g011180.1
c70147_g1_i1	3.22525	Medtr1g057130.1
c80527_g3_i1	3.22423	Medtr3g069190.1
c57842_g1_i1	3.22371	AT4G29090.1
c71023_g1_i1	3.22155	Medtr2g016060.1
c44888_g1_i1	3.22032	Medtr3g103420.1
c66051_g1_i1	3.22012	Medtr1g062130.1
c72239_g1_i1	3.22005	Medtr3g100120.1
c62545_g1_i1	3.21918	Medtr4g102900.1
c78000_g1_i1	3.2182	Medtr1g109490.1
c67504_g1_i1	3.21296	Medtr3g114010.1
c72125_g1_i1	3.20635	Medtr1g058610.1
c78614_g1_i1	3.20513	Medtr2g024970.1
c72946_g1_i1	3.20255	Medtr8g023510.1
c81708_g1_i2	3.20204	Medtr3g011820.1
c71671_g1_i1	3.20135	Medtr2g027010.1
c70732_g1_i2	3.19775	Medtr1g013760.1
c68868_g1_i1	3.19189	Medtr4g485640.1
c66381_g1_i1	3.19109	Medtr4g117040.1
c72376_g1_i1	3.18951	Medtr7g082570.1
c66823_g1_i1	3.1885	Medtr2g079490.1
c78039_g1_i1	3.18555	Medtr3g464580.3
c57800_g1_i1	3.18231	Medtr4g083580.1
c72932_g1_i1	3.17791	Medtr3g466400.1
c66648_g1_i1	3.17568	Medtr4g009620.1
c56308_g1_i1	3.17534	Medtr2g103990.4
c63622_g1_i1	3.17314	Medtr4g118800.1
c73606_g1_i1	3.17067	Medtr1g088620.1
c54425_g1_i1	3.16892	Medtr7g087880.1
c76199_g1_i1	3.16642	Medtr4g114930.1
c56921_g1_i1	3.16501	Glyma.18G007500.1.p
c81354_g2_i2	3.16356	Medtr5g056140.1
c70232_g1_i1	3.16052	Glyma.19G252300.1.p
c77005_g1_i1	3.15959	Medtr5g030770.1
c64056_g1_i1	3.15953	Medtr5g004720.1
c66474_g1_i1	3.15564	Medtr3g072650.1
c51685_g1_i1	3.15403	Medtr3g449470.1
c67259_g1_i2	3.15286	Medtr5g089520.1
c57758_g1_i1	3.15174	Medtr8g089250.2
c63088_g1_i1	3.15108	Glyma.17G217600.1.p
c58046_g1_i1	3.1455	Medtr2g020440.2
c55440_g1_i3	3.1437	Medtr6g007637.1
c75156_g1_i2	3.14121	Glyma.02G276300.1.p
c77597_g3_i1	3.13698	Medtr4g023000.1
c74249_g1_i1	3.13505	Medtr6g005210.1
c77303_g1_i2	3.13167	Medtr2g461920.1
c37420_g1_i1	3.13139	Medtr1g100653.1
c75446_g1_i1	3.12907	Glyma.16G204600.1.p
c66026_g1_i1	3.12829	Medtr6g028140.1
c76082_g1_i1	3.1282	Medtr3g070010.1
c60136_g1_i1	3.124	Medtr5g057040.1
c75727_g1_i1	3.1173	Medtr0048s0090.1
c69140_g1_i1	3.11205	Medtr3g110450.1
c66876_g1_i1	3.11114	Medtr8g089530.1
c77355_g1_i1	3.11078	Medtr5g082520.1
c58383_g1_i1	3.10908	Medtr4g107970.1
c64880_g1_i1	3.10766	Medtr4g032565.1
c64463_g1_i1	3.09991	Medtr7g072410.1
c60181_g1_i1	3.09979	AT5G35530.1
c59218_g1_i1	3.09498	Glyma.16G029900.2.p
c76235_g1_i1	3.0942	Glyma.04G167600.1.p
c82105_g2_i2	3.08863	Medtr8g031480.1
c79980_g1_i2	3.08782	Medtr3g046875.1
c52237_g1_i1	3.08398	Medtr1g109630.1
c51097_g1_i1	3.08322	Glyma.20G085100.1.p
c69067_g1_i1	3.08204	Medtr5g018680.1
c44575_g1_i1	3.07937	Medtr3g006170.1
c79563_g1_i1	3.07864	Medtr2g022490.1
c67281_g1_i1	3.07632	Medtr5g077540.1
c81276_g1_i4	3.07579	Medtr5g076960.1
c57798_g1_i1	3.07289	Medtr5g029070.2
c78138_g1_i1	3.07004	Medtr3g085050.2
c63722_g2_i1	3.06696	Medtr2g101610.1
c75311_g2_i1	3.06693	Medtr7g046490.1
c70028_g1_i1	3.06629	Medtr3g109340.1
c76172_g1_i2	3.06121	Medtr4g073520.1
c59104_g1_i2	3.06111	Medtr1g115325.1
c56961_g1_i1	3.05946	Medtr1350s0010.1
c77093_g3_i1	3.05908	Glyma.U009300.1.p
c56677_g1_i1	3.05861	Medtr5g040080.1
c49740_g1_i1	3.05672	Medtr3g019080.1
c74361_g2_i1	3.05585	Medtr7g110810.1
c66559_g2_i1	3.05568	Medtr8g056800.1
c65829_g1_i1	3.05388	Medtr1g066940.8
c67071_g1_i1	3.04904	Medtr6g083900.1
c80262_g1_i2	3.04902	Medtr3g070250.1
c68334_g1_i1	3.04768	Medtr5g025010.2
c69077_g1_i1	3.04739	Medtr8g033290.1
c77509_g2_i1	3.04693	Medtr5g032720.1
c70007_g2_i1	3.04554	Medtr2g038510.1
c71399_g1_i1	3.04505	Medtr6g013220.1
c76600_g1_i1	3.04312	Medtr2g055850.1
c76360_g1_i1	3.0421	Medtr6g007490.1
c75587_g1_i1	3.0395	Medtr5g058920.1
c70912_g1_i1	3.03671	Medtr5g034320.1
c60888_g1_i2	3.03224	Medtr4g099260.1
c53441_g1_i1	3.03111	Glyma.09G012900.1.p
c79330_g2_i4	3.03031	Medtr4g029170.1
c76614_g1_i1	3.02922	Medtr8g038100.1
c76020_g1_i1	3.02696	Medtr5g043880.1
c57179_g1_i1	3.02529	Medtr7g100230.1
c51358_g1_i1	3.02373	Medtr5g033720.1
c73108_g1_i4	3.0224	Medtr3g087510.1
c78987_g1_i1	3.01755	Medtr2g083480.1
c19456_g1_i1	3.01575	Medtr8g075140.1
c75833_g1_i1	3.0151	Medtr7g013820.1
c45790_g1_i1	3.01335	Medtr8g072360.2
c72987_g1_i1	3.01325	Medtr1g074990.1
c69734_g1_i1	3.01169	Medtr8g070640.1
c39462_g1_i1	3.00588	Glyma.14G211100.1.p
c71835_g1_i1	3.00473	Medtr7g100390.1
c69466_g1_i1	3.00433	Medtr4g076980.1
c67395_g1_i1	3.00411	Medtr2g093980.1
c68294_g1_i1	3.00023	Medtr5g078210.2
c31965_g1_i1	3.00008	Medtr6g007040.1
c60842_g1_i1	2.99973	Medtr3g102170.1
c79898_g1_i1	2.99808	Medtr3g020470.1
c70179_g1_i1	2.99695	Medtr1g041265.1
c63688_g1_i1	2.99319	Medtr1g061670.1
c73497_g1_i1	2.99305	Medtr5g082750.1
c67109_g1_i1	2.99283	Medtr8g041940.1
c61268_g1_i1	2.99114	Medtr4g109170.1
c73031_g1_i2	2.99032	Medtr1g088845.1
c73204_g1_i1	2.98815	Medtr6g023910.1
c61714_g1_i1	2.98741	Medtr4g021800.6
c63720_g1_i1	2.98584	Medtr6g055210.1
c80524_g1_i2	2.98539	Medtr6g059930.1
c79997_g1_i1	2.98386	Medtr3g462390.1
c69905_g1_i1	2.98301	Medtr5g096820.1
c57514_g1_i1	2.98029	Medtr5g090150.1
c75725_g1_i1	2.97866	Medtr8g069920.1
c68062_g1_i2	2.97825	Medtr3g088575.1
c76159_g2_i1	2.97746	Medtr5g009080.1
c47619_g1_i1	2.97323	Medtr1g036710.1
c57579_g1_i1	2.9722	Medtr4g116860.1
c72353_g1_i1	2.96741	Medtr3g100690.1
c76938_g2_i1	2.96478	Medtr7g007080.1
c65707_g1_i1	2.9633	Medtr7g075030.1
c59809_g1_i1	2.95623	Medtr2g031380.2
c60404_g1_i1	2.95133	Medtr8g036115.1
c60454_g1_i1	2.95026	Medtr1g031650.1
c77865_g1_i1	2.94687	Medtr4g070430.3
c78900_g1_i1	2.94225	Medtr8g104520.1
c73225_g1_i2	2.9397	Medtr4g129200.1
c70479_g2_i2	2.93688	Medtr2g083920.3
c31681_g1_i1	2.93425	Medtr2g088940.1
c67132_g1_i2	2.93224	Medtr0056s0160.1
c71788_g1_i1	2.93084	Medtr8g023860.1
c66410_g1_i1	2.9305	Glyma.10G147600.2.p
c58251_g1_i1	2.92434	Glyma.12G239800.1.p
c44300_g1_i1	2.91618	Medtr1g017700.1
c69306_g2_i2	2.91602	Medtr5g084530.2
c74234_g1_i1	2.91439	Medtr6g005390.1
c56666_g1_i1	2.91311	Medtr1g050512.1
c73900_g1_i1	2.91294	Medtr4g116420.1
c72022_g1_i1	2.91188	Medtr2g036490.1
c63879_g1_i1	2.91034	Medtr3g077860.1
c79592_g1_i5	2.91019	Medtr7g020980.1
c67719_g1_i1	2.90774	Medtr4g123563.1
c63819_g1_i1	2.90444	Medtr4g102530.2
c34641_g1_i1	2.90365	Glyma.18G049500.1.p
c78531_g1_i3	2.90347	Medtr2g101920.1
c61527_g1_i1	2.90041	Medtr2g028580.2
c33095_g1_i1	2.893	Medtr6g080440.1
c66492_g1_i1	2.89117	Medtr7g107380.1
c77920_g1_i1	2.88785	Medtr3g070490.1
c63081_g1_i1	2.88519	Medtr5g031170.1
c76507_g1_i2	2.88502	Medtr4g013315.1
c73980_g1_i1	2.88318	Medtr1g069450.1
c69310_g1_i1	2.88115	AT4G34670.1
c69861_g1_i1	2.881	Medtr1g021740.1
c71355_g1_i1	2.88084	Medtr1g044795.1
c50414_g1_i1	2.87589	Medtr2g461790.1
c79643_g1_i2	2.87363	Medtr5g081810.1
c36862_g1_i1	2.8694	Medtr2g044440.1
c49912_g1_i1	2.86737	Medtr3g096410.1
c54342_g1_i1	2.86319	Medtr3g006350.1
c71098_g1_i2	2.8628	Medtr4g125770.3
c39526_g1_i1	2.86234	Medtr4g068580.1
c70688_g1_i3	2.86173	Medtr5g013610.1
c67834_g1_i1	2.86153	Medtr4g010250.1
c68422_g1_i1	2.8574	AT2G01250.1
c70973_g1_i1	2.85692	Medtr8g028160.1
c70407_g1_i2	2.8559	Medtr2g038000.1
c75282_g1_i1	2.85124	Medtr3g072320.1
c59577_g1_i1	2.85122	Medtr4g100700.2
c44261_g1_i1	2.85119	Medtr4g109140.1
c72085_g1_i3	2.84968	Medtr4g089095.1
c62258_g1_i2	2.84868	Medtr4g104380.1
c52112_g1_i1	2.84837	Medtr5g045600.1
c70213_g1_i2	2.84557	Medtr4g128570.1
c69051_g1_i1	2.84554	Medtr6g471240.1
c46589_g1_i1	2.84115	Glyma.17G202700.3.p
c81698_g1_i1	2.84077	Medtr7g029555.1
c76893_g2_i2	2.83806	Medtr4g046707.1
c77876_g1_i2	2.83764	Medtr1g484920.1
c68275_g1_i1	2.83484	Medtr3g086670.1
c66806_g1_i1	2.83477	Medtr1g085390.1
c60026_g1_i1	2.82996	Medtr2g034250.1
c71156_g1_i1	2.82968	Medtr5g011120.1
c74422_g1_i1	2.82762	Medtr7g069580.2
c66139_g1_i1	2.82681	Medtr1g075480.6
c73892_g1_i2	2.82656	Medtr5g018900.1
c80097_g2_i2	2.82372	Medtr5g066380.1
c47136_g1_i1	2.82139	Medtr3g102490.1
c80392_g1_i1	2.82056	Medtr4g057200.1
c62990_g1_i1	2.82015	Medtr7g055900.1
c74344_g1_i1	2.81672	Medtr5g043645.1
c59737_g1_i1	2.81374	Medtr2g031530.1
c56207_g1_i1	2.81193	Medtr1g088880.1
c81277_g1_i6	2.80964	Medtr8g042770.1
c80757_g3_i2	2.80534	Medtr8g104490.1
c71089_g1_i1	2.8023	Medtr3g070810.1
c64201_g1_i1	2.79717	Medtr8g107430.1
c68648_g1_i1	2.79186	Medtr5g090020.1
c66918_g1_i3	2.7889	Medtr2g098960.1
c59005_g1_i1	2.78534	Medtr5g099310.1
c50757_g1_i1	2.78288	Medtr5g069340.1
c59115_g1_i1	2.78192	Medtr1g050505.1
c67584_g1_i1	2.77431	Medtr2g436900.1
c80944_g1_i1	2.77405	Medtr3g115340.1
c81153_g1_i1	2.77174	Medtr5g070010.1
c64635_g1_i1	2.77154	Medtr8g006765.1
c71903_g1_i1	2.77002	Medtr5g087390.1
c53402_g1_i1	2.76824	Medtr7g092050.1
c70903_g1_i1	2.76537	Medtr1g086490.1
c75801_g1_i2	2.7635	Medtr6g004800.1
c81360_g1_i1	2.76117	Glyma.19G028400.1.p
c70217_g1_i1	2.76045	Medtr7g038910.2
c71168_g2_i1	2.75717	Medtr6g087590.1
c79105_g1_i2	2.75517	Medtr2g076070.1
c77884_g1_i1	2.75513	Medtr8g072350.1
c75774_g1_i1	2.75416	Medtr5g091060.1
c67877_g1_i1	2.75414	Medtr8g092010.1
c81763_g2_i1	2.75343	Medtr6g034030.2
c76811_g1_i1	2.74939	Medtr7g088790.1
c63218_g1_i1	2.74722	Medtr0006s0110.1
c67409_g1_i1	2.74504	Medtr4g080777.2
c67483_g1_i1	2.74219	Medtr8g045520.1
c80983_g1_i1	2.74196	Medtr3g061090.1
c74409_g1_i2	2.74049	Medtr2g066700.1
c78434_g1_i1	2.73979	Medtr8g079400.1
c64286_g1_i1	2.7375	Medtr1g019960.2
c72623_g1_i1	2.73083	Medtr2g035080.1
c65121_g1_i2	2.73044	Medtr2g094470.2
c67432_g1_i2	2.72753	Medtr1g035360.1
c74597_g1_i1	2.72552	Medtr7g067750.1
c77407_g1_i1	2.72509	Medtr3g110320.1
c71476_g1_i2	2.72316	Medtr1g016440.1
c82105_g2_i3	2.71964	Medtr8g031480.1
c76174_g1_i2	2.71948	Medtr6g023190.1
c77104_g1_i2	2.71948	Medtr4g086835.1
c58999_g1_i1	2.71945	Medtr4g106690.1
c80508_g1_i1	2.71906	Medtr1g073180.1
c64294_g1_i1	2.71888	Medtr3g097240.3
c77207_g1_i1	2.71796	Medtr2g042430.1
c73483_g1_i1	2.71479	Medtr2g096380.4
c81894_g2_i1	2.71473	Medtr8g090165.1
c46172_g1_i1	2.70979	Medtr7g111380.1
c69328_g1_i1	2.7059	Medtr5g069480.2
c76899_g1_i1	2.70308	Medtr1g007170.1
c75184_g2_i1	2.70179	Medtr2g102267.1
c68559_g1_i1	2.70103	Medtr6g011610.1
c79550_g1_i3	2.69332	Medtr4g077920.1
c81440_g1_i1	2.69153	Medtr4g020535.1
c63969_g1_i1	2.69046	Glyma.15G194200.4.p
c80899_g1_i4	2.68563	Medtr4g131020.2
c62895_g1_i1	2.68541	Medtr3g095080.1
c66750_g1_i1	2.68389	Medtr3g099150.1
c80281_g1_i2	2.6825	Medtr8g008820.1
c62050_g1_i1	2.6821	Medtr1g089760.1
c81737_g1_i1	2.68155	Medtr1g032010.1
c72122_g2_i2	2.67957	Medtr1g050855.1
c61837_g1_i1	2.67785	Medtr3g053340.1
c72471_g1_i3	2.67541	Medtr2g083650.1
c81044_g1_i1	2.67224	Medtr1g009680.2
c56722_g1_i1	2.66618	Medtr3g095670.1
c82116_g2_i2	2.66402	Medtr3g011820.1
c73845_g2_i1	2.65743	Medtr3g088440.2
c80201_g1_i1	2.6543	Medtr0014s0440.2
c75599_g1_i1	2.65375	Medtr4g048330.1
c64893_g1_i1	2.65367	Medtr5g008300.1
c72612_g1_i1	2.65312	Medtr3g092390.1
c75867_g1_i2	2.65176	Medtr3g055930.1
c79132_g1_i1	2.65051	Medtr4g060480.1
c64602_g1_i1	2.64777	Glyma.06G003300.1.p
c75507_g1_i3	2.64777	Medtr5g062230.1
c73382_g1_i1	2.64747	Medtr4g107010.1
c68392_g1_i1	2.64201	Medtr4g107290.2
c74052_g2_i1	2.64142	Medtr2g091175.1
c53615_g1_i1	2.63817	Medtr3g056380.1
c68255_g1_i2	2.63186	Medtr4g126270.1
c54257_g1_i2	2.62821	Medtr1g080800.1
c80149_g1_i1	2.62275	Medtr1g103680.1
c74990_g1_i2	2.62191	Medtr1g045370.1
c77922_g1_i2	2.6173	Medtr3g072430.1
c68197_g1_i2	2.61447	Medtr5g027870.1
c63352_g1_i1	2.60879	Medtr5g010000.1
c73150_g1_i1	2.60576	Medtr1g077030.1
c70067_g1_i1	2.60531	Glyma.08G097800.1.p
c78525_g2_i1	2.60434	AT4G04720.1
c73381_g1_i1	2.60378	Medtr3g098580.1
c70068_g1_i1	2.60184	Medtr7g059405.1
c8198_g1_i1	2.60025	Medtr7g095740.1
c82082_g1_i1	2.58954	Medtr7g012820.1
c66326_g1_i1	2.5843	Medtr4g063720.2
c76713_g1_i1	2.58047	Medtr7g078680.1
c77788_g1_i3	2.579	Medtr5g096820.1
c70255_g1_i1	2.57363	Medtr8g463180.1
c68123_g1_i1	2.57207	Medtr6g087600.1
c75710_g1_i2	2.56516	Medtr2g064415.1
c78592_g3_i1	2.55657	Medtr6g039440.1
c76204_g1_i1	2.55581	Medtr5g077170.1
c45195_g1_i1	2.5545	Glyma.08G234000.1.p
c77179_g1_i1	2.54861	Medtr6g082920.1
c80763_g2_i1	2.54806	Medtr7g096680.1
c68656_g1_i1	2.54226	Medtr8g066350.1
c66281_g1_i1	2.53736	Medtr6g007170.1
c70558_g1_i1	2.53703	Glyma.07G089500.1.p
c67742_g1_i1	2.53448	Medtr2g013160.1
c42179_g1_i1	2.53171	Medtr1g116957.1
c79768_g1_i4	2.52888	Medtr1g026140.1
c74845_g1_i4	2.5277	Medtr4g013315.1
c63907_g1_i1	2.52141	Medtr2g020860.3
c79426_g1_i1	2.51822	Glyma.16G039600.1.p
c80790_g1_i2	2.5174	Glyma.11G180100.1.p
c80609_g1_i1	2.51576	Medtr4g037105.1
c68584_g1_i1	2.51518	Medtr2g095700.1
c77645_g1_i3	2.51085	Medtr1g031530.1
c72583_g2_i1	2.50806	Medtr6g083730.1
c75334_g1_i1	2.50699	ATMG01360.1
c78042_g1_i1	2.50315	Medtr6g083980.1
c79002_g1_i1	2.5008	Medtr3g047950.1
c63484_g1_i1	2.50017	Medtr6g464080.1
c81919_g1_i1	2.49931	Medtr1g069605.1
c68790_g1_i1	2.49236	Medtr6g013220.1
c71588_g1_i1	2.4911	Medtr1g016120.1
c74517_g1_i1	2.48158	Medtr2g070460.1
c77982_g1_i2	2.47929	Medtr4g021350.1
c79129_g2_i2	2.47785	Glyma.08G326700.6.p
c77513_g1_i2	2.47702	Medtr2g072190.2
c75508_g1_i1	2.47653	Medtr7g086780.1
c61812_g1_i1	2.46405	Medtr4g101880.1
c81347_g1_i1	2.4611	Medtr1g086980.7
c65660_g1_i1	2.45398	Medtr4g019225.1
c71579_g3_i1	2.44728	Medtr6g025730.1
c77596_g1_i3	2.44725	Medtr6g028100.2
c48802_g1_i1	2.44442	Medtr1g089760.1
c47399_g1_i1	2.44125	Medtr5g033030.1
c73048_g1_i2	2.43635	Medtr3g068200.1
c74651_g1_i1	2.43478	Medtr8g080980.1
c71952_g1_i1	2.43035	Medtr8g027985.1
c82102_g1_i1	2.42946	Medtr3g024330.1
c80027_g1_i1	2.42742	Medtr0004s0510.1
c68418_g1_i2	2.42659	Medtr8g091995.2
c69928_g1_i1	2.42199	Medtr7g102820.1
c78953_g1_i1	2.42167	Medtr4g115070.1
c79554_g1_i3	2.41799	Medtr6g033280.1
c77767_g1_i5	2.41568	Medtr2g100560.1
c73701_g1_i1	2.39988	Medtr4g124040.5
c77741_g1_i1	2.39927	Medtr7g068810.1
c80544_g3_i1	2.39762	Medtr4g109450.1
c67651_g1_i1	2.3949	Medtr8g044070.1
c75409_g2_i2	2.38925	Medtr7g113050.1
c75452_g1_i2	2.38529	Medtr3g103590.1
c50252_g1_i1	2.38444	Medtr1g102220.1
c53161_g1_i1	2.37695	Medtr6g464180.1
c75312_g1_i1	2.37128	Medtr3g093970.1
c78132_g1_i1	2.36951	Medtr1g016780.1
c76810_g1_i1	2.36864	Medtr0144s0030.1
c69565_g1_i1	2.36707	Medtr1g008050.1
c60284_g1_i1	2.36524	Medtr4g082310.1
c65416_g1_i2	2.36339	Medtr6g060172.1
c68932_g1_i1	2.36264	Medtr7g055900.1
c76945_g1_i2	2.36199	Medtr8g103065.1
c59940_g1_i1	2.35847	Medtr3g087980.1
c56712_g1_i1	2.35788	Medtr4g065063.1
c65548_g1_i2	2.35709	Glyma.09G079100.3.p
c73545_g1_i1	2.3567	Medtr2g016230.1
c58127_g1_i1	2.35621	Medtr7g112360.2
c80777_g1_i1	2.35552	Medtr4g092760.1
c77513_g1_i4	2.35505	Medtr5g010870.1
c60721_g1_i1	2.35472	Medtr5g037340.2
c54030_g1_i1	2.3501	Medtr8g099340.1
c72496_g1_i1	2.33968	Medtr4g093600.1
c74749_g1_i1	2.33114	Glyma.14G223600.1.p
c46116_g1_i1	2.33059	Medtr6g007663.1
c72520_g1_i2	2.32801	Glyma.03G219700.1.p
c76488_g2_i2	2.32497	Medtr4g051698.1
c72428_g1_i1	2.32494	Medtr2g006770.1
c79033_g2_i1	2.32349	Medtr4g126970.1
c77009_g1_i2	2.30353	Medtr7g026520.1
c70411_g1_i1	2.30052	Medtr4g132430.1
c70444_g1_i1	2.30016	Medtr6g079540.2
c81522_g1_i4	2.29871	Medtr1g112910.3
c79959_g1_i1	2.29708	Medtr3g086220.1
c71998_g1_i2	2.29285	Medtr4g133890.2
c74066_g1_i2	2.29084	Medtr5g031000.2
c52088_g1_i1	2.28934	Medtr3g087590.2
c55781_g1_i1	2.28917	Medtr4g126780.1
c69003_g1_i2	2.27957	Medtr5g060950.1
c78097_g1_i1	2.27019	Medtr4g078860.4
c76866_g1_i1	2.26975	Medtr2g438140.1
c79640_g1_i3	2.26387	Medtr4g121840.3
c74238_g2_i2	2.25386	Medtr3g016080.1
c58355_g1_i2	2.25248	Medtr4g005730.3
c64379_g1_i1	2.24829	Medtr6g027510.1
c75771_g3_i1	2.24171	Medtr8g095140.1
c39737_g1_i1	2.24093	Medtr8g010590.1
c71066_g2_i1	2.23601	Medtr7g015190.2
c62998_g1_i2	2.23424	Medtr1g021730.2
c81562_g1_i4	2.23395	Medtr5g094430.1
c80768_g2_i1	2.2323	Medtr3g034670.1
c69664_g1_i1	2.22852	Medtr4g076640.1
c72257_g1_i1	2.2244	Medtr0021s0370.1
c66939_g1_i1	2.22435	Medtr5g019490.1
c76286_g1_i4	2.21774	Medtr3g062340.1
c64100_g1_i1	2.21741	Medtr7g099160.1
c72081_g1_i2	2.21615	Medtr0268s0040.1
c81604_g2_i4	2.2159	Medtr6g007770.1
c78618_g1_i2	2.20672	Medtr4g079510.1
c71030_g1_i1	2.2011	Medtr5g038440.1
c80087_g2_i1	2.2	Medtr2g032100.1
c75540_g1_i6	2.19753	Medtr8g019450.2
c73721_g1_i4	2.19427	Medtr7g112615.1
c69020_g2_i1	2.1932	Medtr8g094290.1
c80075_g1_i1	2.19051	Medtr4g094520.1
c73755_g1_i1	2.18467	Medtr2g091170.1
c64298_g1_i1	2.1749	Medtr1g070195.1
c78994_g3_i2	2.17485	Medtr4g105220.1
c79218_g1_i1	2.16928	Medtr4g059790.1
c71857_g2_i1	2.16453	Medtr8g088110.1
c74871_g1_i4	2.16334	Medtr4g073840.1
c79348_g1_i1	2.16118	Medtr3g082750.2
c81343_g1_i1	2.15281	Medtr1g052135.1
c80448_g2_i1	2.1527	Medtr1g011720.1
c78213_g1_i1	2.15236	Medtr2g069480.1
c58013_g1_i1	2.15013	Medtr1g087710.1
c71227_g1_i1	2.14905	Medtr5g066840.1
c69418_g1_i1	2.14793	Medtr7g032660.1
c34028_g1_i1	2.14776	Medtr2g087660.1
c67062_g1_i1	2.14251	Medtr3g068200.1
c81152_g1_i1	2.1352	Medtr1g018200.1
c75261_g1_i2	2.13096	Medtr5g014990.1
c63630_g1_i1	2.12983	Medtr1g023995.1
c72799_g1_i1	2.12702	Medtr5g094340.2
c80201_g1_i2	2.12584	Medtr0014s0440.2
c57537_g1_i1	2.12468	Medtr4g122800.1
c68519_g1_i1	2.11746	Medtr4g064993.1
c66570_g1_i1	2.11544	Medtr2g088000.1
c64015_g1_i1	2.11167	Medtr1g076250.1
c58250_g1_i1	2.11099	Medtr2g082450.1
c79943_g1_i6	2.11034	Medtr3g105990.1
c77092_g1_i4	2.1103	Medtr5g079860.1
c75619_g1_i1	2.10766	Medtr8g071900.1
c58921_g1_i1	2.10763	Medtr4g117050.1
c57365_g1_i1	2.10441	Medtr7g114260.1
c71708_g1_i1	2.10117	Medtr7g029540.1
c66945_g1_i2	2.09505	Medtr7g029555.1
c75069_g1_i1	2.0938	Medtr7g073970.1
c80207_g1_i2	2.09341	AT3G12110.1
c63998_g1_i2	2.09217	Medtr8g091330.2
c80768_g1_i1	2.09139	Medtr3g034670.1
c73653_g1_i1	2.09067	Medtr4g117330.1
c74807_g1_i1	2.08693	Medtr8g010620.1
c74457_g2_i1	2.08465	Medtr8g099415.3
c78331_g1_i3	2.08436	Medtr7g074150.1
c77677_g2_i1	2.08416	Medtr3g436390.1
c80750_g1_i1	2.0831	Medtr1g047210.1
c79319_g1_i1	2.08246	Glyma.08G056200.1.p
c78493_g1_i2	2.08009	Medtr8g069925.1
c72014_g1_i1	2.07894	Medtr3g450790.1
c76080_g1_i1	2.0704	Medtr7g080450.1
c67473_g1_i1	2.07027	Medtr1g050760.2
c58070_g1_i1	2.06962	Medtr7g079180.2
c79391_g1_i2	2.06822	Medtr8g469020.1
c79330_g2_i1	2.06813	Medtr4g029180.1
c55970_g1_i1	2.06736	AT4G23160.1
c71137_g1_i1	2.06701	Medtr3g107090.1
c62034_g1_i1	2.06371	Medtr3g103040.2
c70569_g1_i1	2.05662	Medtr4g024860.1
c81934_g1_i2	2.04801	Medtr7g077780.1
c71648_g1_i2	2.04665	Medtr8g068110.1
c75374_g1_i1	2.04586	Medtr4g011610.1
c67536_g1_i1	2.04191	Medtr3g096410.1
c67969_g2_i1	2.04137	Medtr1g033420.1
c81319_g1_i2	2.04136	Medtr3g106480.1
c67134_g1_i1	2.03122	Medtr4g070860.1
c80969_g1_i2	2.03073	Medtr4g024000.2
c66578_g1_i1	2.02954	Medtr2g099820.1
c79385_g2_i1	2.0291	Medtr6g452990.1
c75178_g1_i1	2.02767	Medtr8g089500.1
c77114_g2_i1	2.02279	Medtr8g079790.1
c81312_g2_i1	2.01908	Glyma.16G062800.1.p
c71086_g1_i1	2.01586	Medtr5g010635.1
c74826_g1_i1	2.00521	Medtr6g452990.1
c64036_g1_i1	2.00383	Medtr7g105870.1
c80903_g1_i1	1.98854	Glyma.16G219500.1.p
c79032_g2_i2	1.98799	Medtr5g038460.2
c80875_g1_i1	1.98783	Medtr2g012570.1
c75543_g1_i2	1.98502	Glyma.13G070200.4.p
c67036_g1_i2	1.97959	Medtr6g015890.1
c80672_g1_i1	1.97534	Medtr3g084410.1
c80619_g1_i4	1.97406	Medtr2g060350.1
c73274_g1_i1	1.97237	Medtr1g061730.1
c68004_g1_i1	1.9672	Glyma.11G165800.1.p
c74897_g1_i2	1.96451	Medtr1g107550.1
c80207_g1_i3	1.95988	AT3G12110.1
c71416_g2_i1	1.95252	Medtr3g096050.1
c62838_g1_i1	1.95094	Medtr3g080680.1
c75962_g1_i3	1.94455	Medtr1g031820.1
c66643_g1_i1	1.94151	Glyma.18G217400.1.p
c80966_g1_i3	1.94097	Medtr7g079350.1
c63667_g1_i2	1.93955	Glyma.18G151800.1.p
c70939_g1_i1	1.92275	Medtr5g025160.1
c72339_g1_i1	1.91482	Medtr5g030290.1
c73361_g1_i1	1.91335	Medtr1g081900.2
c76406_g1_i1	1.90816	Medtr4g082510.3
c79410_g3_i1	1.90438	Medtr2g084620.2
c74678_g1_i2	1.89938	Medtr8g090220.1
c68215_g1_i1	1.88831	AT1G58684.1
c81270_g1_i1	1.88569	Medtr3g462340.1
c76127_g1_i4	1.87995	Medtr2g100220.1
c66501_g1_i1	1.87398	Medtr3g061630.1
c78045_g1_i1	1.86743	Medtr7g114980.1
c81340_g2_i1	1.86652	Medtr7g094660.1
c75904_g1_i1	1.86304	Medtr1g025140.1
c60828_g1_i1	1.85818	Medtr8g098410.1
c58341_g1_i1	1.85727	Medtr7g108735.1
c74937_g1_i1	1.85663	Medtr1g054675.1
c70038_g2_i1	1.85246	Medtr1g084050.1
c76511_g1_i1	1.83791	Medtr8g069450.1
c74254_g2_i2	1.83785	Medtr4g007770.1
c81152_g2_i1	1.8369	Medtr1g018200.1
c73704_g1_i1	1.83247	Medtr4g007910.1
c70655_g1_i1	1.82743	Medtr7g079350.1
c74536_g1_i3	1.82444	Medtr2g095220.1
c75671_g1_i1	1.82219	Medtr1g484940.2
c75167_g1_i1	1.81189	Glyma.11G140500.1.p
c78371_g2_i1	1.81118	Medtr7g101870.1
c75445_g1_i1	1.78927	Medtr1g014690.1
c75722_g1_i1	1.77961	Medtr1g078240.1
c79237_g1_i2	1.77027	Medtr3g452360.2
c68133_g1_i2	1.75761	Glyma.18G245800.2.p
c81385_g1_i1	1.75591	Medtr2g010160.1
c66132_g1_i1	1.74113	Medtr1g041240.2
c54494_g1_i1	1.7404	Glyma.13G278000.1.p
c80182_g1_i2	1.73369	Medtr1g110300.4
c77743_g1_i2	1.73307	Medtr1g115285.1
c67807_g1_i1	1.72395	Medtr1g083620.1
c73890_g1_i1	1.72386	Medtr3g005170.1
c81847_g2_i2	1.72311	Medtr4g133968.1
c69305_g1_i1	1.72134	Medtr5g006340.3
c81137_g1_i1	1.7185	Medtr3g082660.1
c74563_g1_i1	1.69173	Medtr8g085900.1
c75957_g1_i1	1.68759	Medtr3g083500.2
c75883_g1_i1	1.68413	Glyma.07G049700.1.p
c78077_g2_i1	1.66146	Medtr3g084110.1
c70490_g1_i3	1.63495	Glyma.17G196000.1.p
c76238_g1_i2	1.63197	Glyma.09G148900.2.p
c72779_g1_i1	1.62209	Medtr3g449200.1
c80958_g1_i1	1.60301	Medtr3g080500.1
c75136_g1_i2	1.60201	Medtr1g096990.1
c80619_g1_i1	1.58179	Medtr3g030540.1
c73200_g1_i1	1.57566	Medtr2g017730.1
c77690_g2_i4	1.55789	Medtr3g105190.2
c77716_g1_i2	1.54171	Medtr3g078370.1
c79350_g1_i2	1.48006	Glyma.08G327200.1.p
c76627_g1_i1	1.42342	Medtr3g105390.1
c73976_g1_i1	1.38816	Glyma.15G134900.1.p
c75666_g1_i1	1.32783	Medtr2g010470.1
c45542_g2_i1	1.29477	Medtr2g105760.1
c81697_g1_i2	1.26043	Medtr2g435560.1
c81004_g1_i2	1.19893	Medtr4g109500.1
c82090_g1_i2	1.07097	Medtr2g046550.1
c74563_g1_i2	1.00795	Medtr8g085900.1
c58336_g1_i1	-1.50738	Medtr5g010025.1
c70540_g1_i1	-1.65418	ATCG00270.1
c79271_g1_i1	-1.69333	Glyma.11G133800.1.p
c64390_g1_i2	-1.75463	Medtr1g081410.1
c67105_g1_i1	-1.77418	Medtr4g115360.2
c78473_g1_i1	-1.78046	Medtr4g076600.1
c73420_g1_i1	-1.78859	Medtr4g099340.1
c46282_g1_i1	-1.84666	Medtr7g118060.2
c73269_g1_i1	-1.84793	Medtr3g058630.1
c70502_g1_i1	-1.86847	Medtr7g101190.1
c70745_g1_i1	-1.87261	Medtr3g103960.1
c75548_g1_i1	-1.88097	Medtr7g011060.1
c71253_g1_i1	-1.91036	Medtr4g107630.1
c81995_g1_i2	-1.91898	Glyma.06G223500.2.p
c69377_g1_i1	-1.98609	Medtr5g035010.1
c76060_g1_i2	-1.99582	Medtr1g030890.1
c59101_g1_i1	-2.01023	Medtr4g078885.1
c81525_g1_i1	-2.07894	Medtr5g096530.1
c70109_g1_i1	-2.07937	Medtr2g012450.1
c71444_g1_i1	-2.08631	Medtr8g100120.1
c69126_g3_i1	-2.12889	Glyma.03G252600.1.p
c82078_g1_i1	-2.15255	Medtr5g059820.1
c73626_g2_i2	-2.16565	Medtr3g098510.1
c73165_g1_i1	-2.19017	Medtr3g100500.1
c82113_g1_i1	-2.20349	Medtr2g102660.1
c60315_g1_i1	-2.20536	Medtr8g088720.1
c75758_g1_i1	-2.2073	Medtr1g015530.1
c81367_g1_i1	-2.23842	Medtr5g064610.1
c62220_g1_i1	-2.29	Medtr7g062470.1
c71340_g1_i2	-2.2915	Medtr4g059830.1
c73828_g1_i2	-2.30631	Medtr3g110720.1
c72866_g1_i1	-2.31543	Medtr7g068270.1
c63182_g1_i1	-2.37857	Medtr1g012710.1
c66633_g1_i1	-2.4533	Medtr3g101670.1
c78078_g3_i1	-2.45349	Medtr1g093600.1
c69862_g1_i1	-2.4779	Medtr7g007120.1
c77647_g1_i1	-2.54836	Medtr3g035600.1
c77780_g3_i1	-2.5589	Medtr1g011800.1
c68699_g1_i1	-2.58427	Medtr8g020590.1
c72883_g2_i1	-2.6757	Medtr3g083370.1
c64020_g1_i1	-2.68964	Medtr3g089570.1
c76951_g2_i1	-2.71186	Medtr8g096660.1
c64815_g1_i1	-2.79939	Medtr2g041550.1
c71178_g2_i1	-2.82683	Medtr7g093820.1
c72883_g3_i2	-2.86659	Medtr3g083370.1
c75548_g3_i2	-2.8908	Medtr3g466760.1
c13581_g1_i1	-2.99965	Medtr7g007120.3
c69126_g2_i1	-3.09955	Medtr7g116500.1
c55063_g1_i2	-3.14811	Medtr4g117470.1
c73857_g2_i1	-3.21547	Medtr6g011880.1
c60675_g2_i2	-3.21649	Medtr7g084770.1
c41552_g1_i1	-3.21662	Medtr0001s0660.1
c60650_g1_i1	-3.22077	Medtr5g096200.1
c43536_g1_i1	-3.50166	Medtr7g021690.1
c72429_g1_i1	-3.53012	Medtr5g430360.1
c42553_g1_i1	-3.54023	Medtr4g066000.1
c74944_g2_i1	-3.56726	Glyma.16G162600.1.p
c64823_g1_i1	-3.71575	Glyma.15G237700.1.p
c66739_g1_i2	-3.76329	Medtr8g022770.2
c77498_g1_i5	-3.78554	Medtr6g036510.1
c68753_g1_i1	-3.82193	Medtr5g026290.1
c70071_g1_i1	-3.91813	Medtr2g100340.1
c73688_g1_i1	-3.97091	Medtr2g096870.1
c80863_g1_i2	-3.97999	Medtr1325s0010.1
c69125_g1_i1	-4.01481	Medtr3g115200.1
c77780_g1_i3	-4.02749	Medtr1g011800.1
c74944_g2_i2	-4.05687	Glyma.16G162600.1.p
c31618_g1_i1	-4.06796	Medtr2g022190.1
c67392_g1_i2	-4.13098	Medtr8g024180.1
c77494_g2_i1	-4.18	Glyma.06G105600.6.p
c74508_g3_i4	-4.18191	Medtr5g090300.1
c78361_g1_i1	-4.18856	Medtr7g023730.1
c72604_g1_i2	-4.27246	Medtr4g125710.1
c80821_g1_i2	-4.27741	Medtr3g100890.1
c50248_g1_i1	-4.39905	Medtr1g068955.1
c76153_g2_i2	-4.46618	Medtr8g062720.1
c61691_g1_i2	-4.50402	Medtr3g032500.2
c71209_g1_i1	-4.54897	Medtr4g069090.1
c59484_g1_i1	-4.60107	Medtr1g086520.1
c72607_g1_i3	-4.64889	Medtr5g015830.1
c80112_g2_i1	-4.69895	Medtr7g086510.1
c19072_g1_i1	-4.74126	Medtr2g098250.1
c55267_g1_i1	-4.77538	Medtr3g104560.2
c80776_g1_i1	-4.80675	Medtr2g037880.2
c76414_g2_i1	-4.81681	Medtr2g021248.1
c81537_g1_i3	-4.8205	Medtr2g095980.2
c47558_g1_i1	-4.85292	Medtr3g013500.1
c69474_g1_i8	-4.90531	Medtr4g020535.1
c74746_g1_i3	-4.92077	Medtr2g034580.1
c58850_g1_i2	-4.95011	Medtr4g133750.1
c61692_g1_i1	-4.97105	Medtr8g023445.1
c80906_g1_i3	-5.00911	Medtr7g027185.3
c56883_g1_i1	-5.0199	Medtr2g040920.1
c64287_g1_i1	-5.03874	Medtr5g092220.1
c46713_g1_i1	-5.05099	Medtr1g048080.1
c49779_g1_i1	-5.09245	Medtr6g460490.1
c57814_g1_i1	-5.09402	Glyma.11G109300.2.p
c60651_g1_i1	-5.10458	Medtr0200s0020.1
c80531_g1_i4	-5.13332	Medtr2g074980.1
c73098_g2_i1	-5.1352	Medtr5g041255.1
c54466_g1_i1	-5.16506	Medtr5g036520.1
c29796_g1_i1	-5.22524	Medtr3g107970.1
c25316_g1_i1	-5.24493	Medtr5g090950.1
c52620_g1_i1	-5.28966	Medtr3g449470.1
c54444_g1_i1	-5.30679	Medtr3g047140.1
c75495_g1_i1	-5.31121	Medtr1g057810.1
c60406_g1_i2	-5.32093	Medtr3g081440.1
c14222_g1_i1	-5.33889	Medtr5g083480.1
c71839_g1_i3	-5.34436	Medtr4g131350.1
c75886_g1_i4	-5.35054	Medtr4g125950.1
c71167_g3_i1	-5.37456	Medtr2g049160.1
c64519_g1_i1	-5.38493	Medtr5g430360.1
c50991_g1_i1	-5.39281	Medtr6g021530.1
c57580_g1_i2	-5.41158	Medtr3g008960.1
c78721_g1_i1	-5.42111	Glyma.04G031800.6.p
c77924_g1_i1	-5.43465	Medtr8g479430.2
c42060_g1_i1	-5.45821	Medtr5g078780.1
c73835_g2_i2	-5.4941	Medtr1g115410.1
c73061_g3_i1	-5.52425	Medtr4g016800.1
c59771_g1_i2	-5.54664	Medtr3g047140.1
c59050_g1_i1	-5.59618	Medtr5g087320.1
c61477_g1_i1	-5.60967	Medtr4g045717.1
c11728_g1_i1	-5.62283	Medtr2g095260.1
c24831_g1_i1	-5.63144	Medtr3g086200.1
c43810_g1_i1	-5.6336	Glyma.16G130800.1.p
c29732_g1_i1	-5.63865	Medtr1g058110.1
c43172_g1_i1	-5.68276	Glyma.19G139400.1.p
c35605_g1_i1	-5.6976	Medtr6g086025.1
c78149_g1_i2	-5.70854	Medtr8g092510.1
c24052_g1_i1	-5.70959	Medtr2g086200.1
c69432_g1_i3	-5.75518	Medtr6g471100.1
c81028_g1_i7	-5.77881	Medtr2g103990.4
c64004_g3_i1	-5.79107	Medtr8g018260.1
c81189_g1_i2	-5.81021	Medtr2g021330.3
c42363_g1_i1	-5.82729	Medtr2g028340.1
c54469_g1_i1	-5.83204	Medtr1g086650.1
c42615_g1_i1	-5.8758	Medtr5g092250.1
c59732_g1_i1	-5.8814	Medtr4g116200.1
c68080_g2_i1	-5.89075	Medtr7g032380.1
c75046_g1_i2	-5.89224	Medtr3g116590.2
c47013_g1_i1	-5.89768	Medtr8g085560.1
c67458_g2_i2	-5.92188	Medtr4g053240.1
c56507_g1_i1	-5.92825	Medtr1g094610.1
c60772_g1_i1	-5.93895	Medtr7g062250.1
c35296_g1_i1	-5.94803	Medtr4g020630.1
c62668_g1_i1	-5.96459	AT2G17930.1
c33269_g1_i1	-5.9685	Medtr1g027520.1
c76351_g1_i1	-5.97207	Medtr7g017530.1
c5056_g1_i1	-5.97887	Medtr5g022770.1
c76671_g1_i1	-6.0196	Medtr7g105350.2
c65353_g2_i1	-6.06629	Medtr8g080910.1
c62543_g2_i1	-6.08855	Medtr6g017300.1
c87643_g1_i1	-6.09067	Medtr5g046670.1
c62134_g1_i1	-6.09738	Medtr3g073180.1
c45918_g1_i1	-6.10392	Medtr7g091470.1
c48808_g1_i1	-6.1068	Medtr3g019010.1
c59797_g1_i1	-6.13279	Medtr3g109030.1
c73584_g2_i5	-6.14752	Medtr8g059295.1
c71816_g2_i2	-6.14877	Medtr1g060030.1
c57728_g1_i1	-6.16509	Medtr4g099050.1
c52119_g1_i1	-6.1779	Glyma.17G174900.1.p
c43729_g1_i1	-6.18288	Medtr2g008210.1
c65398_g1_i1	-6.18534	Medtr1g475240.1
c68945_g2_i1	-6.18617	Medtr8g013910.1
c67467_g5_i1	-6.1878	Medtr4g020640.2
c56866_g1_i1	-6.18903	Medtr1g085040.1
c60005_g1_i1	-6.19499	Medtr2g426020.1
c58891_g1_i2	-6.21205	Medtr8g106695.1
c78970_g1_i3	-6.24227	Medtr7g012370.1
c37853_g1_i1	-6.25413	Medtr8g094810.1
c54491_g1_i1	-6.25496	Glyma.02G181400.1.p
c60054_g1_i1	-6.29713	Medtr8g039910.4
c11085_g1_i1	-6.30583	Medtr2g011230.1
c57623_g2_i1	-6.30721	Medtr8g042470.1
c56051_g1_i1	-6.30914	Medtr3g071460.1
c81570_g1_i2	-6.34231	Medtr6g088250.3
c71741_g1_i1	-6.36324	Medtr1g101240.2
c76410_g1_i3	-6.39671	Medtr5g054780.1
c81221_g2_i7	-6.41081	Medtr4g022480.1
c50940_g1_i1	-6.41312	Medtr7g022220.1
c86104_g1_i1	-6.41347	Medtr4g005350.1
c55182_g1_i1	-6.42096	Medtr7g056280.1
c64084_g1_i1	-6.437	Medtr1g012180.1
c50878_g1_i1	-6.44182	AT5G54500.1
c88777_g1_i1	-6.44476	Medtr3g084790.1
c80419_g1_i1	-6.46061	Medtr4g116160.2
c70211_g1_i1	-6.47891	Medtr5g017790.1
c48994_g1_i1	-6.48367	Medtr8g093560.1
c10586_g1_i1	-6.49041	Medtr2g070210.1
c57058_g1_i1	-6.52188	Medtr0602s0020.1
c52829_g1_i1	-6.52647	Medtr4g011630.1
c54195_g1_i3	-6.5544	Medtr7g113380.3
c48119_g1_i1	-6.55854	Glyma.08G098500.1.p
c33433_g1_i1	-6.56725	Glyma.19G023400.1.p
c49518_g1_i1	-6.56725	Medtr1g094210.1
c82041_g1_i6	-6.58564	Medtr0419s0040.1
c51459_g1_i1	-6.58607	Medtr1g007020.1
c67739_g1_i4	-6.58785	Medtr7g087455.1
c52387_g1_i1	-6.59112	Medtr3g111990.1
c46769_g1_i1	-6.64908	Medtr5g005940.1
c6968_g1_i1	-6.65358	Medtr3g104590.1
c67636_g1_i2	-6.66209	Medtr8g028500.1
c48578_g1_i1	-6.66832	Glyma.15G237000.1.p
c28379_g1_i1	-6.68763	Medtr6g044600.1
c80972_g1_i1	-6.6906	Glyma.04G246800.1.p
c83271_g1_i1	-6.69119	Medtr8g022750.1
c59611_g1_i1	-6.69576	Medtr2g072610.1
c43399_g1_i1	-6.71265	Medtr8g098425.1
c79636_g1_i4	-6.7135	Medtr8g023445.1
c72543_g1_i1	-6.73581	Medtr3g049490.1
c56077_g1_i1	-6.74736	Medtr1g115280.1
c67979_g1_i1	-6.75482	Medtr3g067940.1
c52639_g1_i1	-6.76002	Medtr5g042100.1
c33585_g1_i1	-6.76771	Medtr2g067980.1
c60587_g1_i1	-6.7817	Medtr2g091140.1
c72739_g1_i2	-6.78363	Medtr6g040290.1
c81455_g1_i1	-6.80788	Medtr2g006960.1
c51360_g1_i1	-6.82887	Medtr1g086540.1
c22721_g1_i1	-6.84114	Medtr8g087530.1
c77134_g1_i5	-6.84699	Medtr1g075200.1
c76259_g1_i1	-6.89278	Medtr5g099070.1
c74422_g1_i3	-6.8957	Medtr7g069580.2
c25680_g1_i1	-6.90631	Medtr3g117060.1
c73117_g1_i1	-6.92126	Medtr0019s0170.1
c89025_g1_i1	-6.92418	Medtr8g008990.1
c71101_g3_i1	-6.92719	Medtr8g027605.1
c47506_g1_i1	-6.92765	Medtr5g008900.1
c72793_g1_i2	-6.93351	Medtr5g044895.1
c65020_g1_i1	-6.94514	Medtr4g091800.1
c37143_g1_i1	-6.96755	Medtr7g010000.1
c48219_g1_i1	-7.01068	Medtr1g104630.1
c20918_g1_i1	-7.03049	Medtr7g091550.1
c61329_g1_i1	-7.04334	Medtr8g045070.1
c78309_g2_i1	-7.0453	Medtr3g023880.2
c68785_g1_i1	-7.05953	Medtr5g086945.1
c77816_g3_i1	-7.05983	Medtr2g100070.1
c33842_g1_i1	-7.07624	Medtr1g027540.1
c52202_g1_i1	-7.08975	Medtr8g011600.1
c67559_g1_i1	-7.10467	Medtr7g084220.1
c52536_g1_i1	-7.1128	Medtr3g023030.1
c62607_g1_i1	-7.11426	Medtr6g059760.1
c62231_g2_i1	-7.13379	Medtr4g108240.3
c60066_g1_i1	-7.1391	Medtr5g011110.1
c14044_g1_i1	-7.15059	Medtr5g015540.1
c59684_g1_i1	-7.16513	Glyma.01G184700.1.p
c64634_g1_i1	-7.1698	Medtr3g462290.1
c57157_g1_i1	-7.24325	Medtr7g117355.1
c67793_g2_i1	-7.27535	Medtr7g078180.1
c56577_g1_i3	-7.29854	Medtr3g498785.2
c61743_g1_i1	-7.31262	Medtr5g057040.1
c55124_g1_i1	-7.31296	Medtr0445s0040.1
c51582_g1_i1	-7.32477	Medtr4g122070.1
c56654_g2_i1	-7.36012	Medtr1g046130.1
c66221_g1_i2	-7.3615	Medtr4g076180.1
c28376_g1_i1	-7.36278	Medtr1g048630.1
c48424_g1_i1	-7.3692	Medtr8g006260.1
c24900_g1_i1	-7.36964	Medtr0200s0020.1
c56109_g1_i1	-7.36964	Medtr4g011660.1
c56685_g1_i1	-7.42504	Medtr1g073700.1
c72224_g1_i1	-7.45892	Glyma.08G003200.2.p
c29413_g1_i1	-7.53119	Medtr4g415390.1
c71927_g2_i1	-7.54199	Medtr7g013850.1
c73465_g2_i3	-7.54582	Medtr0232s0030.1
c50426_g1_i1	-7.55124	Medtr7g050445.1
c3302_g1_i1	-7.57602	Glyma.11G062900.1.p
c55977_g1_i1	-7.57605	Medtr4g020640.2
c61387_g1_i1	-7.67957	Medtr8g086320.1
c25965_g1_i1	-7.68847	Medtr7g094190.1
c43464_g1_i1	-7.70399	Medtr1g106200.1
c49230_g1_i1	-7.71761	Medtr2g090980.1
c81257_g1_i1	-7.73405	Medtr2g033080.1
c60051_g1_i1	-7.738	Medtr4g059830.1
c57007_g1_i1	-7.75976	Medtr6g073540.1
c80029_g3_i1	-7.77082	Medtr0043s0080.2
c34620_g1_i1	-7.77101	Medtr8g085790.1
c35457_g1_i1	-7.77348	Medtr8g099800.1
c75630_g1_i1	-7.77386	Medtr1g057850.1
c63597_g1_i1	-7.78728	Medtr3g030080.1
c76960_g1_i1	-7.82552	Medtr6g053090.1
c63885_g1_i1	-7.83107	Medtr2g097700.1
c42701_g1_i1	-7.83632	AT4G23160.1
c5345_g1_i1	-7.84545	AT4G23160.1
c1888_g1_i1	-7.8598	Medtr1g090320.2
c25916_g1_i1	-7.86635	Medtr8g083310.1
c70156_g1_i1	-7.905	Medtr8g061960.1
c71840_g1_i3	-7.90573	Medtr1g109320.1
c74154_g1_i1	-7.91421	Medtr1g009650.1
c62831_g1_i2	-7.91672	Medtr8g069880.1
c53422_g1_i2	-7.93215	Medtr7g114100.1
c42816_g1_i1	-7.94588	Glyma.10G098100.1.p
c80372_g1_i2	-7.99797	Medtr4g116770.1
c48051_g1_i2	-8.00475	Medtr5g031470.1
c48756_g1_i1	-8.00637	Medtr2g038760.1
c85147_g1_i1	-8.03003	Medtr2g031720.1
c78262_g1_i2	-8.04685	Medtr3g117990.1
c52820_g1_i1	-8.04958	Medtr2g068910.1
c55839_g1_i1	-8.07182	Medtr8g092060.2
c70193_g1_i2	-8.08637	Medtr1g013400.1
c70935_g1_i1	-8.10324	Medtr2g040350.2
c42835_g1_i1	-8.10863	Medtr4g106410.1
c48324_g1_i1	-8.13898	Medtr2g060420.4
c51110_g1_i1	-8.14049	Medtr4g132280.1
c16702_g1_i1	-8.14348	Glyma.15G043400.3.p
c72016_g2_i3	-8.14877	Medtr3g032800.1
c65109_g1_i3	-8.15987	Medtr5g076840.1
c41132_g1_i1	-8.16117	Medtr0122s0020.2
c73873_g4_i1	-8.19441	Medtr3g062340.1
c77217_g1_i3	-8.19441	Medtr1g029940.1
c5419_g1_i1	-8.20629	Medtr0014s0180.1
c51785_g1_i1	-8.21962	Medtr0116s0010.1
c72694_g1_i4	-8.22921	Medtr3g010520.1
c49730_g1_i1	-8.23645	Medtr6g093150.2
c44396_g1_i1	-8.24296	Medtr2g080230.1
c52156_g3_i1	-8.2715	Medtr4g081230.1
c85566_g1_i1	-8.27381	Medtr5g011000.1
c79990_g1_i2	-8.28518	Medtr3g100160.1
c72275_g1_i2	-8.2915	Medtr0123s0070.1
c70691_g1_i1	-8.29342	Medtr0148s0080.1
c59171_g1_i1	-8.29487	Medtr5g039880.1
c64089_g1_i1	-8.31111	Medtr8g088780.1
c25071_g1_i1	-8.31432	Medtr2g438050.1
c5724_g1_i1	-8.31432	Medtr3g117625.1
c72094_g1_i1	-8.3351	Medtr2g021155.1
c49456_g1_i1	-8.34061	Medtr1g069190.1
c43867_g1_i1	-8.34551	Medtr2g084270.1
c63608_g1_i2	-8.34622	Medtr2g102500.1
c58959_g1_i2	-8.35362	Medtr3g105605.1
c37925_g1_i2	-8.36036	Medtr4g070810.1
c56280_g1_i1	-8.37815	Medtr6g080650.1
c75236_g3_i4	-8.37932	Medtr3g435980.1
c82702_g1_i1	-8.38027	Medtr4g092980.1
c63147_g1_i2	-8.39419	Medtr5g092510.1
c49201_g1_i1	-8.40527	Medtr4g122000.1
c60728_g1_i1	-8.40697	Medtr6g023950.1
c33264_g1_i1	-8.40793	Glyma.13G036500.1.p
c53334_g1_i1	-8.41661	Medtr3g027870.2
c43651_g1_i1	-8.41969	Medtr7g117110.1
c25657_g1_i1	-8.41989	Medtr4g134400.2
c8003_g1_i1	-8.43446	Medtr7g063470.2
c56648_g1_i1	-8.44374	Medtr7g110260.1
c7541_g1_i1	-8.44374	Medtr3g084790.1
c17954_g1_i1	-8.4682	Medtr5g037050.1
c59143_g1_i1	-8.47079	Medtr4g050060.1
c41765_g1_i1	-8.47588	Medtr3g113140.1
c75465_g2_i1	-8.47588	Medtr0137s0080.1
c38660_g1_i1	-8.47981	Medtr3g012470.1
c33333_g1_i1	-8.49427	Medtr4g068360.1
c30856_g1_i1	-8.49776	Medtr5g066320.1
c53419_g1_i1	-8.50336	Medtr5g026370.1
c46665_g1_i1	-8.506	Glyma.09G207500.1.p
c34876_g1_i1	-8.50647	Medtr3g082070.1
c70279_g1_i1	-8.50821	Medtr8g089030.2
c81721_g1_i2	-8.52403	Medtr7g109530.3
c39267_g1_i1	-8.53136	Medtr4g087250.1
c71248_g1_i2	-8.53436	Medtr1g115575.1
c62019_g4_i1	-8.53943	Medtr1g107315.1
c5390_g1_i1	-8.54254	Medtr4g108730.1
c62590_g1_i1	-8.55159	Medtr2g007550.1
c77885_g1_i2	-8.56083	Medtr1g012800.1
c58824_g1_i1	-8.56118	Medtr4g116500.1
c56796_g1_i1	-8.56588	Medtr3g077360.1
c59145_g1_i1	-8.5728	Medtr4g132540.2
c80888_g1_i1	-8.58133	Medtr5g026210.1
c54145_g1_i1	-8.58542	Medtr3g034000.1
c58519_g1_i1	-8.5986	Medtr6g027580.1
c67739_g1_i5	-8.60236	Medtr4g129250.1
c79428_g1_i3	-8.60236	Medtr2g091185.1
c80947_g1_i1	-8.60321	Medtr8g464860.1
c40007_g1_i1	-8.60559	Medtr3g451150.1
c66295_g1_i2	-8.60559	Medtr4g058710.5
c6774_g1_i1	-8.60825	Medtr2g013550.2
c46393_g1_i1	-8.60838	Medtr5g092150.1
c20870_g1_i1	-8.60905	Medtr4g069090.1
c81801_g1_i1	-8.60921	Medtr7g105980.2
c79711_g1_i1	-8.61048	Medtr5g086790.1
c63226_g1_i1	-8.62096	Glyma.16G063000.1.p
c21051_g1_i1	-8.62351	Medtr5g071190.1
c65771_g1_i1	-8.62431	Medtr0590s0020.1
c30953_g1_i1	-8.6299	Medtr5g041630.1
c59961_g1_i1	-8.63177	Medtr1g052880.1
c74332_g1_i3	-8.63899	Medtr6g011060.1
c66201_g1_i3	-8.63905	Medtr3g030080.1
c78939_g1_i2	-8.64581	Medtr2g103140.1
c65913_g1_i4	-8.64731	Glyma.17G065500.1.p
c14041_g1_i1	-8.65819	AT1G72370.2
c72737_g1_i2	-8.65819	Medtr1g035860.1
c59050_g2_i1	-8.66085	Medtr5g087090.1
c59624_g1_i1	-8.66706	Medtr2g015870.1
c73454_g1_i2	-8.66706	Medtr6g069620.1
c32869_g1_i1	-8.67431	Medtr2g096160.1
c68674_g1_i1	-8.67431	Medtr1g056870.1
c85454_g1_i1	-8.6798	Medtr5g023180.5
c5970_g1_i1	-8.6866	Medtr3g072000.1
c33083_g1_i1	-8.69827	Medtr3g100420.2
c76794_g2_i1	-8.70475	Medtr8g047190.1
c46774_g1_i2	-8.70535	Medtr2g449840.1
c16729_g1_i1	-8.7065	Medtr1g111240.1
c1280_g1_i1	-8.7092	Medtr3g023490.1
c35458_g1_i1	-8.71259	Medtr4g094758.1
[truncated: 235 more rows]
